# Supplementary material for: Phosphine-catalysed reductive coupling of dihalophosphanes
Source: Royal Society of Chemistry journal article supplement (doi:10.1039/d1dt03095g), 2021-01-01
Supplement: d1dt03095g1.pdf [file d1dt03095g1.pdf]

## SUPPORTING INFORMATION

### Phosphine-catalyzed reductive coupling of Dihalophosphines

*Jan-Erik Siewert, André Schumann, Christian Hering-Junghans\**

Leibniz Institut für Katalyse e.V. (LIKAT), A.-Einstein-Str. 3a, 18059 Rostock, Germany.

E-mail: [Christian.hering-junghans@catalysis.de](mailto:Christian.hering-junghans@catalysis.de)

Web [<https://www.catalysis.de/forschung/aktivierung-kleiner-molekuele>]

#### **This file includes:**

|   |                                      |    |
|---|--------------------------------------|----|
| 1 | Experimental .....                   | 2  |
| 2 | Syntheses of starting materials..... | 4  |
| 3 | Catalytic Trial Reactions.....       | 8  |
| 4 | Syntheses of compounds .....         | 42 |
| 5 | Structure elucidation .....          | 61 |
| 6 | Computational details .....          | 65 |
| 7 | References .....                     | 87 |

# 1 Experimental

**General Information.** If not stated otherwise, all manipulations were carried out under oxygen- and moisture-free conditions under an inert atmosphere of argon using standard Schlenk or Drybox techniques. All glassware was heated three times *in vacuo* using a heat gun and cooled under argon atmosphere. Solvents were transferred using syringes, which were purged three times with argon prior to use. Solvents and reactants were either obtained from commercial sources or synthesized as detailed in Table S1.

**Table S1:** Origin and purification of solvents and reactants.

| Substance                           | Origin                       | Purification                                                                                     |
|-------------------------------------|------------------------------|--------------------------------------------------------------------------------------------------|
| THF, <i>n</i> -hexane, toluene      | local trade                  | solvent purification system, stored under argon                                                  |
| PEt <sub>3</sub> , PMe <sub>3</sub> | Sigma Aldrich                | used as received                                                                                 |
| CD <sub>2</sub> Cl <sub>2</sub>     | euriso-top                   | dried over P <sub>4</sub> O <sub>10</sub> and CaH <sub>2</sub><br>freshly distilled prior to use |
| C <sub>6</sub> D <sub>6</sub>       | euriso-top                   | dried over Na<br>freshly distilled prior to use                                                  |
| Mes-Br                              | TCI Chemicals, 99%           | used as received                                                                                 |
| Tip-Br                              | Sigma Aldrich, 95%           | used as received                                                                                 |
| Dip-NH <sub>2</sub>                 | abcr, technical grade 90%    | used as received                                                                                 |
| PBr <sub>3</sub>                    | Sigma Aldrich, for synthesis | used as received                                                                                 |
| Mg                                  | abcr, 99.8%, for Grignards   | used as received                                                                                 |
| [BrPEt <sub>3</sub> ]Br             | Synthesized <sup>[1]</sup>   |                                                                                                  |
| Cl <sub>2</sub> PMe <sub>3</sub>    | Synthesized <sup>[2]</sup>   |                                                                                                  |

**NMR spectra** were recorded on Bruker spectrometers (AVANCE 300, AVANCE 400 or Fourier 300) and were referenced internally to the deuterated solvent (<sup>13</sup>C: C<sub>6</sub>D<sub>6</sub>  $\delta_{\text{ref}}$  = 128.06 ppm) or to protic impurities in the deuterated solvent<sup>[3]</sup> (<sup>1</sup>H: C<sub>6</sub>HD<sub>5</sub>  $\delta_{\text{ref}}$  = 7.16 ppm) or externally (<sup>31</sup>P: 85% H<sub>3</sub>PO<sub>4</sub>  $\delta_{\text{ref}}$  = 0 ppm). All measurements were carried out at ambient temperature unless denoted otherwise. NMR signals were assigned using experimental data (e.g. chemical shifts, coupling constants, integrals where applicable).

**IR spectra** of crystalline samples were recorded on a Bruker Alpha II FT-IR spectrometer equipped with an ATR unit at ambient temperature under argon atmosphere. Relative intensities are reported according to the following intervals: weak (w, 0–33%), medium (m, 33–66%), strong (s, 66–100%).

**Elemental analyses** were obtained using a Leco Tru Spec elemental analyzer.

**Mass spectra** were performed by the LIKAT analytic department. Electron Impact (EI<sup>+</sup>) spectra were performed at 70 eV using methane as the carrier gas, with time-of-flight (TOF) mass analyzer. Electrospray ionization (ESI<sup>+</sup>) spectra were performed using a time-of-flight (TOF) mass analyzer. Data are reported in the form of m/z. High-resolution mass was obtained by using Waters Q-TOF Ultima ESI and Agilent 6230 ESI TOF LC/MS spectrometers.

**UV-Vis spectra** were acquired on a Mettler Toledo UV5iso spectrometer.

**Cyclic Voltammetry (CV)** were recorded using a Methrom Autolab PGSTAT204 potentiostat at 23 °C in THF containing 0.1 M [N<sup>n</sup>Bu<sub>4</sub>][PF<sub>6</sub>] at scan rates of 100 mV·s<sup>-1</sup>. A standard three-electrode cell configuration was employed using a glassy carbon working electrode, a platinum wire counter electrode, and a silver wire serving as the reference electrode. Formal redox potentials are referenced to the [FeCp<sub>2</sub>]/[FeCp<sub>2</sub>]<sup>+</sup> redox couple.

## 2 Syntheses of starting materials

### 2.1 2,6-Diisopropylphenylbromine DipBr

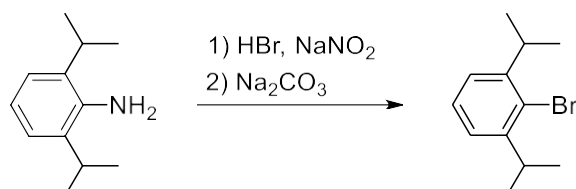

*DipBr* is prepared according to a slightly modified literature procedure.<sup>[4]</sup> 2,6-Diisopropylaniline (30.2 g, 0.170 mmol) is added dropwise to concentrated hydrobromic acid (48%, 150 mL) with vigorous stirring. The pink suspension was cooled to  $-78\text{ }^{\circ}\text{C}$ , and sodium nitrite (20.0 g, 289 mmol), dissolved in H<sub>2</sub>O (90 mL) was added dropwise. The brownish suspension was stirred overnight at room temperature and neutralized with Na<sub>2</sub>CO<sub>3</sub>. The aqueous phase was extracted with Et<sub>2</sub>O (3x 150 mL). The combined organic layers were washed with a saturated aqueous Na<sub>2</sub>S<sub>2</sub>O<sub>3</sub> solution. The organic layer was then dried with Na<sub>2</sub>SO<sub>4</sub> and after filtration the solvent was removed *in vacuo*. Fractional distillation of the remaining reddish oil at 0.01 mbar yielded the product as a light yellow liquid (boiling temperature:  $65\text{ }^{\circ}\text{C}$ ). Yield: 25.5 g (0.106 mol, 62%).

**<sup>1</sup>H NMR** (C<sub>6</sub>D<sub>6</sub>, 300 MHz):  $\delta$  = 7.10 – 6.90 (m, 3H, C<sub>Ar</sub>H), 3.59 (hept, <sup>3</sup>J<sub>HH</sub> = 6.9, 2H, CH(CH<sub>3</sub>)<sub>2</sub>), 1.14 (d, <sup>3</sup>J<sub>HH</sub> = 6.9 Hz, 12H, CH(CH<sub>3</sub>)<sub>2</sub>) ppm.

### 2.2 2,6-Diisopropylphenyldibromophosphine DipPCl<sub>2</sub>

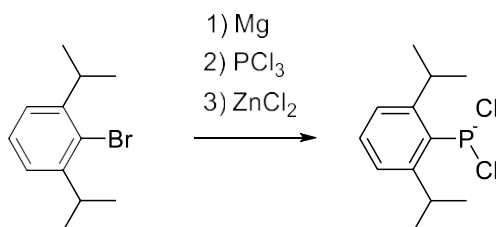

*DipPCl<sub>2</sub>* was prepared according to a slightly modified literature procedure.<sup>[5]</sup>

Magnesium turnings (1.46 g, 60 mmol) were suspended in THF (80 mL) and 2,6-diisopropyl-1-bromobenzene (9.85 g, 40.84 mmol) was added slowly at room

temperature and stirring was continued for 1 h. Afterwards the mixture was heated to reflux for an additional 2 h resulting in a brownish solution. To a solution of  $\text{PCl}_3$  (10.5 mL, 120 mmol) in toluene (50 mL) the Grignard reagent was added dropwise *via* a filter cannula at  $-78^\circ\text{C}$  and the mixture was allowed to warm to room temperature overnight. Afterwards the solvent was removed from the reaction mixture *in vacuo* and the yellowish, sticky residue ( $\text{DipPX}_2$ ) was extracted with *n*-hexane and subsequently the *n*-hexane was distilled off from the filtrate. The remaining yellow solid was dissolved in THF (80 mL). Anhydrous  $\text{ZnCl}_2$  (27.25 g, 200 mmol) was added to this solution and stirring at room temperature was continued overnight. Subsequently, the reaction was filtered over a celite-padded frit (G3), the filtrate was evaporated and extracted with fresh *n*-hexane (50 mL), resulting in a clear pale yellow solution. From this solution *n*-hexane was distilled off, affording  $\text{DipPCl}_2$  (3.82 g, 14.5 mmol, 36 %) as pale yellow oil.

**$^1\text{H}$  NMR** ( $\text{C}_6\text{D}_6$ , 300 MHz):  $\delta$  = 7.10 (m, 1H), 6.93-6.97 (m, 2H), 4.14 (sept,  $^3J_{\text{HH}}$  = 6.7 Hz, 2H,  $\text{CH}(\text{CH}_3)_2$ ), 1.14 (d,  $^3J_{\text{HH}}$  = 6.7 Hz, 12H,  $\text{CH}(\text{CH}_3)_2$ ).  **$^{31}\text{P}$  NMR** ( $\text{C}_6\text{D}_6$ , 121.51 MHz):  $\delta$  = 164.2 ppm.

### 2.3 2,6-Diisopropylphenyldibromophosphine $\text{DipPBr}_2$

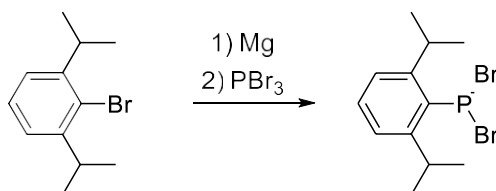

*DipPBr<sub>2</sub>* was prepared according to a slightly modified literature procedure.<sup>[5]</sup>

Magnesium turnings (1.46 g, 60 mmol) were suspended in THF (80 mL) and 2,6-diisopropyl-1-bromobenzene (9.85 g, 40.84 mmol) was added slowly at room temperature and stirring was continued for 1 h. Afterwards the mixture was heated to reflux for additional 4 h resulting in a brownish solution. To a solution of  $\text{PBr}_3$  (3.9 mL, 41 mmol) in THF (50 mL) the Grignard reagent was added dropwise *via* a filter cannula at  $-78^\circ\text{C}$  and the mixture was allowed to warm to room temperature overnight. Afterwards, the solvent was removed from the reaction mixture *in vacuo* and the yellowish, sticky residue was extracted with *n*-hexane and subsequently the solvent was distilled off from the filtrate.  $\text{DipPBr}_2$  (9.25 g, 26 mmol, 63 %) is obtained as a yellow oil.

**$^1\text{H}$  NMR** ( $\text{C}_6\text{D}_6$ , 300 MHz)  $\delta$  = 7.13 – 6.91 (m, 3H,  $\text{C}_{\text{Ar}}\text{H}$ ), 4.25 – 4.08 (m, 2H,  $\text{CH}(\text{CH}_3)_2$ ), 1.17 (d,  $^3J_{\text{HH}}$  = 6.7 Hz, 12H,  $\text{CH}(\text{CH}_3)_2$ ) ppm.  **$^{31}\text{P}$  NMR** ( $\text{C}_6\text{D}_6$ , 122 MHz)  $\delta$  = 151.01 ppm.

## 2.4 2,4,6-Triisopropylphenyldibromophosphine TipPBr<sub>2</sub>

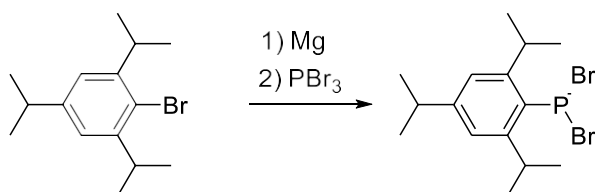

*TipPBr<sub>2</sub> was prepared according to the literature procedure.*<sup>[5]</sup>

Magnesium turnings (0.27 g, 11 mmol) were suspended in THF (50 mL) and 2,4,6-triisopropyl-1-bromobenzene (TipBr) (2.83 g, 10 mmol) was added slowly at room temperature and stirring was continued for 1 h. Afterwards, the mixture was heated to reflux for 1 h, resulting in a brownish solution. To a solution of PBr<sub>3</sub> (1.42 mL, 15 mmol) in THF (15 mL) the Grignard reagent was added dropwise *via* a filter cannula at –78 °C and the mixture was allowed to warm to room temperature overnight. Afterwards, the solvent was removed from the reaction mixture *in vacuo* and the yellowish residue was extracted with *n*-hexane, resulting in a clear yellow solution, which was concentrated to incipient crystallization and allowed to stand at 5 °C for a period of 24 h, resulting in the deposition of yellow needles of TipPBr<sub>2</sub> (2.01 g, 5.1 mmol, 51%).

**<sup>1</sup>H NMR** (C<sub>6</sub>D<sub>6</sub>, 300.13 MHz): δ = 7.03 (d, *J*<sub>PH</sub> = 3.6 Hz, 2H, C<sub>Ar</sub>H), 4.23 (m, 2H, *o*-CH(CH<sub>3</sub>)<sub>2</sub>), 2.61 (sept, <sup>3</sup>*J*<sub>HH</sub> = 6.9 Hz, 1H, *p*-CH(CH<sub>3</sub>)<sub>2</sub>), 1.24 (d, <sup>3</sup>*J*<sub>HH</sub> = 6.4 Hz, 12H, *o*-CH(CH<sub>3</sub>)<sub>2</sub>), 1.08 (d, <sup>3</sup>*J*<sub>HH</sub> = 6.9 Hz, 6H, *p*-CH(CH<sub>3</sub>)<sub>2</sub>) ppm. **<sup>31</sup>P NMR** (C<sub>6</sub>D<sub>6</sub>, 121.51 MHz): δ = 151.8 ppm.

## 2.5 2,4,6-Triisopropylphenyldichlorophosphine TipPCl<sub>2</sub>

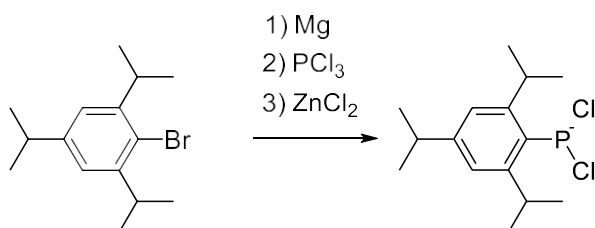

*TipPCl<sub>2</sub> was prepared according to a modified the literature procedure.*<sup>[5]</sup>

Magnesium turnings (0.81 g, 33 mmol) were suspended in THF (80 mL) and 2,6-triisopropyl-1-bromobenzene (TipBr) (8.49 g, 30 mmol) was added slowly at room temperature and stirring was continued for 1 h. Afterwards the mixture was heated to reflux for additional 4 h resulting in a brownish solution. To a solution of PCl<sub>3</sub> (5.25 mL, 60 mmol) in THF (100 mL) the Grignard reagent was added dropwise *via* a filter cannula

at  $-78^{\circ}\text{C}$  and the mixture was allowed to warm to room temperature overnight. Afterwards, the solvent was removed from the reaction mixture *in vacuo* and the yellowish, sticky residue ( $\text{TipPX}_2$ ) was extracted with *n*-hexane and subsequently the *n*-hexane was distilled off from the filtrate. The remaining yellow solid was dissolved in THF (100 mL). Anhydrous  $\text{ZnCl}_2$  (13.625 g, 100 mmol) was added to this solution and stirring at room temperature was continued overnight. Subsequently, the reaction was filtered over a celite-padded frit (G3), the volatiles were evaporated from the filtrate and the residue was extracted with fresh *n*-hexane (75 mL), resulting in a clear pale yellow solution. From this solution, *n*-hexane was distilled off, affording  $\text{TipPCl}_2$  (4.522g, 14.82 mmol, 49%) as an off-white crystalline solid.

**$^1\text{H}$  NMR** ( $\text{C}_6\text{D}_6$ , 400 MHz)  $\delta$  = 7.06 (d,  $^4J_{\text{PH}}$  = 3.5 Hz, 2H,  $\text{C}_{\text{Ar}}\text{H}$ ), 4.21 (hd,  $^3J_{\text{HH}}$  = 6.7 Hz,  $J_{\text{PH}}$  4.7 Hz, 2H, o- $\text{CH}(\text{CH}_3)_2$ ), 2.65 (hept,  $^3J_{\text{HH}}$  = 6.9 Hz, 1H, p- $\text{CH}(\text{CH}_3)_2$ ), 1.22 (d,  $^3J_{\text{HH}}$  = 6.8 Hz, 12H, o- $\text{CH}(\text{CH}_3)_2$ ), 1.10 (d,  $^3J_{\text{HH}}$  = 7.0 Hz, 6H, p- $\text{CH}(\text{CH}_3)_2$ ) ppm.  **$^{31}\text{P}$  NMR** ( $\text{C}_6\text{D}_6$ , 162 MHz)  $\delta$  = 164.84 ppm.

## 2.6 Bis-(2,4,6-trimethylphenyl)halophosphane ( $\text{Mes}_2\text{PX}$ )

$\text{MesBr}$  (10.0 g, 50.2 mmol) in THF (100 mL) was added dropwise to a suspension of magnesium turnings (1.34 g, 55 mmol) in THF (100 mL) at room temperature. The Grignard reaction started after ca. 30 minutes and was cooled to  $0^{\circ}\text{C}$ . Once the vigorous reaction ceased the mixture was refluxed for 4 h and the mixture was subsequently cooled to room temperature. The brownish clear solution was filtered through a canula fitted with a glass microfiber filter. Afterwards the filtrate solution was cooled to  $-78^{\circ}\text{C}$  and  $\text{PCl}_3$  (6.9 g, 50.2 mmol) was added dropwise. The mixture was allowed to warm to room temperature overnight and the volatiles were evaporated *in vacuo*. The remaining solid mixture was extracted with *n*-hexane (100 mL) and the filtrate was then concentrated to incipient crystallization. Storage at  $-30^{\circ}\text{C}$  for 24 h afforded  $\text{Mes}_2\text{PX}$  as a pale yellow crystalline solid (3.8 g,  $M_{\text{avg.}}$  = 324.56 g/mol; X = Cl 55.3%, Br 44.7%, 11.71 mmol, 46.6 % based on  $\text{MesBr}$ ).

**$^1\text{H}$  NMR** ( $\text{C}_6\text{D}_6$ , 400 MHz)  $\delta$  = 6.60 (m, 2H,  $\text{C}_{\text{Ar}}\text{H}$ ), 2.4-2.35 (m, 6H, o- $\text{C}_3$ ), 2.01 (3H, p- $\text{CH}_3$ ) ppm.  **$^{31}\text{P}$  NMR** ( $\text{C}_6\text{D}_6$ , 162 MHz)  $\delta$  = 85.4 ( $\text{Mes}_2\text{PCl}$ ), 74.9 ( $\text{Mes}_2\text{PBr}$ ) ppm.

## 3 Catalytic Trial Reactions

### 3.1 Catalysis with $\text{PEt}_3$

#### 3.1.1 Optimisation of the $\text{PEt}_3$ catalysed reductive coupling of $\text{TipPBr}_2$

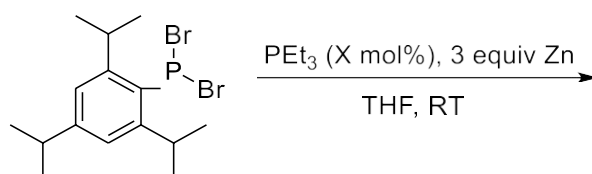

For each run, a suspension of 100 mg (0.25 mmol)  $\text{TipPBr}_2$  and 49 mg (0.75 mmol) zinc powder in THF (5 mL) was prepared. This suspension was cooled to  $-78\text{ }^\circ\text{C}$  and 70  $\mu\text{L}$  (0.05 mmol, 20 mol%), 35  $\mu\text{L}$  (0.025 mmol, 10 mol%) or 18  $\mu\text{L}$  (0.0125 mmol, 5 mol%) of a 0.71 M stock solution of  $\text{PEt}_3$  in THF were added, respectively. The reaction mixture was stirred at  $-78\text{ }^\circ\text{C}$  or at room temperature. For the NMR studies, 0.5 mL aliquots of each reaction were taken. The solvent was evaporated *in vacuo* and the solid residue was taken up in  $\text{C}_6\text{D}_6$  (0.5 mL). From the obtained  $^{31}\text{P}\{^1\text{H}\}$  NMR spectra the proportions of remaining  $\text{TipPBr}_2$  (A) and the products (B, C, D, E) formed are obtained by integrating the signals and normalization.

**Table S2.** Catalytic trials using x mol% of  $\text{PEt}_3$  as a catalyst in the reductive coupling of  $\text{TipPBr}_2$  in THF at room temperature using Zn dust as sacrificial reductant (best entries highlighted in yellow). All runs have been duplicated.

| $\text{PEt}_3$ [mol%] | T [ $^\circ\text{C}$ ]      | T [h] | $\text{TipPBr}_2$ [%] | $(\text{TipPBr})_2$ [%] | $(\text{PTip})_2$ [%] | $(\text{PTip})_3$ [%] | $(\text{PTip})_4$ [%] |
|-----------------------|-----------------------------|-------|-----------------------|-------------------------|-----------------------|-----------------------|-----------------------|
| 20                    | $-78\text{ }^\circ\text{C}$ | 1     | 64                    | 36                      | 0                     | 0                     | 0                     |
| 20                    | r.t.                        | 1     | 23                    | 77                      | 0                     | 0                     | 0                     |
| 20                    | r.t.                        | 16    | 0                     | 0                       | 36                    | 41                    | 23                    |
| 10                    | r.t.                        | 1     | 54                    | 46                      | 0                     | 0                     | 0                     |
| 10                    | r.t.                        | 3     | 31                    | 69                      | 0                     | 0                     | 0                     |
| 5                     | r.t.                        | 1     | 100                   | 0                       | 0                     | 0                     | 0                     |
| 5                     | r.t.                        | 16    | 42                    | 58                      | 0                     | 0                     | 0                     |

### 3.1.2 TipPBr<sub>2</sub> + PEt<sub>3</sub> (20 mol%)

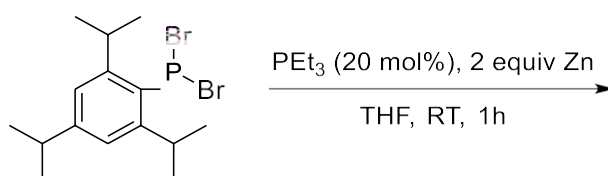

TipPBr<sub>2</sub> (0.100 g, 0.26 mmol) and zinc (0.049 g, 0.75 mmol) were dissolved in THF (2.5 mL). PEt<sub>3</sub> (0.5 mL, 0.1 M in THF) was slowly added to the stirring solution at room temperature. The mixture was allowed to stir under the exclusion of light for 1 h at room temperature. Afterwards the volatiles were evaporated. The <sup>31</sup>P NMR spectrum was measured immediately.

**Figure S1:** <sup>31</sup>P NMR spectrum of the reaction of TipPBr<sub>2</sub> with PEt<sub>3</sub> (20 mol%, 3 eq. Zn, 1 h). Δ TipPBr<sub>2</sub>, O (TipPBr)<sub>2</sub>.

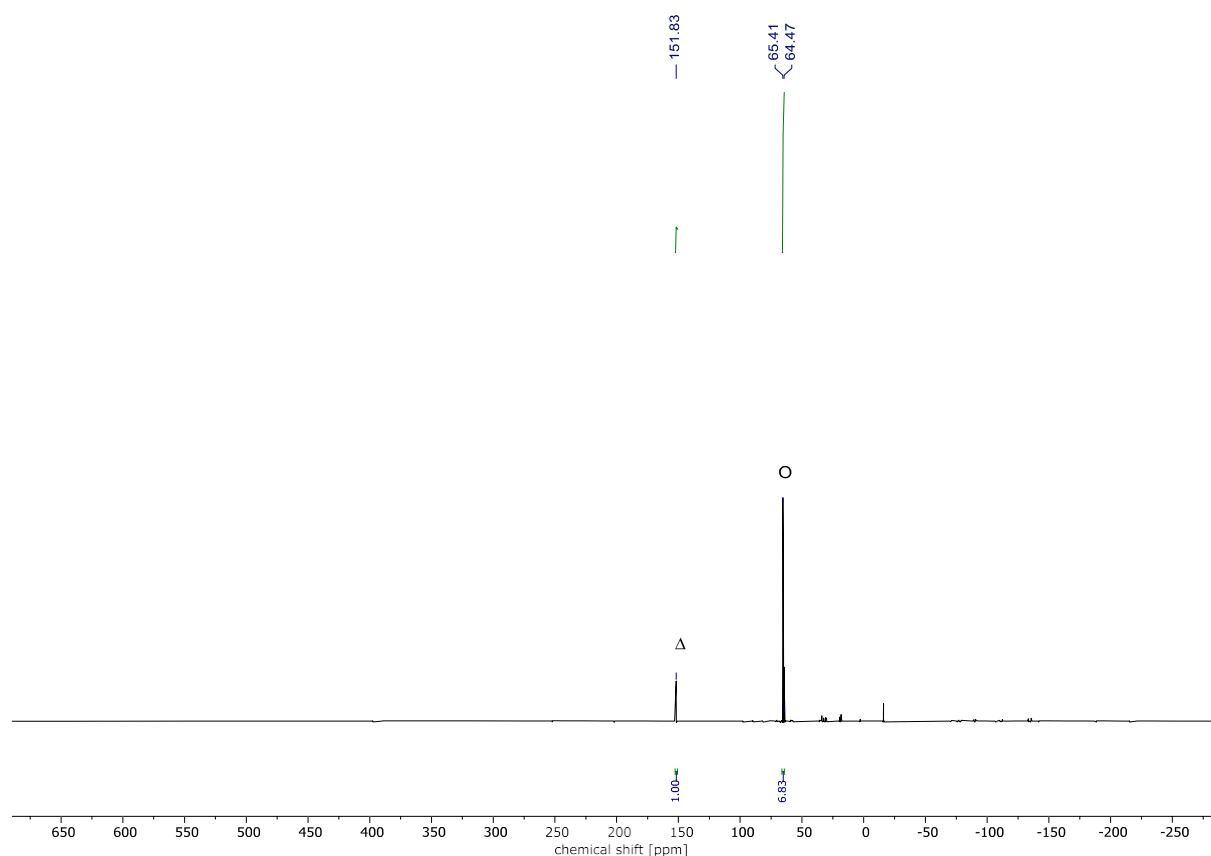

### 3.1.3 TipPBr<sub>2</sub> + PEt<sub>3</sub> (10 mol%)

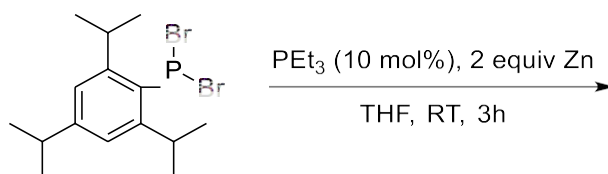

TipPBr<sub>2</sub> (197 mg, 0.5 mmol) and zinc (65.0 mg, 1 mmol) were dissolved in THF (2.5 mL). PEt<sub>3</sub> (0.5 ml, 0.1 M in THF) is slowly added to the stirring solution at room temperature. The mixture is allowed to stir under the exclusion of light for 3 hrs. Afterwards the volatiles were evaporated. The <sup>31</sup>P NMR spectrum was measured without delay.

**Figure S2:** <sup>31</sup>P NMR spectrum of the reaction of TipPBr<sub>2</sub> with PEt<sub>3</sub>. Δ TipPBr<sub>2</sub>, O (TipPBr)<sub>2</sub>, X unidentified side products.

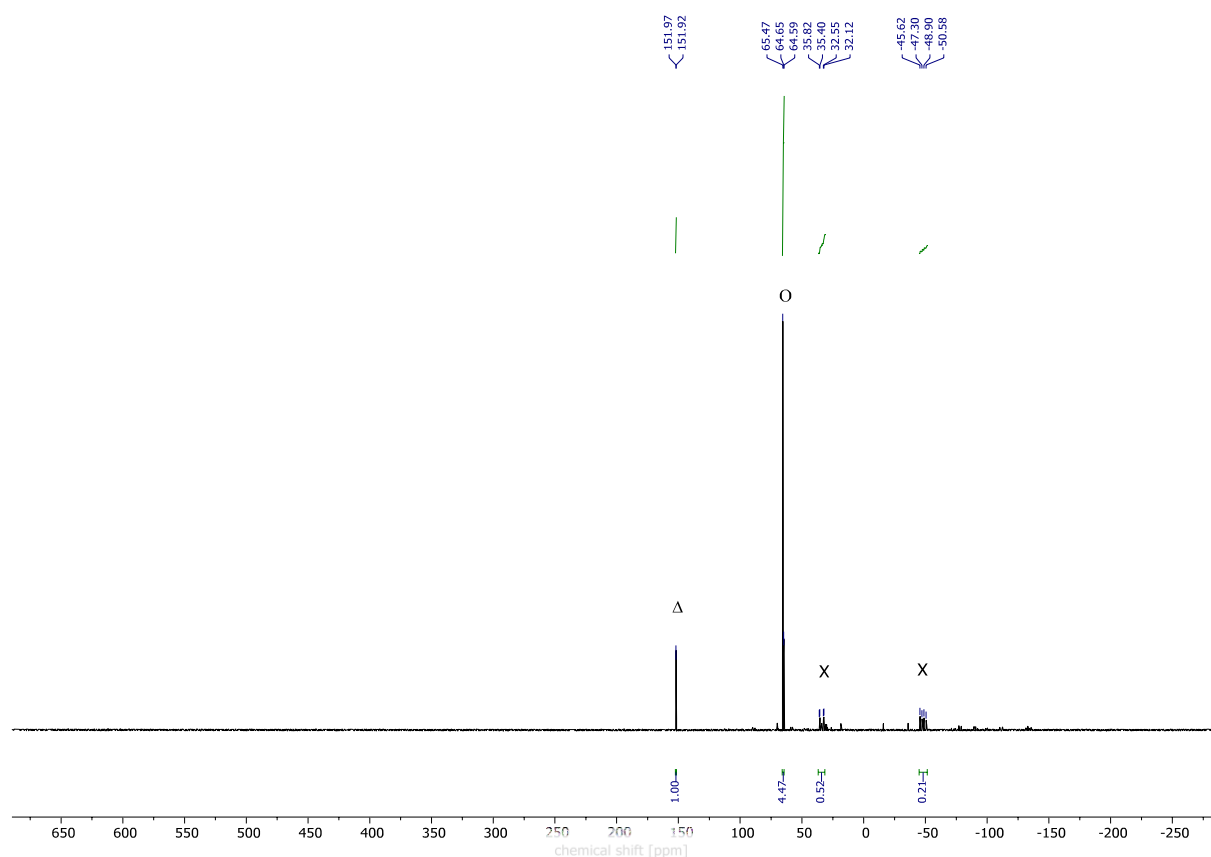

### 3.1.4 DipPBr<sub>2</sub> + PEt<sub>3</sub> (10 mol%)

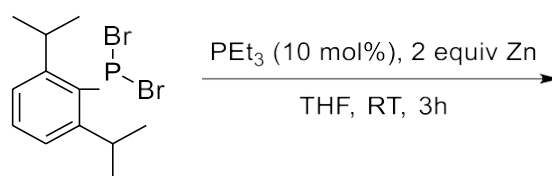

To DipPBr<sub>2</sub> (176 mg, 0.5 mmol) and zinc (65.0 mg, 1 mmol) THF (2 mL) was added. PEt<sub>3</sub> (0.5 ml, 0.1 M in THF, 0.05 mmol) is slowly added to the stirring solution at room temperature. The mixture was allowed to stir under the exclusion of light for 3 h. Afterwards the volatiles were evaporated. The <sup>31</sup>P NMR spectrum was measured immediately.

**Figure S3:** <sup>31</sup>P NMR spectrum of the reaction of DipPBr<sub>2</sub> with PEt<sub>3</sub> (10 mol%, 2 eq. Zn, 3 h). Δ Dip<sub>2</sub>P<sub>2</sub>, O unidentified side product, Φ Dip<sub>4</sub>P<sub>4</sub>, β Dip<sub>3</sub>P<sub>3</sub>.

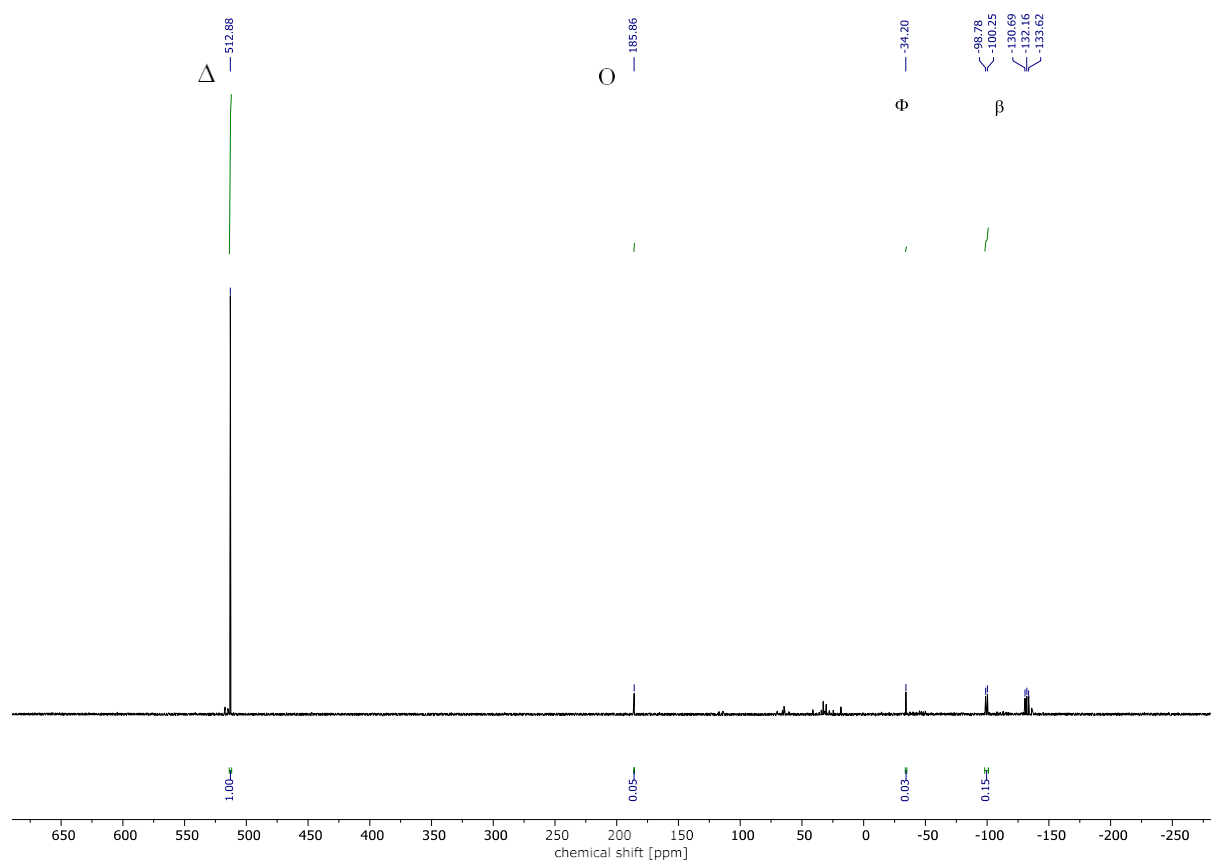

### 3.1.5 DipPCl<sub>2</sub> + PEt<sub>3</sub> (10 mol%)

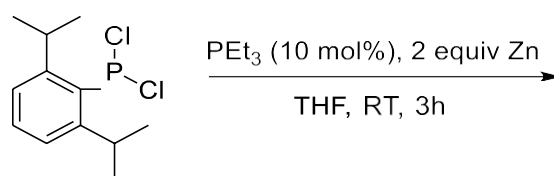

To DipPCl<sub>2</sub> (132 mg, 0.5 mmol) and zinc (65.0 mg, 1 mmol) THF (2 mL) was added. PEt<sub>3</sub> (0.5 ml, 0.1 M in THF, 0.05 mmol) was slowly added to the stirring solution at room temperature. The mixture was allowed to stir under the exclusion of light for 3 h. Afterwards the volatiles were evaporated. The <sup>31</sup>P NMR spectrum was measured immediately.

**Figure S4:** <sup>31</sup>P NMR spectrum of the reaction of DipPCl<sub>2</sub> with PEt<sub>3</sub>. Δ DipPCl<sub>2</sub>, O (DipPCl)<sub>2</sub>, Φ Dip<sub>4</sub>P<sub>4</sub>, β Dip<sub>3</sub>P<sub>3</sub>, X unidentified side products.

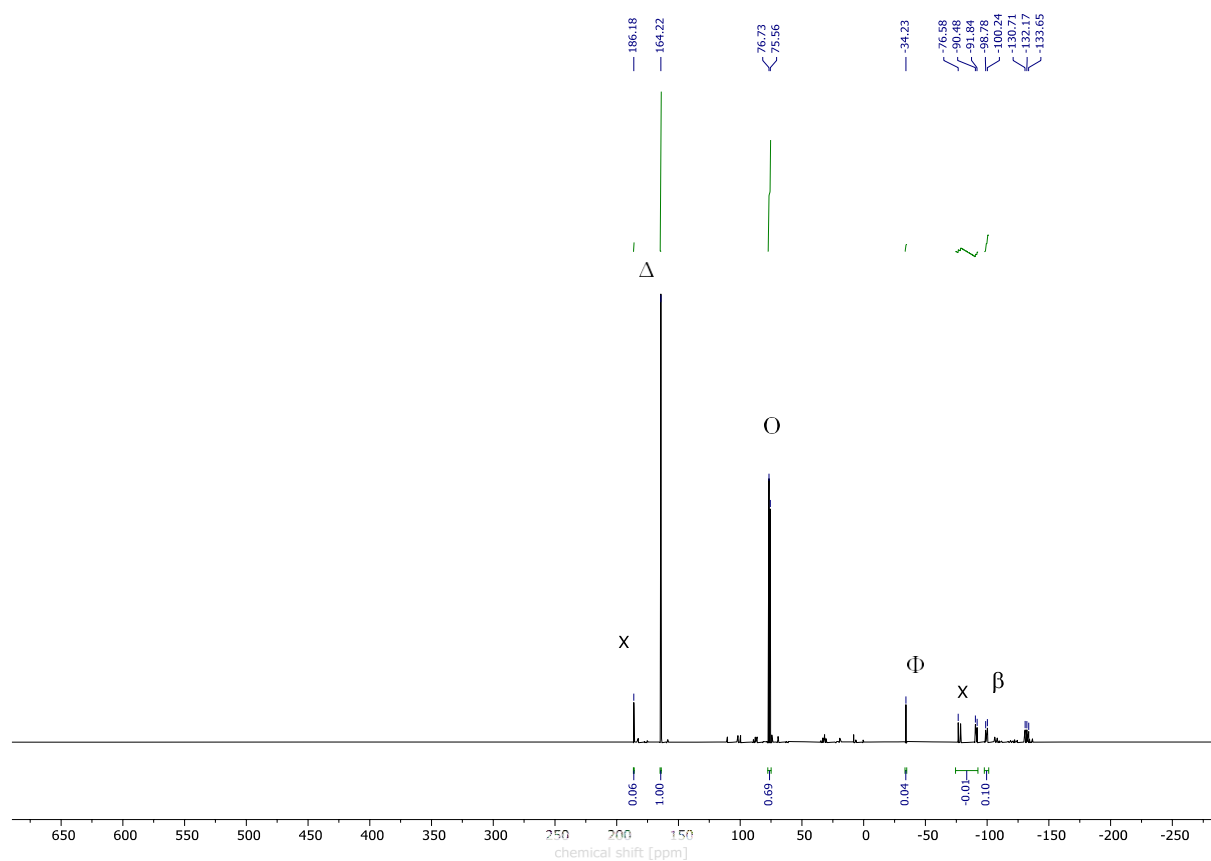

### 3.1.6 TipPCl<sub>2</sub> + PEt<sub>3</sub> (10 mol%)

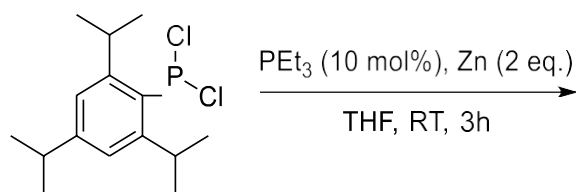

To TipPCl<sub>2</sub> (153 mg, 0.5 mmol) and zinc (65.0 mg, 1 mmol) THF (2 mL) was added. PEt<sub>3</sub> (0.5 mL, 0.1 M in THF) was slowly added to the stirring solution at room temperature. The mixture was allowed to stir under the exclusion of light for 3 h. Afterwards the volatiles were evaporated. The <sup>31</sup>P NMR spectrum was measured immediately.

**Figure S5:** <sup>31</sup>P NMR spectrum of the reaction of TipCl<sub>2</sub> with PEt<sub>3</sub>. Δ TipPCl<sub>2</sub>, O (TipPCl)<sub>2</sub>, Φ Tip<sub>4</sub>P<sub>4</sub>, β Tip<sub>3</sub>P<sub>3</sub>, X unidentified side products.

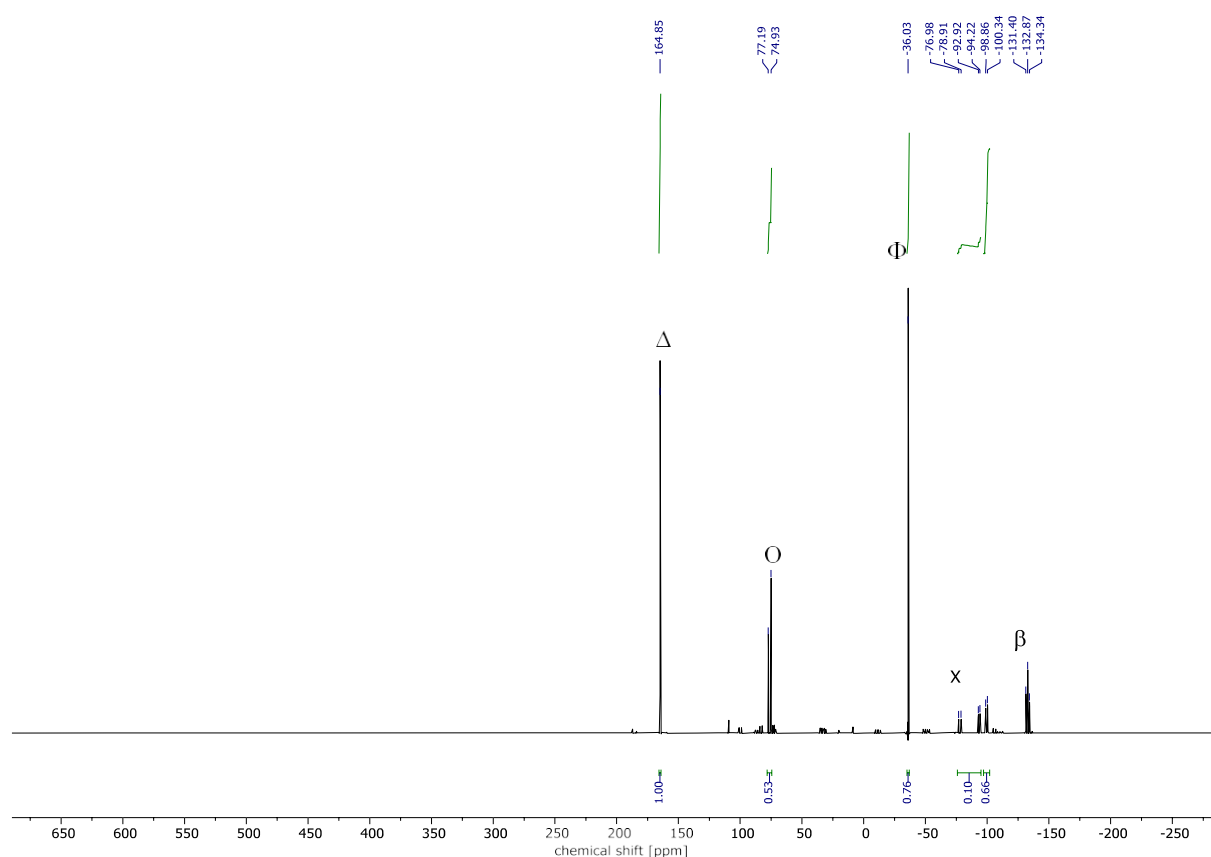

### 3.1.7 PhPCl<sub>2</sub> + PEt<sub>3</sub> (10 mol%)

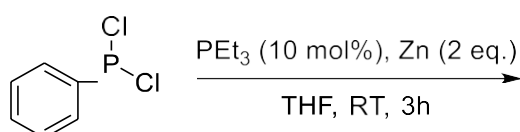

To PhPCl<sub>2</sub> (84 mg, 0.47 mmol) and zinc (65.0 mg, 1 mmol) THF (2.5 mL) was added. PEt<sub>3</sub> (0.47 mL, 0.1 M in THF) was slowly added to the stirring solution at room temperature.

The mixture was allowed to stir under the exclusion of light for 3 h. Afterwards the volatiles were evaporated. The  $^{31}\text{P}$  NMR spectrum was measured immediately.

**Figure S6:**  $^{31}\text{P}$  NMR spectrum of the reaction of  $\text{PhPCl}_2$  with  $\text{PEt}_3$ .  $\Delta$   $\text{PhPCl}_2$ , O  $(\text{PhPCl})_2$ , X unidentified side products.

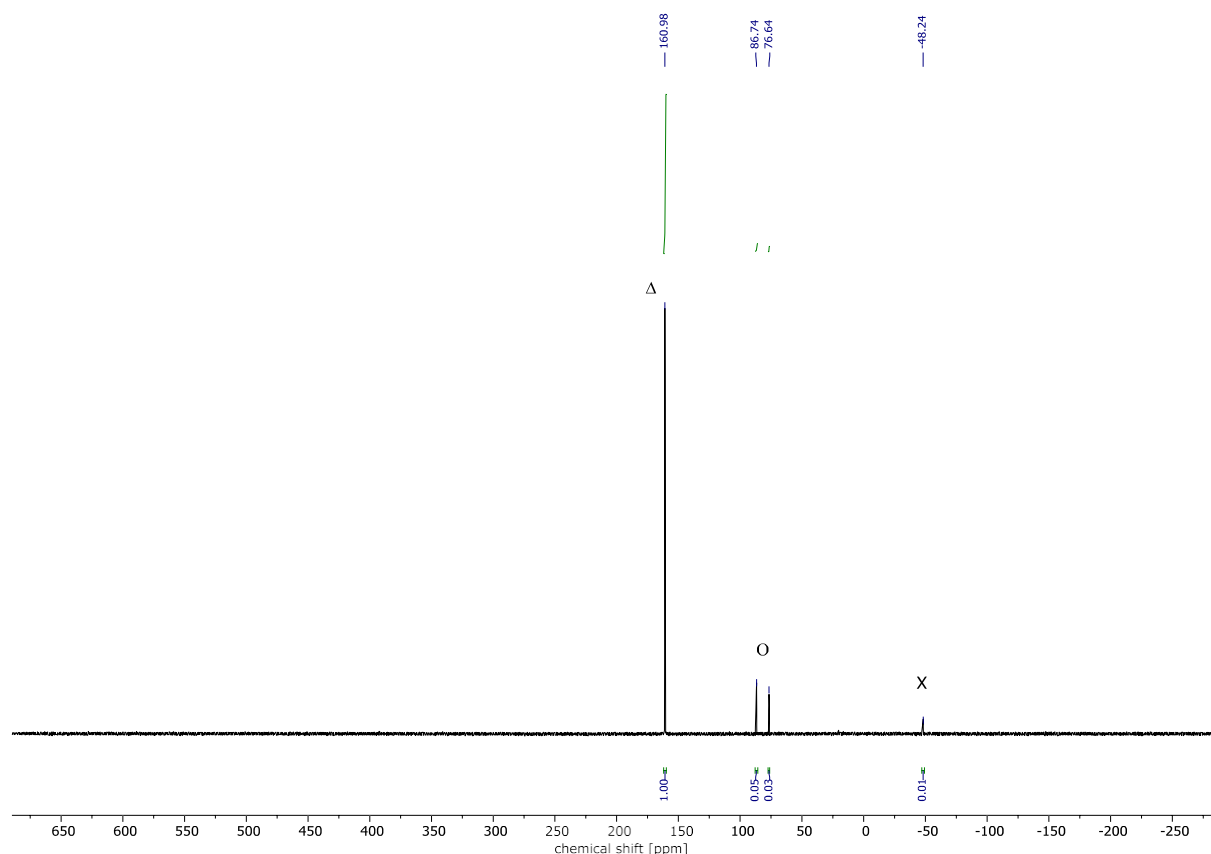

### 3.1.8 $\text{Mes}_2\text{PX}$ (X = Cl, Br) + $\text{PEt}_3$ (10 mol%)

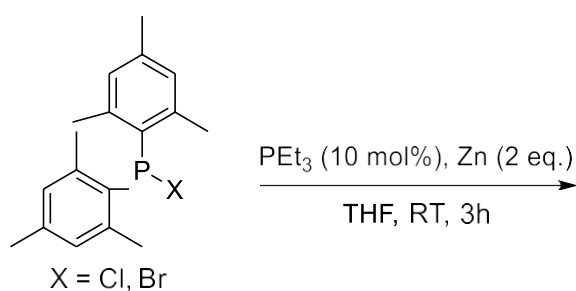

To  $\text{Mes}_2\text{PX}$  (X = Cl, Br) (119 mg, 0.5 mmol) and zinc (65.0 mg, 1 mmol) THF (2 mL) was added.  $\text{PEt}_3$  (0.5 mL, 0.1 M in THF) was slowly added to the stirring solution at room temperature. The mixture was allowed to stir under the exclusion of light for 3 h. Afterwards the volatiles were evaporated. The  $^{31}\text{P}$  NMR spectrum was measured immediately.

**Figure S7:**  $^{31}\text{P}$  NMR spectrum of the reaction of  $\text{Mes}_2\text{PX}$  with  $\text{PEt}_3$ .  $\Delta$   $\text{Mes}_2\text{PX}$ , O  $(\text{Mes}_2\text{P})_2$ , X unidentified side products.

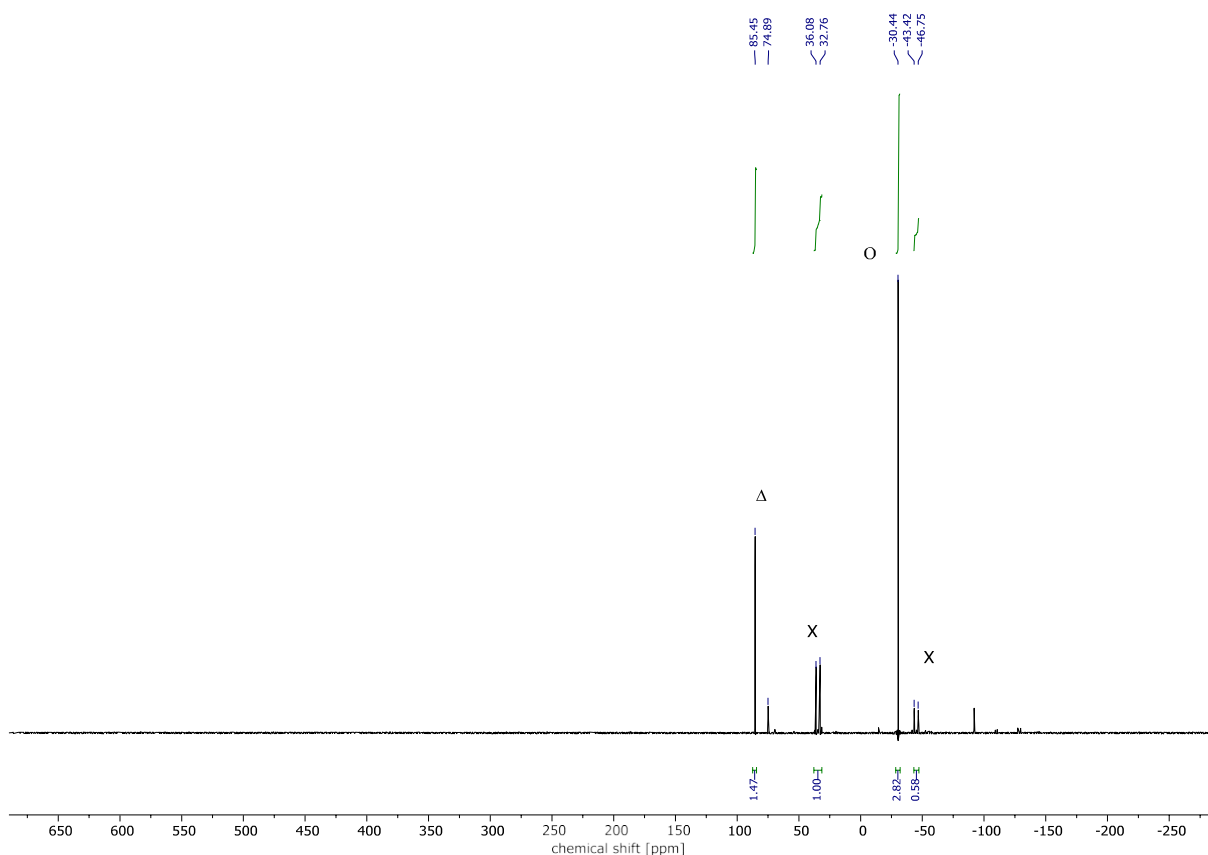

## 3.2 Catalysis with $[\text{BrPEt}_3]\text{Br}$

### 3.2.1 $\text{TipPBr}_2 + [\text{BrPEt}_3]\text{Br}$ (10 mol%)

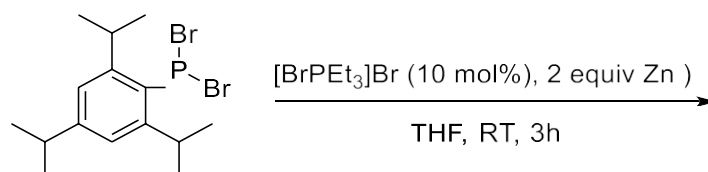

$\text{TipPBr}_2$  (0.197 g, 0.5 mmol),  $[\text{BrPEt}_3]\text{Br}$  (0.014 mg, 0.05 mmol) and zinc (0.064 mg, 1 mmol) were dissolved in THF (2.5 mL). The mixture was allowed to stir under the exclusion of light for 3 h. Afterwards the volatiles were evaporated. The  $^{31}\text{P}$  NMR spectrum was measured immediately.

**Figure S8:**  $^{31}\text{P}$  NMR spectrum of the reaction of  $\text{TipPBr}_2$  with  $\text{Br}_2\text{PEt}_3$ .  $\Delta$   $\text{TipPBr}_2$ , O  $(\text{TipPBr})_2$ ,  $\alpha$   $\text{Tip}_4\text{P}_4$ , X unidentified side products.

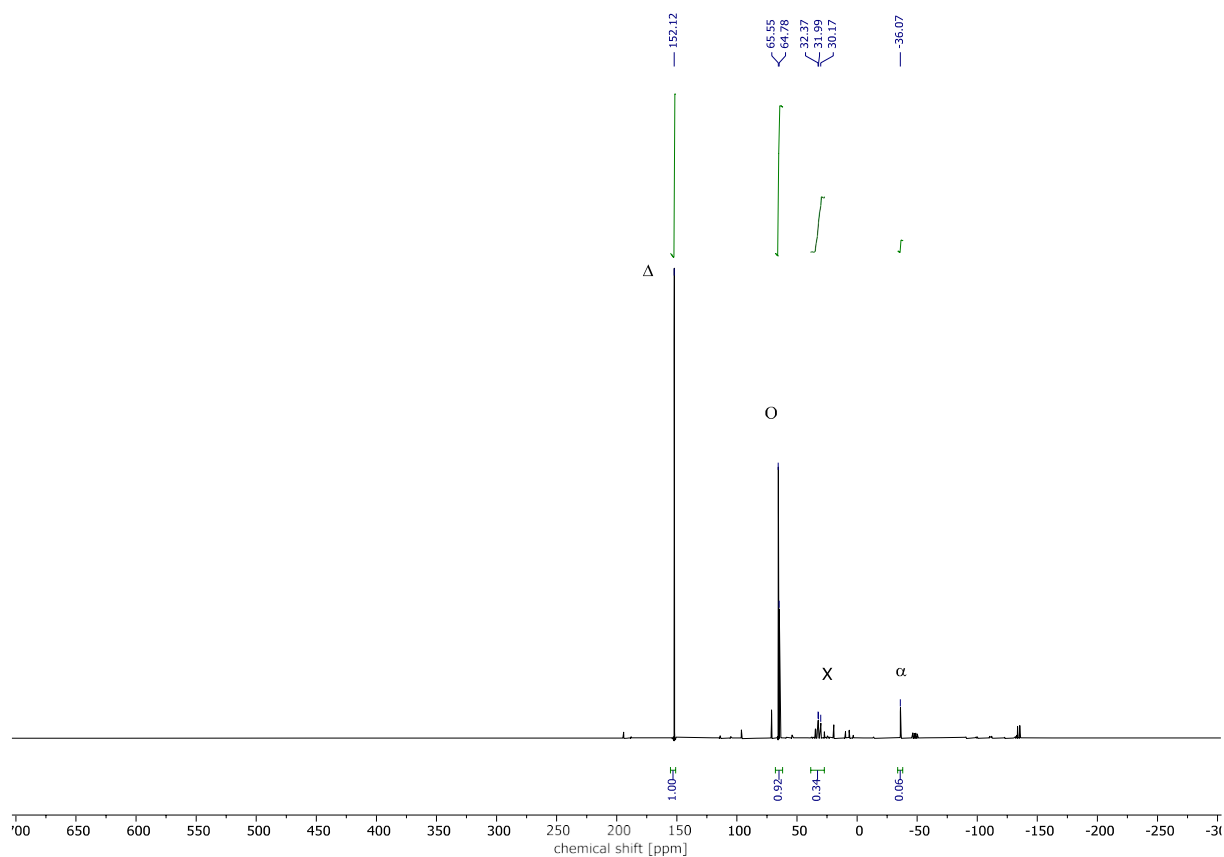

### 3.2.2 $\text{DipPBr}_2 + [\text{BrPEt}_3]\text{Br}$ (10 mol%)

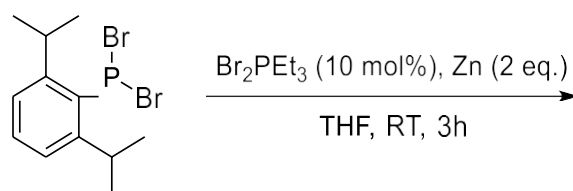

$\text{DipPBr}_2$  (198 mg, 0.56 mmol),  $[\text{BrPEt}_3]\text{Br}$  (15.5 mg, 0.056 mmol) and zinc (70 mg, 1.1 mmol) were dissolved in THF (2.5 mL). The mixture was allowed to stir under the exclusion of light for 3 h. Afterwards the volatiles were evaporated. The  $^{31}\text{P}$  NMR spectrum was measured immediately.

**Figure S9:**  $^{31}\text{P}$  NMR spectrum of the reaction of  $\text{DipPBr}_2$  with  $\text{Br}_2\text{PEt}_3$ .  $\Delta$   $\text{DipPBr}_2$ , O  $(\text{DipPBr})_2$ ,  $\alpha$   $\text{Dip}_4\text{P}_4$ ,  $\beta$   $\text{Dip}_3\text{P}_3$ , X unidentified side products.

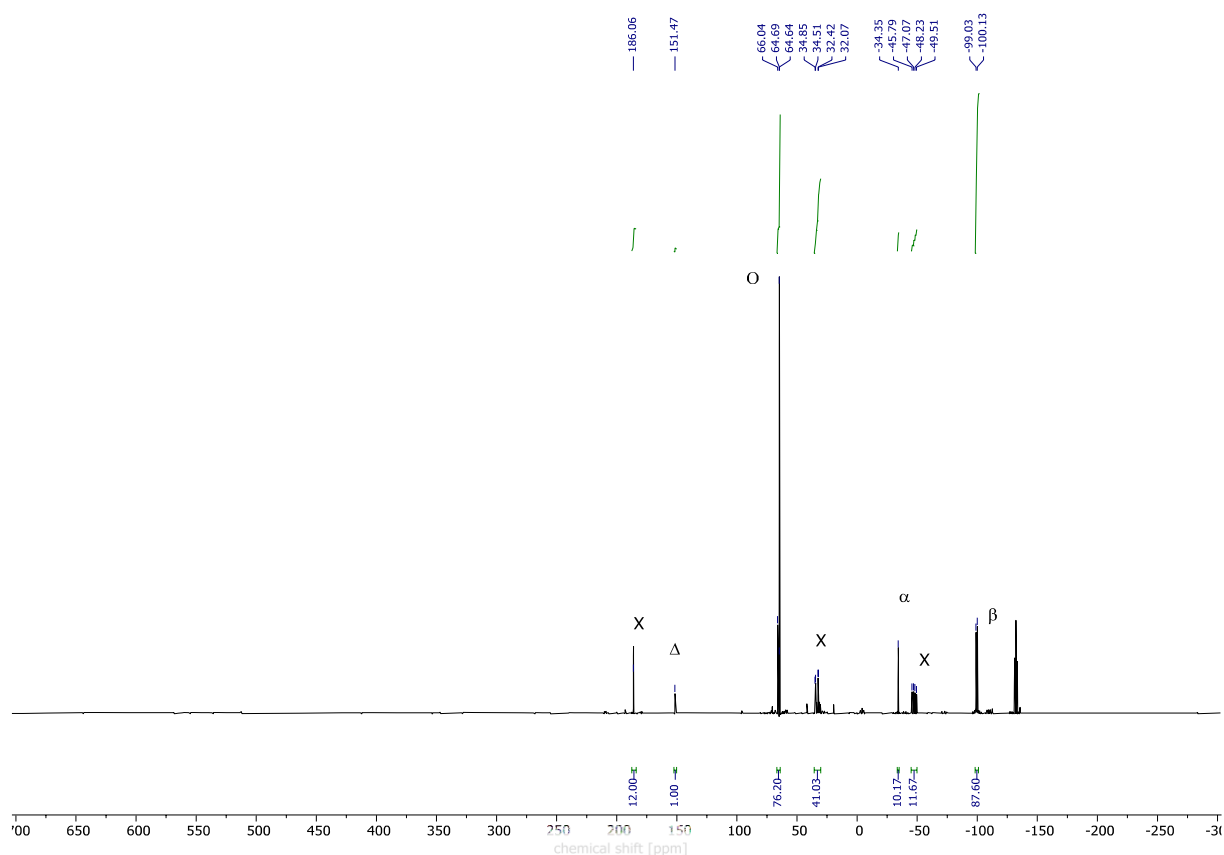

### 3.2.3 $\text{TipPCl}_2$ + $[\text{BrPEt}_3]\text{Br}$ (10 mol%)

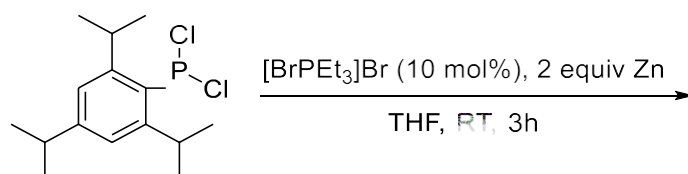

$\text{TipPCl}_2$  (176 mg, 0.5 mmol),  $[\text{BrPEt}_3]\text{Br}$  (13.9 mg, 0.05 mmol) and zinc (65.0 mg, 1 mmol) were dissolved in THF (2.5 mL). The mixture was allowed to stir under the exclusion of light for 3 h. Afterwards the volatiles were evaporated. The  $^{31}\text{P}$  NMR spectrum was measured immediately.

**Figure S10:**  $^{31}\text{P}$  NMR spectrum of the reaction of  $\text{TipPCl}_2$  with  $[\text{BrPEt}_3]\text{Br}$ .  $\Delta$   $\text{TipPCl}_2$ ,  $\text{O}$   $\text{TipPBrCl}$ ,  $\alpha$   $(\text{TipPCl})_2$ .

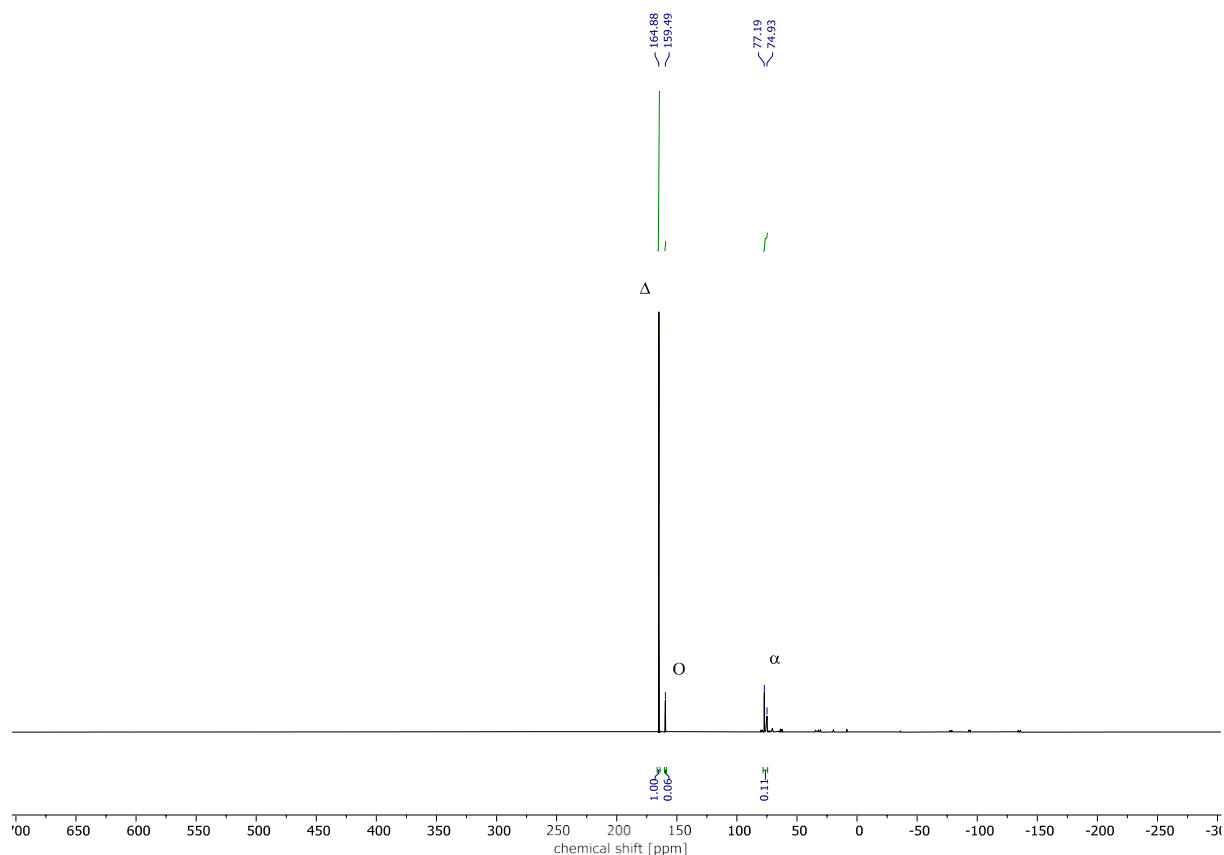

### 3.2.4 $\text{DipPCl}_2 + [\text{BrPEt}_3]\text{Br}$ (10 mol%)

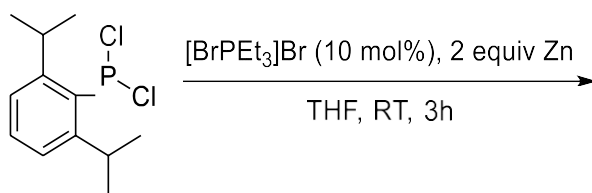

$\text{DipPCl}_2$  (0.126 g, 0.48 mmol),  $[\text{BrPEt}_3]\text{Br}$  (0.013 mg, 0.048 mmol) and zinc (0.064 g, 1 mmol) were dissolved in THF (2.5 mL). The mixture was allowed to stir under the exclusion of light for 3 h. Afterwards the volatiles were evaporated. The  $^{31}\text{P}$  NMR spectrum was measured immediately.

**Figure S11:**  $^{31}\text{P}$  NMR spectrum of the reaction of  $\text{DipPCl}_2$  with  $[\text{BrPEt}_3]\text{Br}$ .  $\Delta$   $\text{DipPCl}_2$ ,  $\text{O}$   $\text{DipPBrCl}$ ,  $\beta$   $(\text{DipPCl})_2$  and  $\alpha$   $\text{Dip}_4\text{P}_4$ .

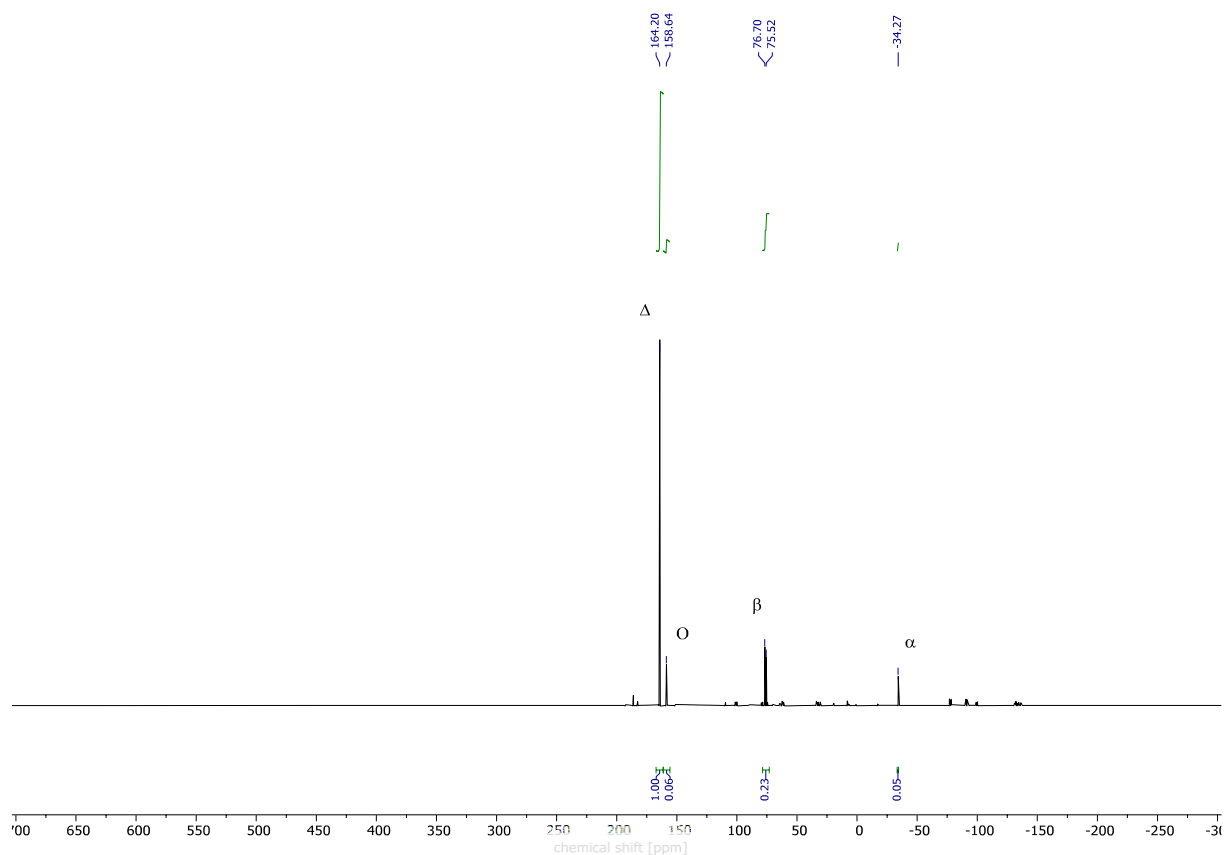

### 3.3 Catalysis with $\text{PMe}_3$

#### 3.3.1 $\text{TipPBr}_2 + \text{PMe}_3$ (10 mol%)

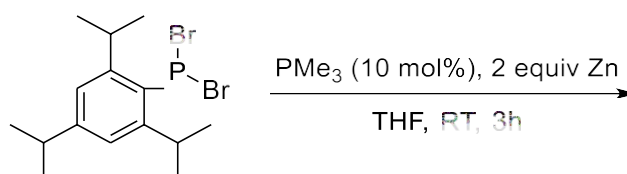

$\text{TipPBr}_2$  (197 mg, 0.5 mmol) and zinc (65.0 mg, 1 mmol) were dissolved in THF (2.5 mL).  $\text{PMe}_3$  (0.5 mL, 0.1 M in THF) was slowly added to the stirring solution at room temperature. The mixture was allowed to stir under the exclusion of light for 3 h. Afterwards the volatiles were evaporated. The  $^{31}\text{P}$  NMR spectrum was measured immediately.

**Figure S12:**  $^{31}\text{P}$  NMR spectrum of the reaction of  $\text{TipPBr}_2$  with  $\text{PMe}_3$ .  $\Delta$   $\text{TipPBr}_2$ , O  $(\text{TipPBr})_2$ ,  $\alpha$   $\text{Tip}_4\text{P}_4$ ,  $\beta$   $\text{Tip}_3\text{P}_3$ , X unidentified side products.

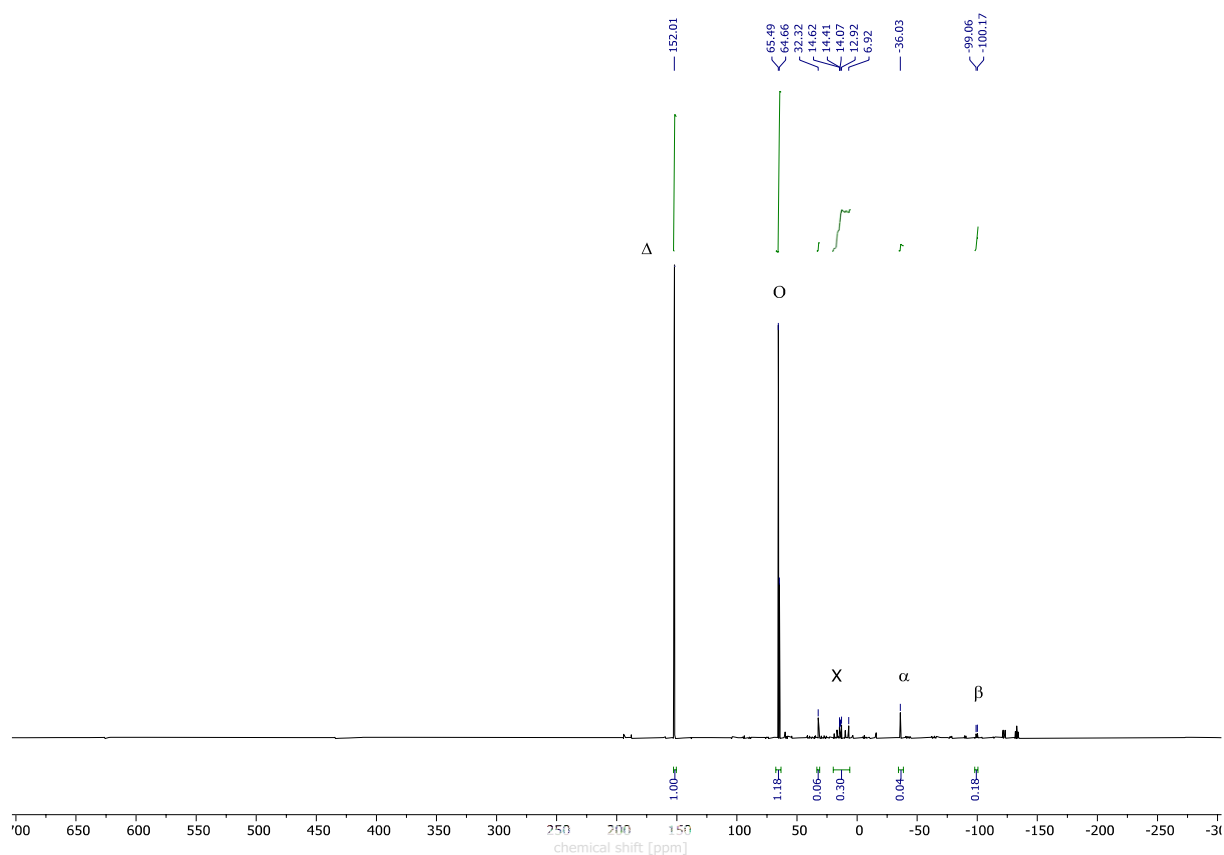

### 3.3.2 $\text{DipPBr}_2 + \text{PMe}_3$ (10 mol%)

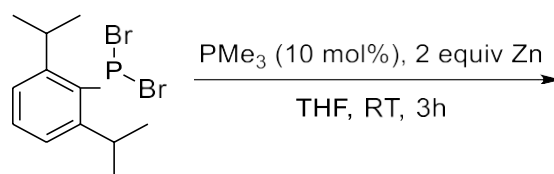

$\text{DipPBr}_2$  (204 mg, 0.58 mmol) and zinc (73.6 mg, 1.16 mmol) were dissolved in THF (2.5 mL).  $\text{PMe}_3$  (0.58 mL, 0.1 M in THF) was slowly added to the stirring solution at room temperature. The mixture was allowed to stir under the exclusion of light for 3 h. Afterwards the volatiles were evaporated. The  $^{31}\text{P}$  NMR spectrum was measured immediately.

**Figure S13:**  $^{31}\text{P}$  NMR spectrum of the reaction of  $\text{DipPBr}_2$  with  $\text{PMe}_3$ .  $\Delta$   $\text{DipPBr}_2$ , O  $(\text{DipPBr})_2$ ,  $\alpha$   $\text{Dip}_4\text{P}_4$ ,  $\beta$   $\text{Dip}_3\text{P}_3$ , X unidentified side products.

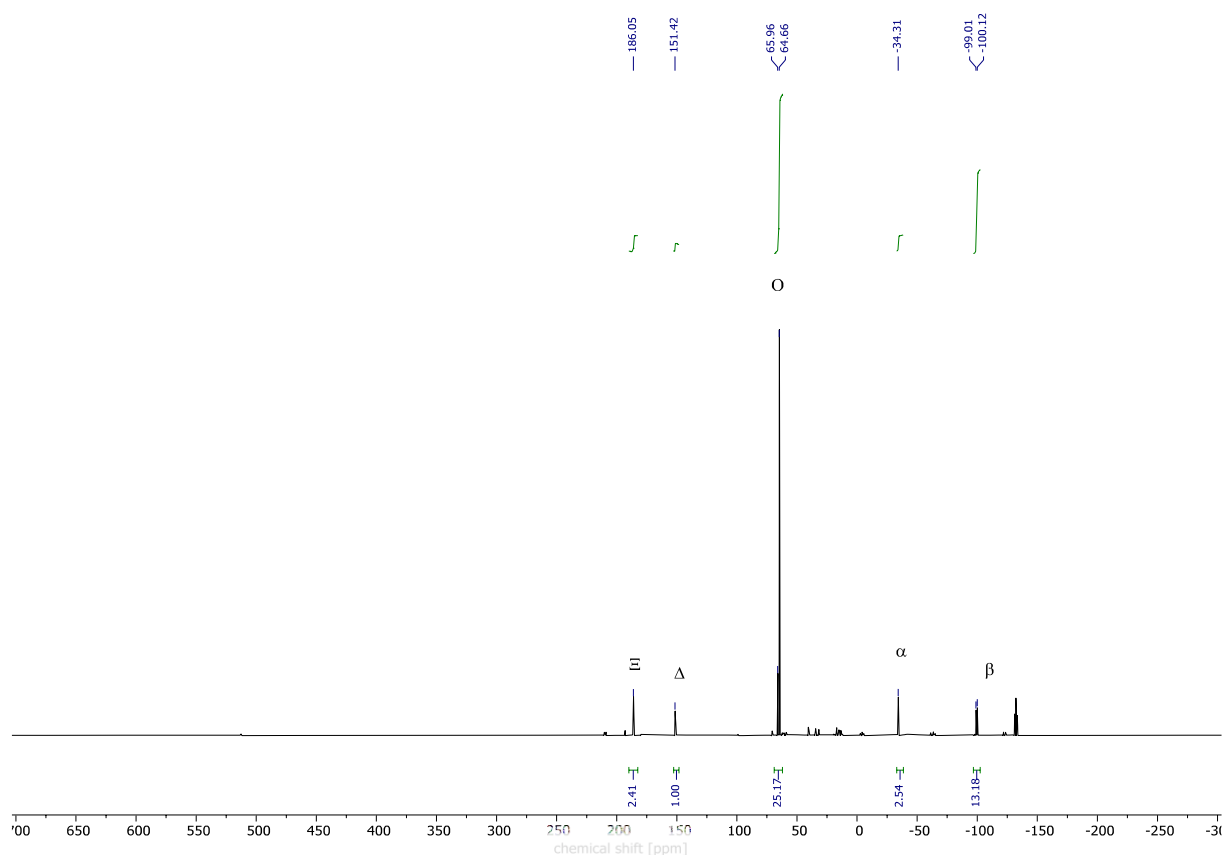

### 3.3.3 $\text{TipPCl}_2 + \text{PMe}_3$ (10 mol%)

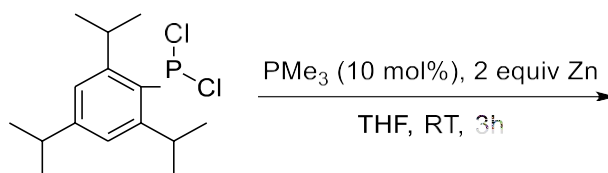

$\text{TipPCl}_2$  (153 mg, 0.5 mmol) and zinc (65.0 mg, 1 mmol) were dissolved in THF (2.5 mL).  $\text{PMe}_3$  (0.5 ml, 0.1 M in THF) is slowly added to the stirring solution at room temperature. The mixture was allowed to stir under the exclusion of light for 3 h. Afterwards the volatiles were evaporated. The  $^{31}\text{P}$  NMR spectrum was measured immediately.

**Figure S14:**  $^{31}\text{P}$  NMR spectrum of the reaction of  $\text{TipPCl}_2$  with  $\text{PMe}_3$ .  $\Delta$   $\text{TipPCl}_2$ , O  $(\text{TipPCl})_2$ ,  $\alpha$   $\text{Tip}_4\text{P}_4$ , X unidentified side products.

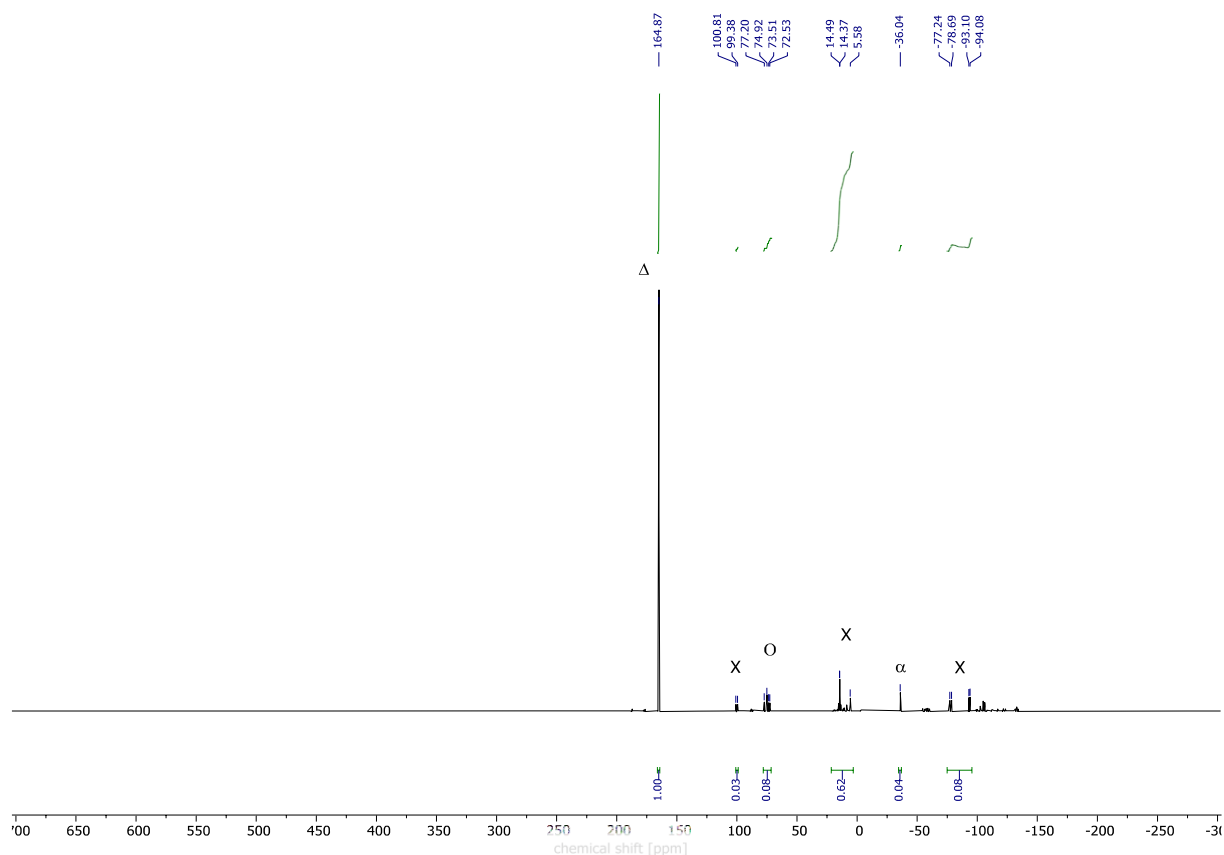

### 3.3.4 $\text{DipPCl}_2 + \text{PMe}_3$ (10 mol%)

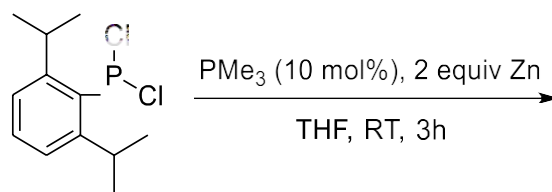

$\text{DipPCl}_2$  (0.132 g, 0.5 mmol) and zinc (0.064 mg, 1 mmol) were dissolved in THF (2.5 mL).  $\text{PMe}_3$  (0.5 mL, 0.1 M in THF) was slowly added to the stirring solution at room temperature. The mixture was allowed to stir under the exclusion of light for 3 h. Afterwards the volatiles were evaporated. The  $^{31}\text{P}$  NMR spectrum was measured immediately.

**Figure S15:**  $^{31}\text{P}$  NMR spectrum of the reaction of  $\text{DipPCl}_2$  with  $\text{PMe}_3$ .  $\Delta$   $\text{DipPCl}_2$ , O  $(\text{DipPCl})_2$ ,  $\alpha$   $\text{Dip}_4\text{P}_4$ ,  $\beta$   $\text{Dip}_3\text{P}_3$ , X unidentified side products.

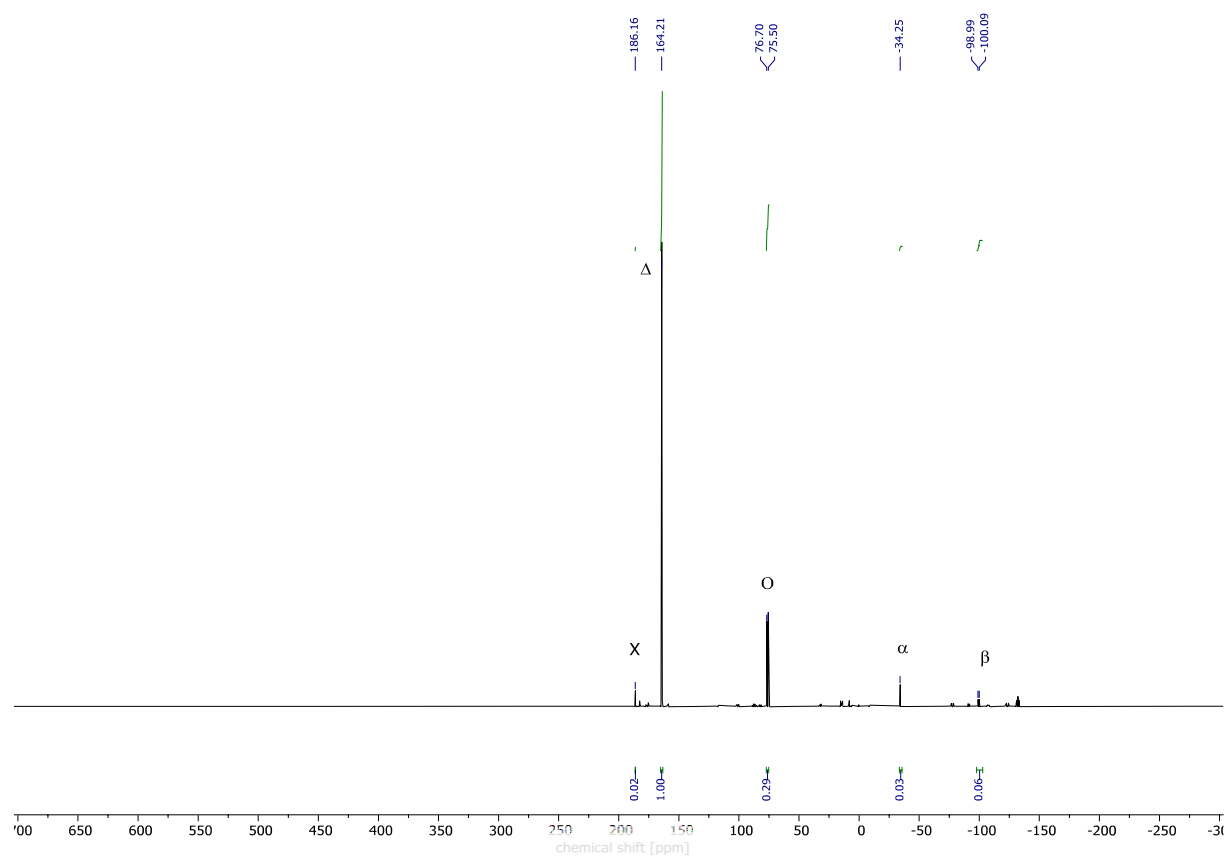

### 3.4 Catalysis with $\text{Cl}_2\text{PMe}_3$

#### 3.4.1 $\text{TipPBr}_2 + \text{Cl}_2\text{PMe}_3$ (10 mol%)

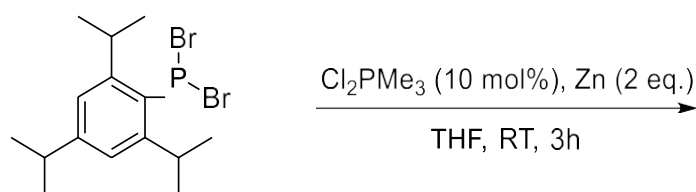

$\text{TipPBr}_2$  (197 mg, 0.5 mmol),  $\text{Cl}_2\text{PMe}_3$  (7.6 mg, 0.05 mmol) and zinc (65.0 mg, 1 mmol) were dissolved in THF (2.5 mL). The mixture was allowed to stir under the exclusion of light for 3 hrs. Afterwards the volatiles were evaporated. The  $^{31}\text{P}$  NMR spectrum was measured immediately.

**Figure S16:**  $^{31}\text{P}$  NMR spectrum of the reaction of  $\text{TipPBr}_2$  with  $\text{Cl}_2\text{PMe}_3$ .  $\Delta$   $\text{TipPBrCl}$ , O  $\text{TipPBr}_2$ ,  $\eta$  ( $\text{TipPCl}$ ) $_2$ ,  $\beta$  ( $\text{TipPBr}$ ) $_2$ ,  $\alpha$   $\text{Tip}_4\text{P}_4$ ,  $\chi$   $\text{Tip}_3\text{P}_3$ , X unidentified side products.

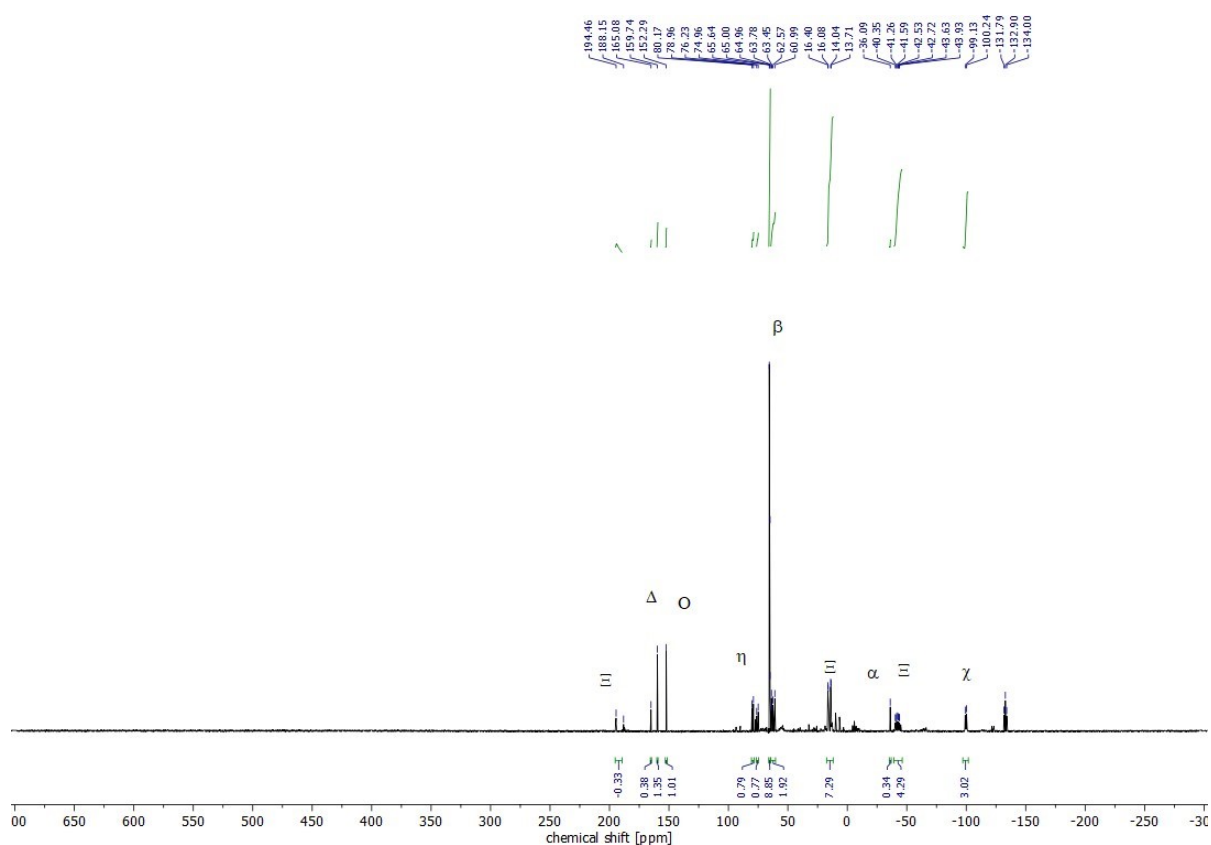

### 3.4.2 DipPBr<sub>2</sub> + Cl<sub>2</sub>PMe<sub>3</sub> (10 mol%)

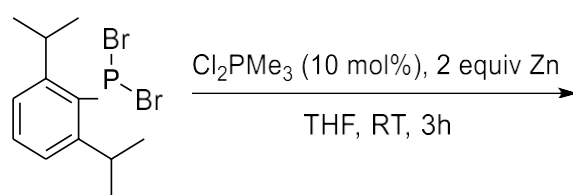

DipPBr<sub>2</sub> (176 mg, 0.5 mmol), Cl<sub>2</sub>PMe<sub>3</sub> (7.6 mg, 0.05 mmol) and zinc (65.0 mg, 1 mmol) were dissolved in THF (2.5 mL). The mixture was allowed to stir under the exclusion of light for 3 h. Afterwards the volatiles were evaporated. The <sup>31</sup>P NMR spectrum was measured immediately.

**Figure S17:** <sup>31</sup>P NMR spectrum of the reaction of DipPBr<sub>2</sub> with Cl<sub>2</sub>PMe<sub>3</sub>. Δ DipPBrCl, O DipPBr<sub>2</sub>, F (DipPBr)<sub>2</sub>, β Dip<sub>4</sub>P<sub>4</sub>, η Dip<sub>3</sub>P<sub>3</sub>, X unidentified side products.

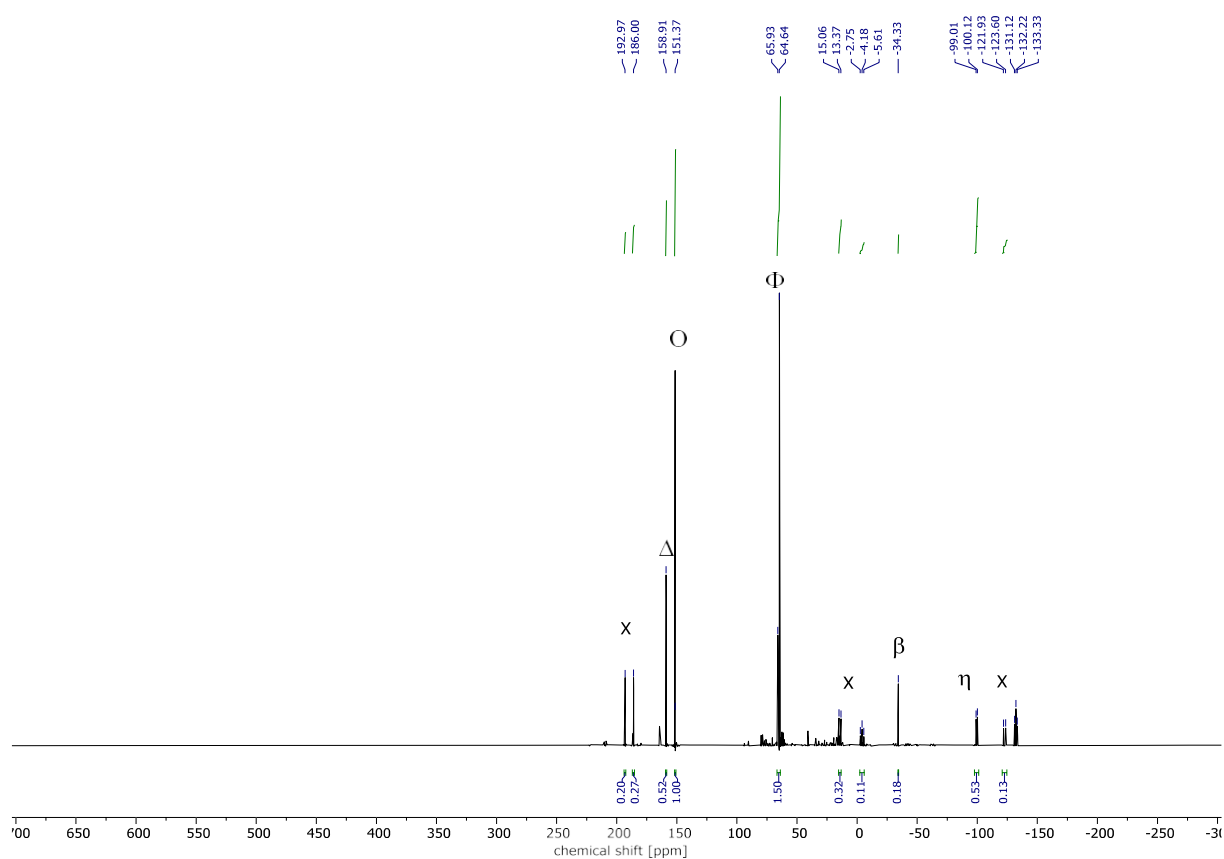

### 3.4.3 TipPCl<sub>2</sub> + Cl<sub>2</sub>PMe<sub>3</sub> (10 mol%)

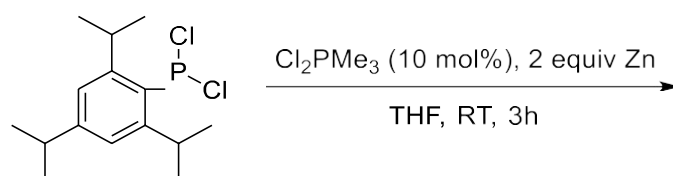

TipPCl<sub>2</sub> (153 mg, 0.5 mmol), Cl<sub>2</sub>PMe<sub>3</sub> (7.6 mg, 0.05 mmol) and zinc (65.0 mg, 1 mmol) were dissolved in THF (2.5 mL). The mixture was allowed to stir under the exclusion of light for 3 h. Afterwards the volatiles were evaporated. The <sup>31</sup>P NMR spectrum was measured immediately.

**Figure S18:** <sup>31</sup>P NMR spectrum of the reaction of TipPCl<sub>2</sub> with Cl<sub>2</sub>PMe<sub>3</sub>. Δ TipPCl<sub>2</sub>, O Tip<sub>4</sub>P<sub>4</sub>, X unidentified side products.

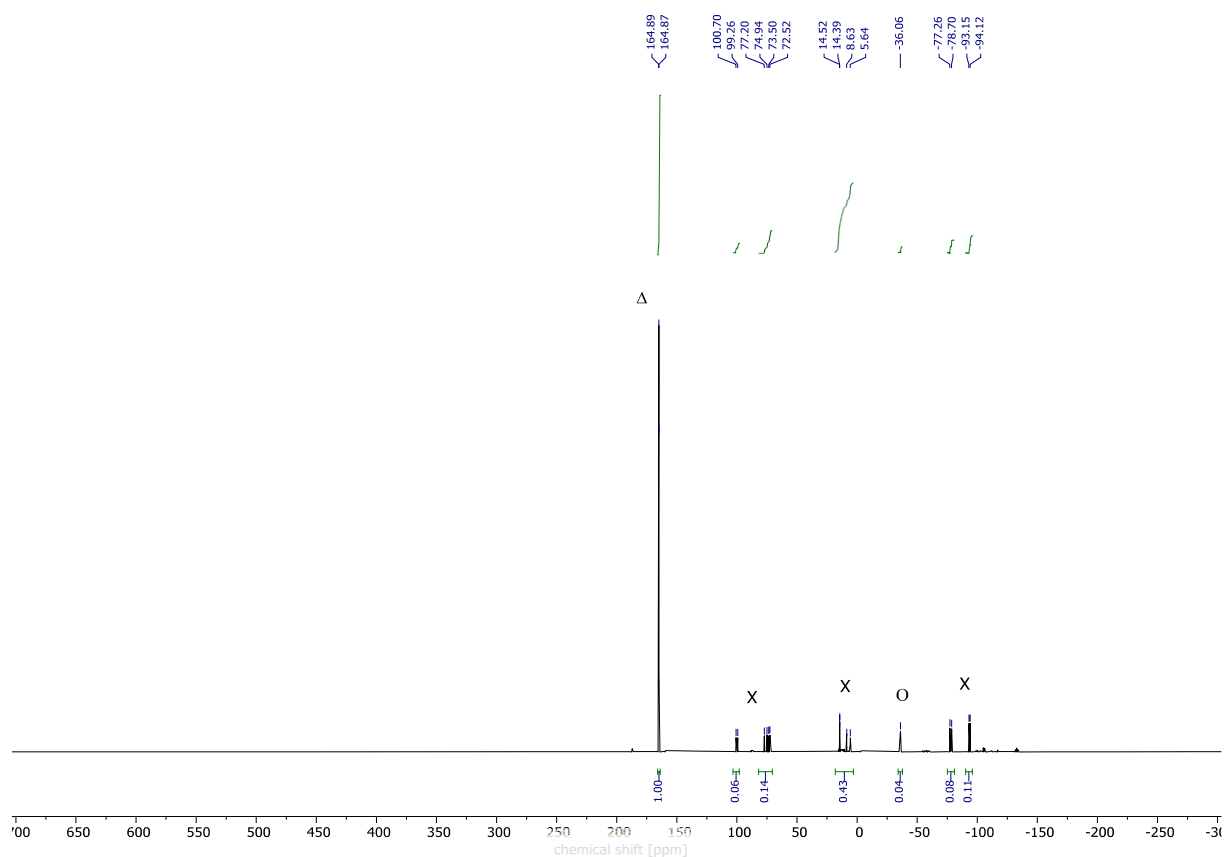

### 3.4.4 DipPCl<sub>2</sub> + Cl<sub>2</sub>PMe<sub>3</sub> (10 mol%)

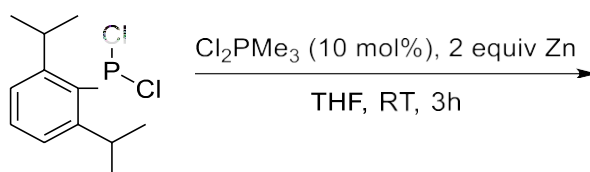

DipPCl<sub>2</sub> (176 mg, 0.5 mmol), Cl<sub>2</sub>PMe<sub>3</sub> (7.6 mg, 0.05 mmol) and zinc (65.0 mg, 1 mmol) were dissolved in THF (2.5 mL). The mixture was allowed to stir under the exclusion of light for 3 hrs. Afterwards the volatiles were evaporated. The <sup>31</sup>P NMR spectrum was measured immediately.

**Figure S19:** <sup>31</sup>P NMR spectrum of the reaction of DipPCl<sub>2</sub> with Cl<sub>2</sub>PMe<sub>3</sub>. Δ DipPCl<sub>2</sub>, O (DipPCl)<sub>2</sub>, α Dip<sub>4</sub>P<sub>4</sub>, β Dip<sub>3</sub>P<sub>3</sub>, X unidentified side products.

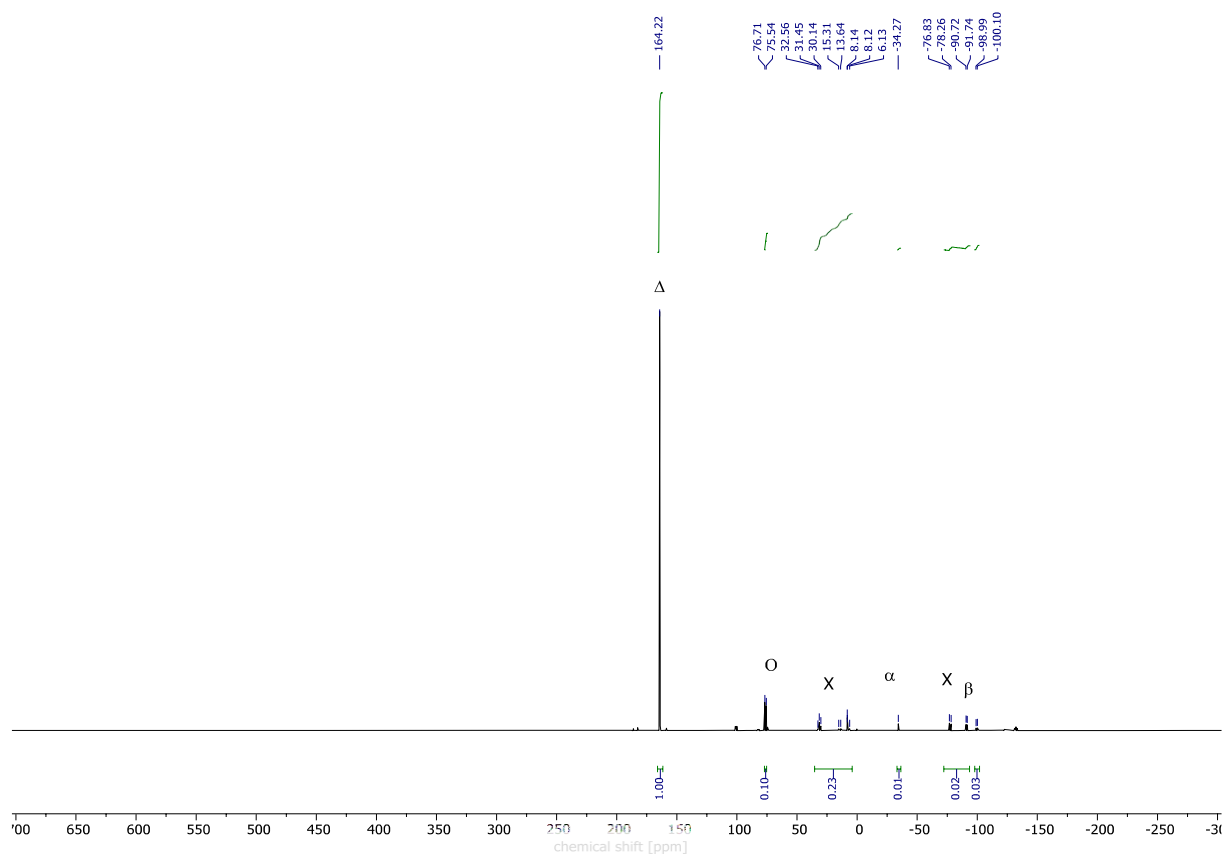

## 3.5 Catalysis with $\text{PnBu}_3$

### 3.5.1 $\text{DipPBr}_2 + \text{PnBu}_3$ (10 mol%)

$\text{DipPBr}_2$  (176 mg, 0.5 mmol) and zinc (65.0 mg, 1 mmol) were dissolved in THF (2.5 mL).  $\text{PnBu}_3$  (0.5 mL, 0.1 M in THF) was slowly added to the stirring solution at room temperature. The mixture was allowed to stir under the exclusion of light for 3 h. Afterwards the volatiles were evaporated. The  $^{31}\text{P}$  NMR spectrum was measured immediately.

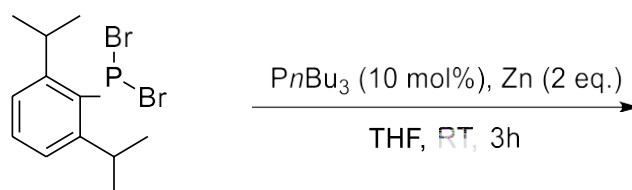

**Figure S20:**  $^{31}\text{P}$  NMR spectrum of the reaction of  $\text{DipPBr}_2$  with  $\text{PnBu}_3$ .  $\Delta$   $\text{DipPBr}_2$ , O  $(\text{DipPBr})_2$ , a  $\text{Dip}_3\text{P}_3$ , X unidentified side products.

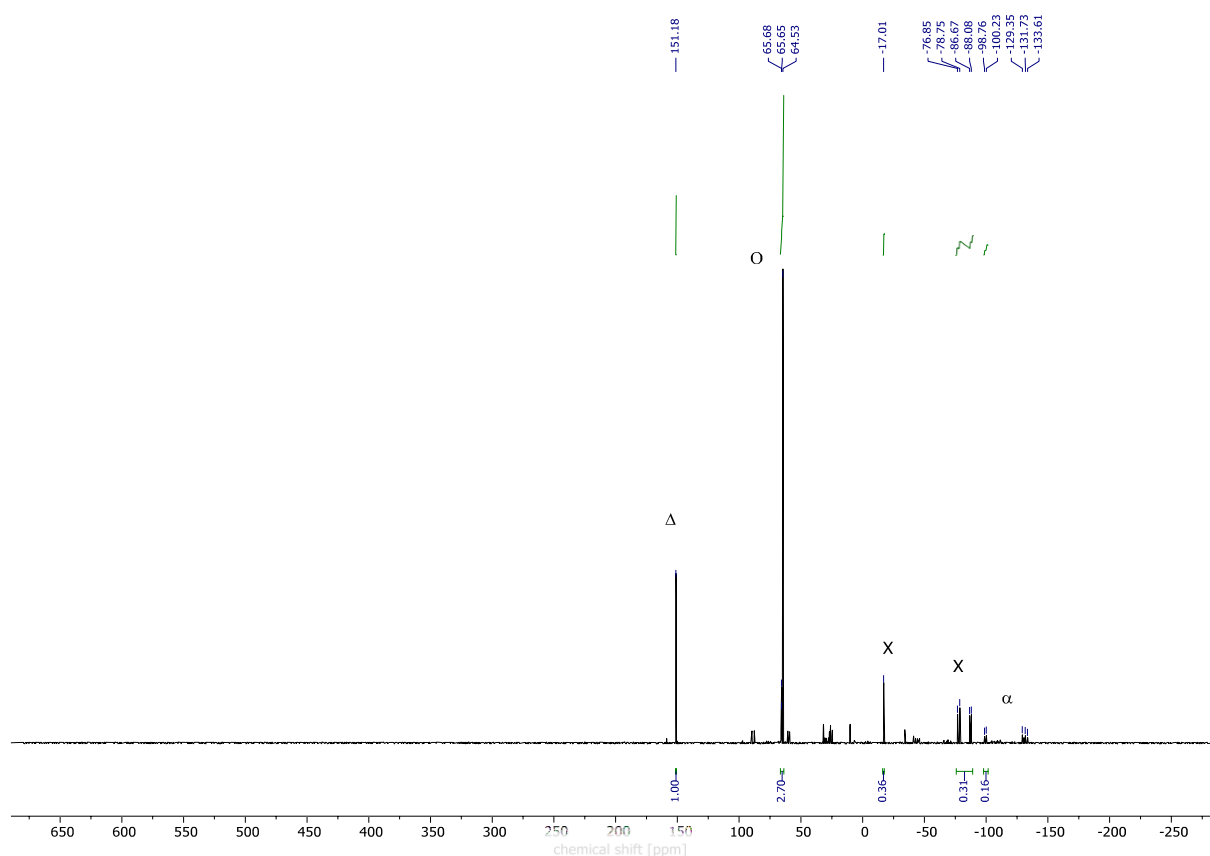

### 3.5.2 $\text{TipPBr}_2 + \text{PnBu}_3$ (10 mol%)

$\text{TipPBr}_2$  (197 mg, 0.5 mmol) and zinc (65.0 mg, 1 mmol) were dissolved in THF (2.5 mL).  $\text{PnBu}_3$  (0.5 mL, 0.1 M in THF) was slowly added to the stirring solution at room

temperature. The mixture was allowed to stir under the exclusion of light for 3 h. Afterwards the volatiles were evaporated. The  $^{31}\text{P}$  NMR spectrum was measured immediately.

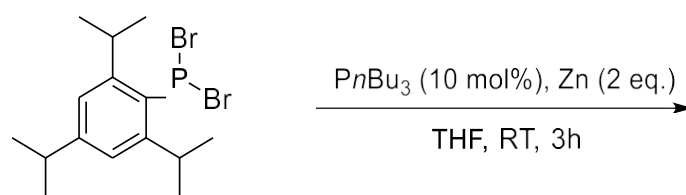

**Figure S21:**  $^{31}\text{P}$  NMR spectrum of the reaction of  $\text{TipPBr}_2$  with  $\text{PnBu}_3$ .  $\Delta$   $\text{TipPBr}_2$ , O  $(\text{TipPBr})_2$ , X unidentified side products.

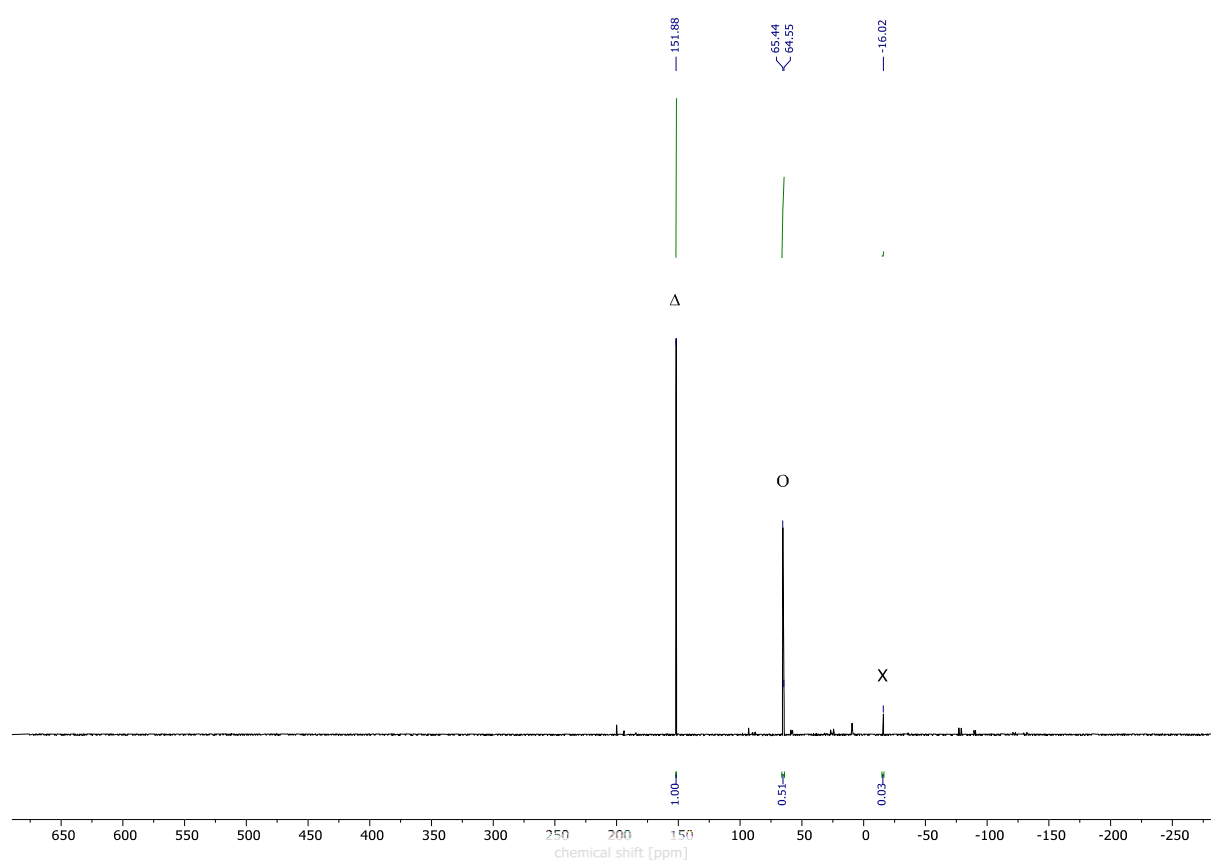

### 3.5.3 $\text{TipPCl}_2$ + $\text{PnBu}_3$ (10 mol%)

$\text{TipPBr}_2$  (197 mg, 0.5 mmol) and zinc (65.0 mg, 1 mmol) were dissolved in THF (2.5 mL).  $\text{PnBu}_3$  (0.5 ml, 0.1 M in THF) was slowly added to the stirring solution at room temperature. The mixture was allowed to stir under the exclusion of light for 3 hrs.

Afterwards the volatiles were evaporated. The  $^{31}\text{P}$  NMR spectrum was measured immediately.

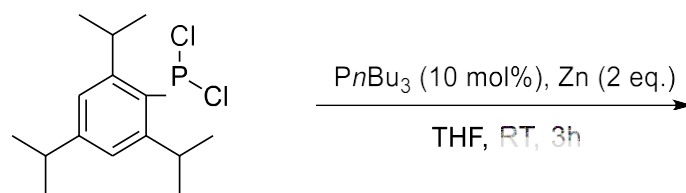

**Figure S22:**  $^{31}\text{P}$  NMR spectrum of the reaction of  $\text{TipPCl}_2$  with  $\text{PnBu}_3$ .  $\Delta$   $\text{TipPCl}_2$ ,  $\beta$   $(\text{TipPCl})_2$ ,  $\text{O}$   $\text{Tip}_4\text{P}_4$ ,  $\alpha$   $\text{Tip}_3\text{P}_3$ , X unidentified side products.

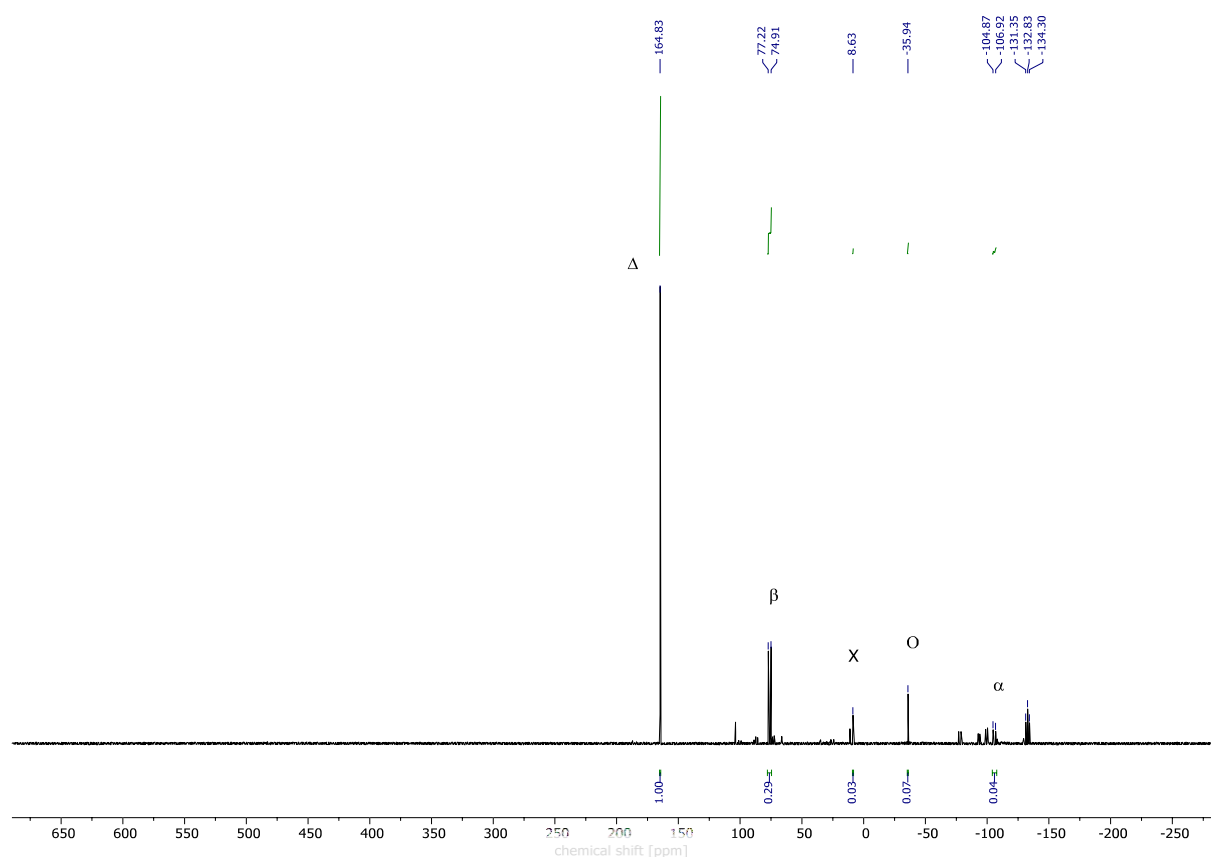

### 3.5.4 $\text{DipPCl}_2$ + $\text{PnBu}_3$ (10 mol%)

$\text{DipPCl}_2$  (85 mg, 0.323 mmol) and zinc (65.0 mg, 1 mmol) were dissolved in THF (2.5 mL).  $\text{PnBu}_3$  (0.32 mL, 0.1 M in THF) was slowly added to the stirring solution at room temperature. The mixture was allowed to stir under the exclusion of light for 3 h. Afterwards the volatiles were evaporated. The  $^{31}\text{P}$  NMR spectrum was measured immediately.

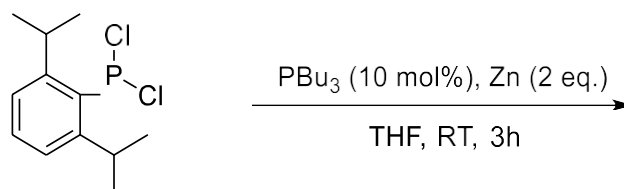

**Figure S23:**  $^{31}\text{P}$  NMR spectrum of the reaction of  $\text{DipPCl}_2$  with  $\text{PnBu}_3$ .  $\Delta$   $\text{DipPCl}_2$ , O  $(\text{DipPCl})_2$ , a  $\text{Dip}_2\text{P}_2$ , X unidentified side products.

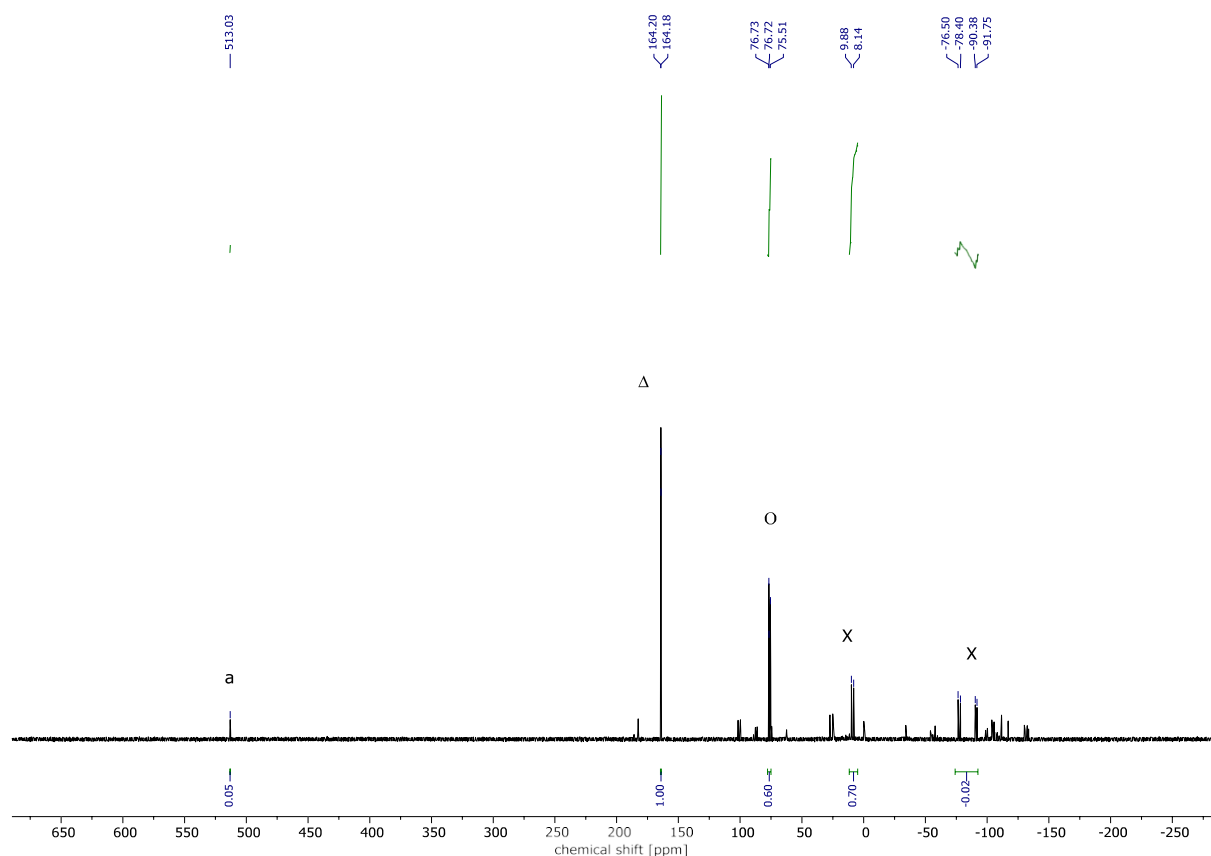

### 3.5.5 $\text{PhPCl}_2 + \text{P}^n\text{Bu}_3$ (10 mol%)

$\text{PhPCl}_2$  (94.2 mg, 0.53 mmol) and zinc (65.0 mg, 1 mmol) were dissolved in THF (2.5 mL).  $\text{P}^n\text{Bu}_3$  (0.53 ml, 0.1 M in THF) was slowly added to the stirring solution at room temperature. The mixture was allowed to stir under the exclusion of light for 3 hrs. Afterwards the volatiles were evaporated. The  $^{31}\text{P}$  NMR spectrum was measured immediately.

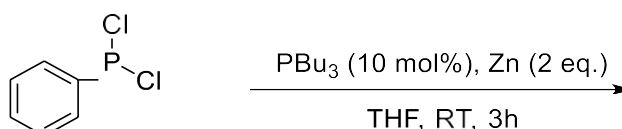

**Figure S24:**  $^{31}\text{P}$  NMR spectrum of the reaction of  $\text{PhPCl}_2$  with  $\text{PnBu}_3$ .  $\Delta$   $\text{PhPCl}_2$ , O  $(\text{PhPCl})_2$ , a  $\text{Ph}_5\text{P}_5$ , X unidentified side products.

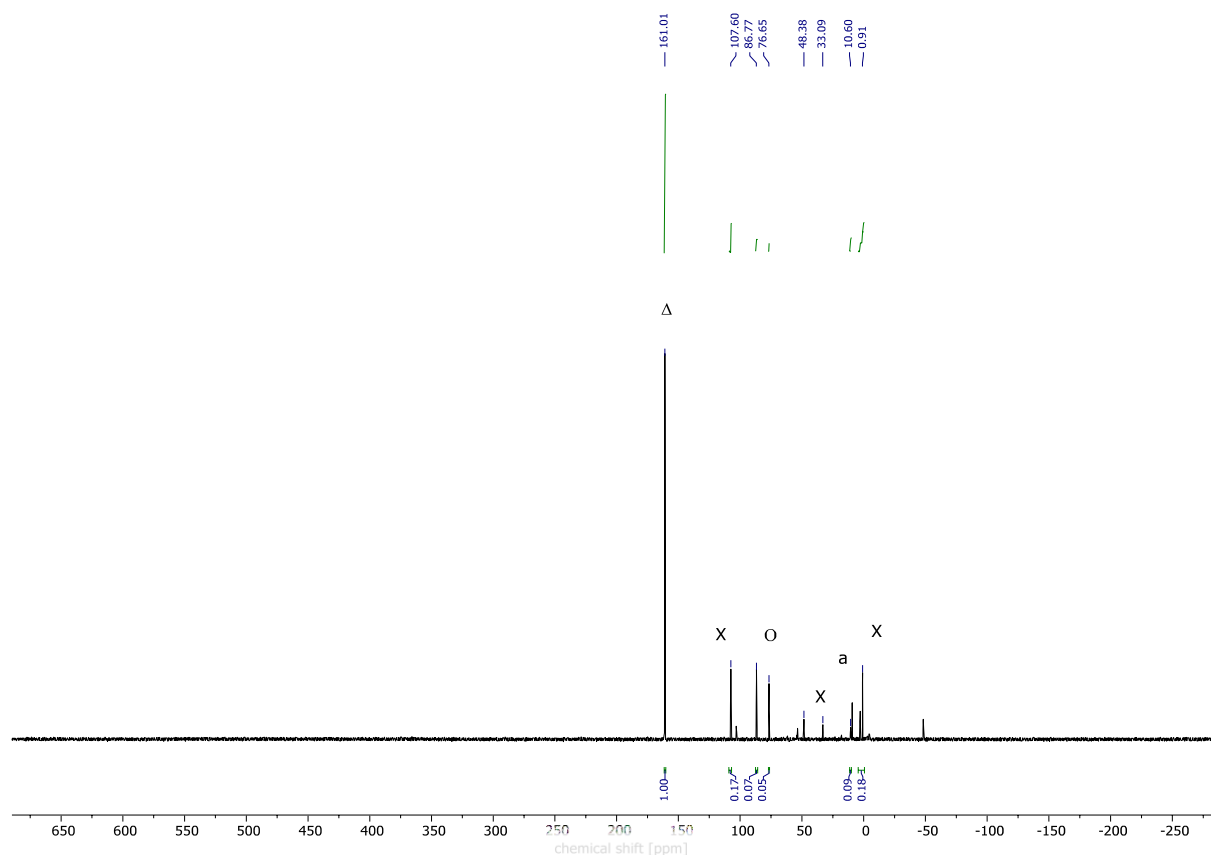

### 3.5.6 $\text{Mes}_2\text{PX}$ (X = Cl, Br) + $\text{PnBu}_3$ (10 mol%)

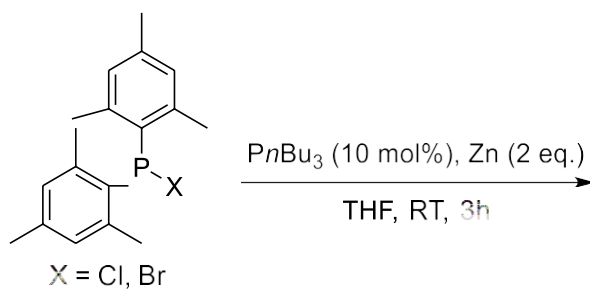

To  $\text{Mes}_2\text{PX}$  (X = Cl, Br) (119 mg, 0.5 mmol) and zinc (65.0 mg, 1 mmol) THF (2 mL) was added.  $\text{PnBu}_3$  (0.5 mL, 0.1 M in THF) was slowly added to the stirring solution at room temperature. The mixture was allowed to stir under the exclusion of light for 3 h. Afterwards the volatiles were evaporated. The  $^{31}\text{P}$  NMR spectrum was measured immediately.

**Figure S25:**  $^{31}\text{P}$  NMR spectrum of the reaction of  $\text{Mes}_2\text{PX}$  with  $\text{PnBu}_3$ .  $\Delta$   $\text{Mes}_2\text{PX}$ ,  $\text{O}$   $(\text{Mes}_2\text{P})_2$ ,  $\text{X}$  unidentified side products.

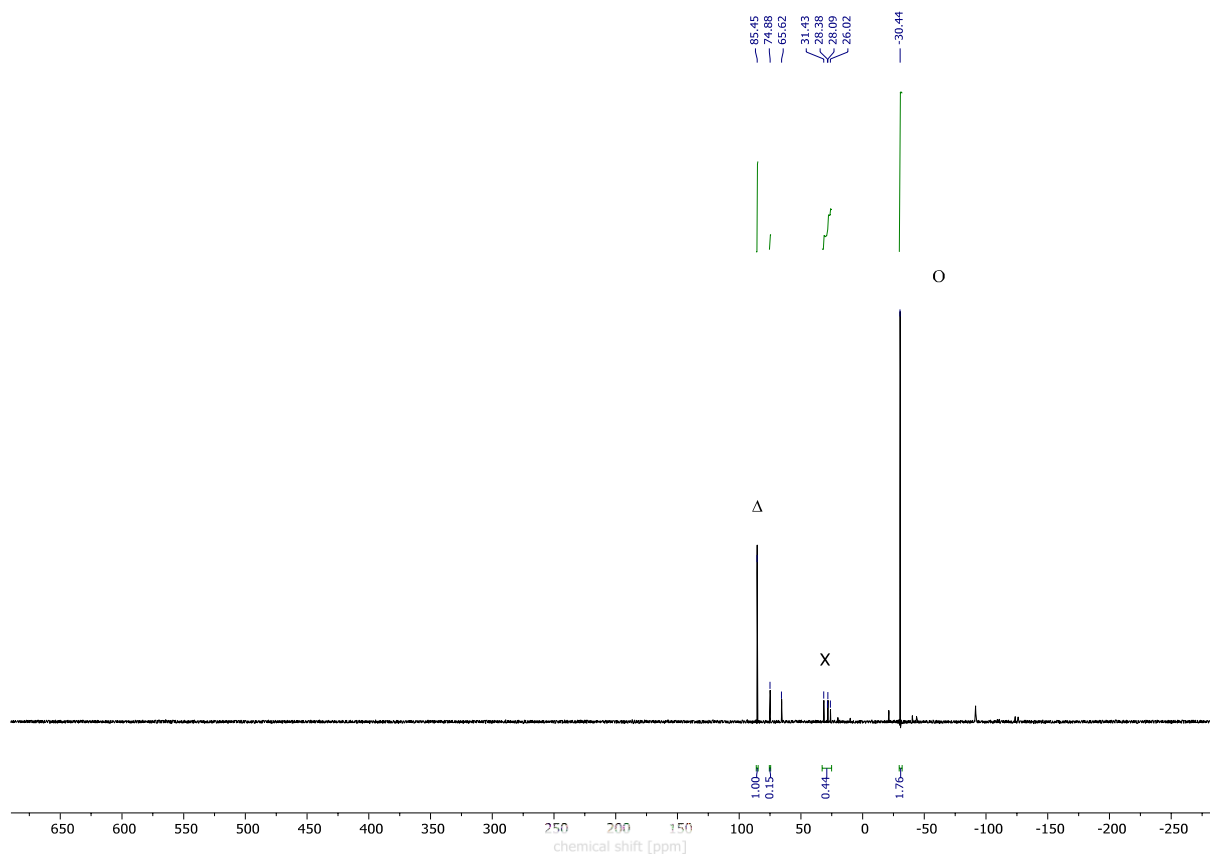

### 3.6 Control experiments

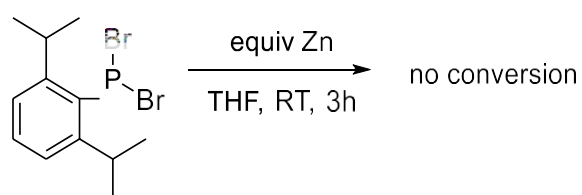

**Figure S26:**  $^{31}\text{P}$ -NMR spectra of reaction of  $\text{DipPBr}_2$  and zinc. No conversion occurs without the addition of  $\text{PEt}_3$ .

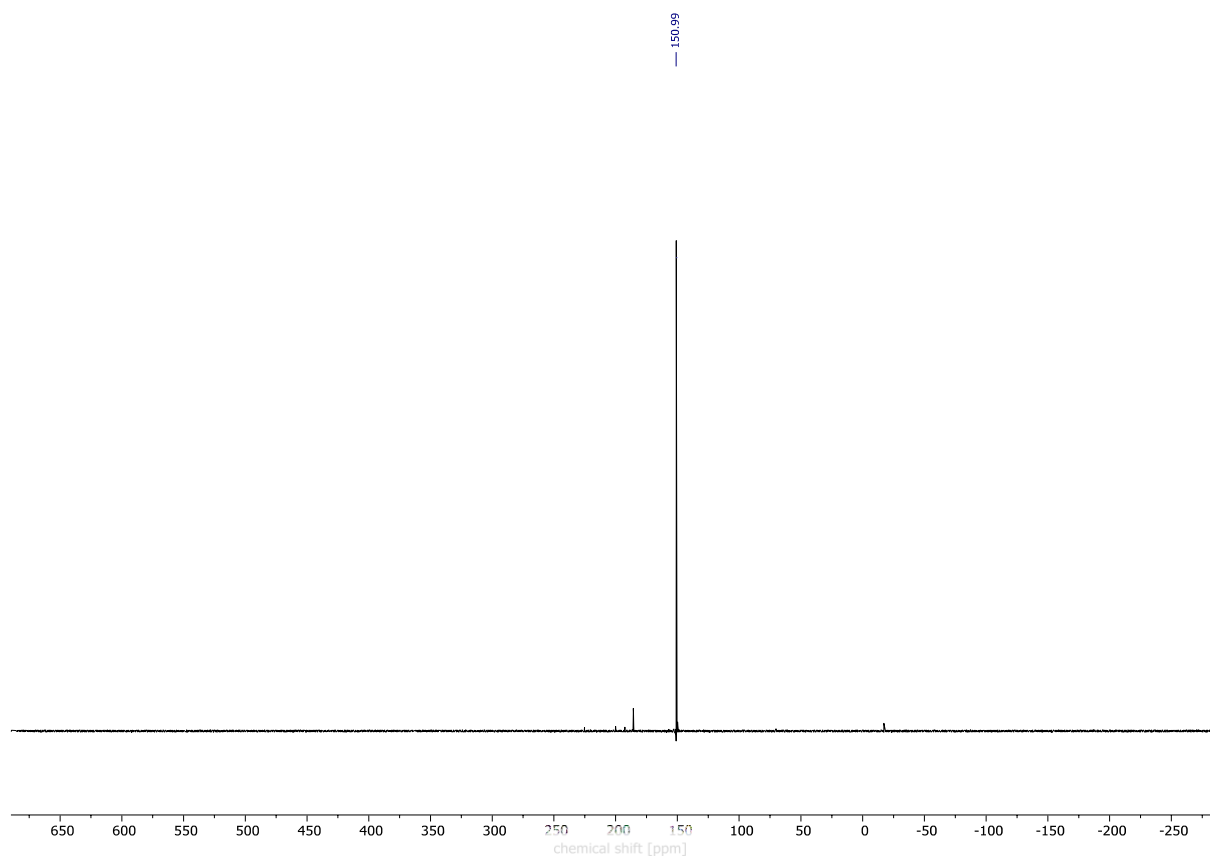

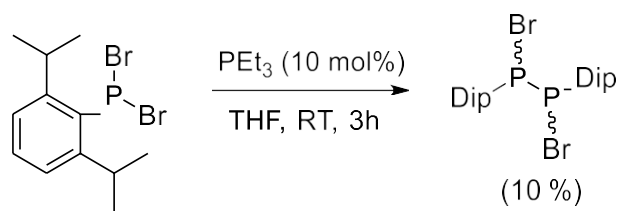

**Figure S27:**  $^{31}\text{P}$ -NMR spectra of reaction of  $\text{DipPBr}_2$  and  $\text{PEt}_3$  (10 mol%). Ca. 10% of  $(\text{DipPBr})_2$  are formed.

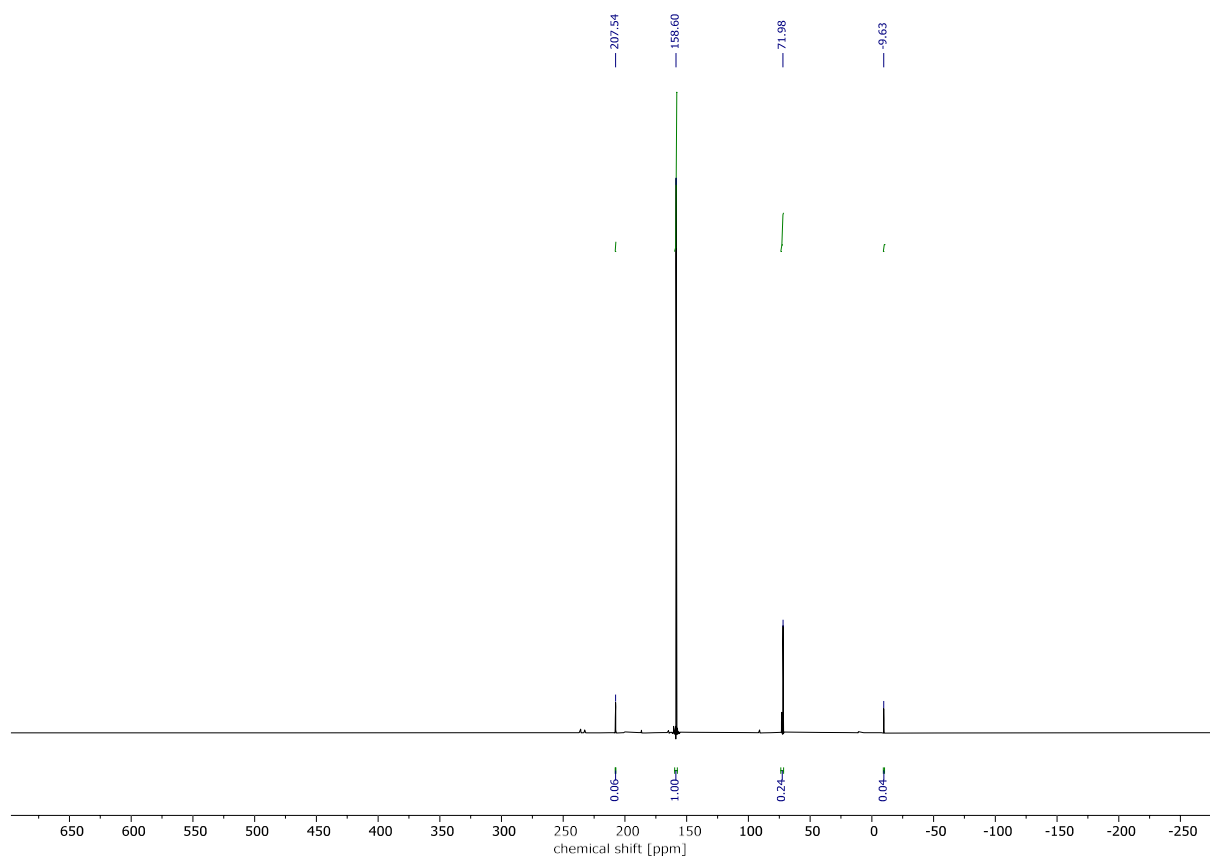

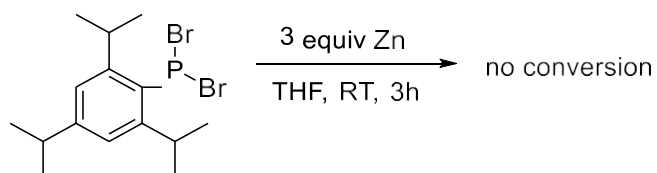

**Figure S28:**  $^{31}\text{P}$ -NMR spectrum of the reaction of  $\text{TipPBr}_2$  and zinc. No conversion occurs without the addition of  $\text{PEt}_3$ .

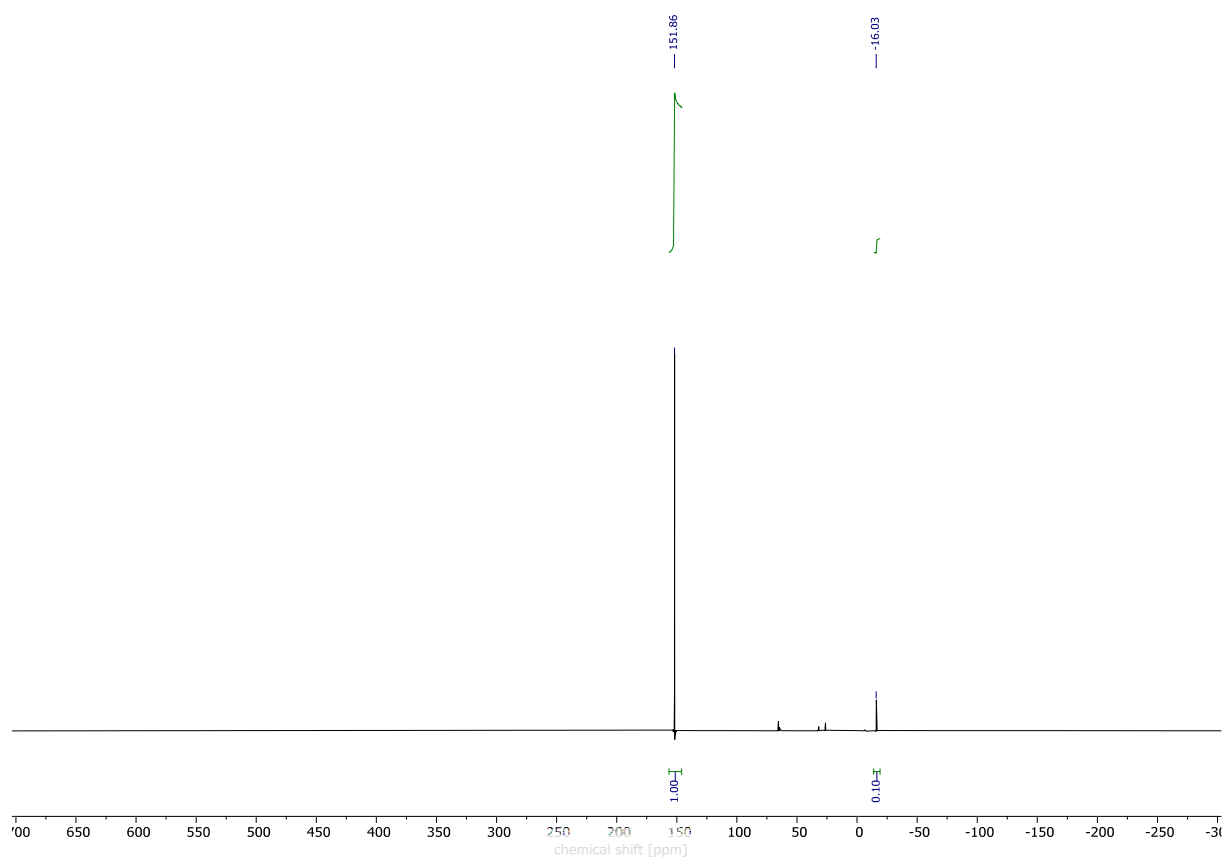

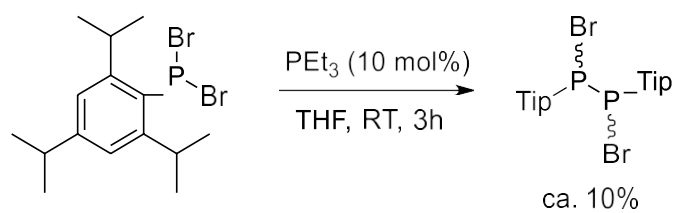

**Figure S29:**  $^{31}\text{P}$ -NMR spectra of reaction of  $\text{TipPBr}_2$  and  $\text{PEt}_3$  (10 mol%). Small amounts of  $(\text{TipPBr}_2)_2$  are formed.

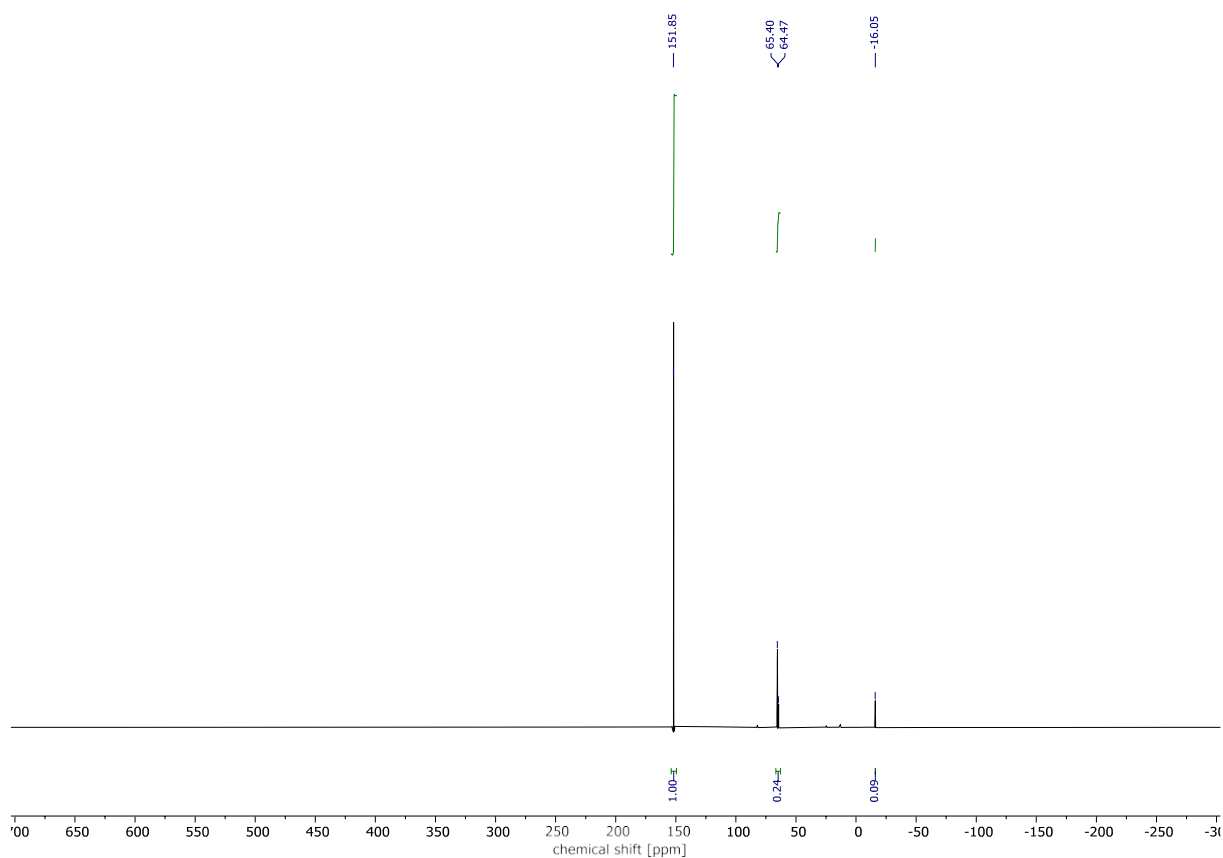

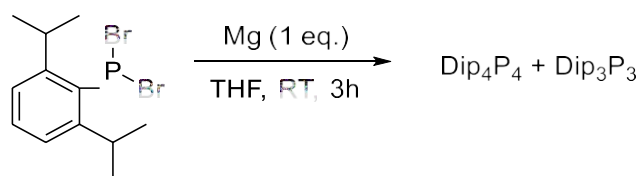

**Figure S30:**  $^{31}\text{P}$ -NMR spectrum of the reaction of  $\text{DipPBr}_2$  and Mg (1 eq.) after 3 hrs.

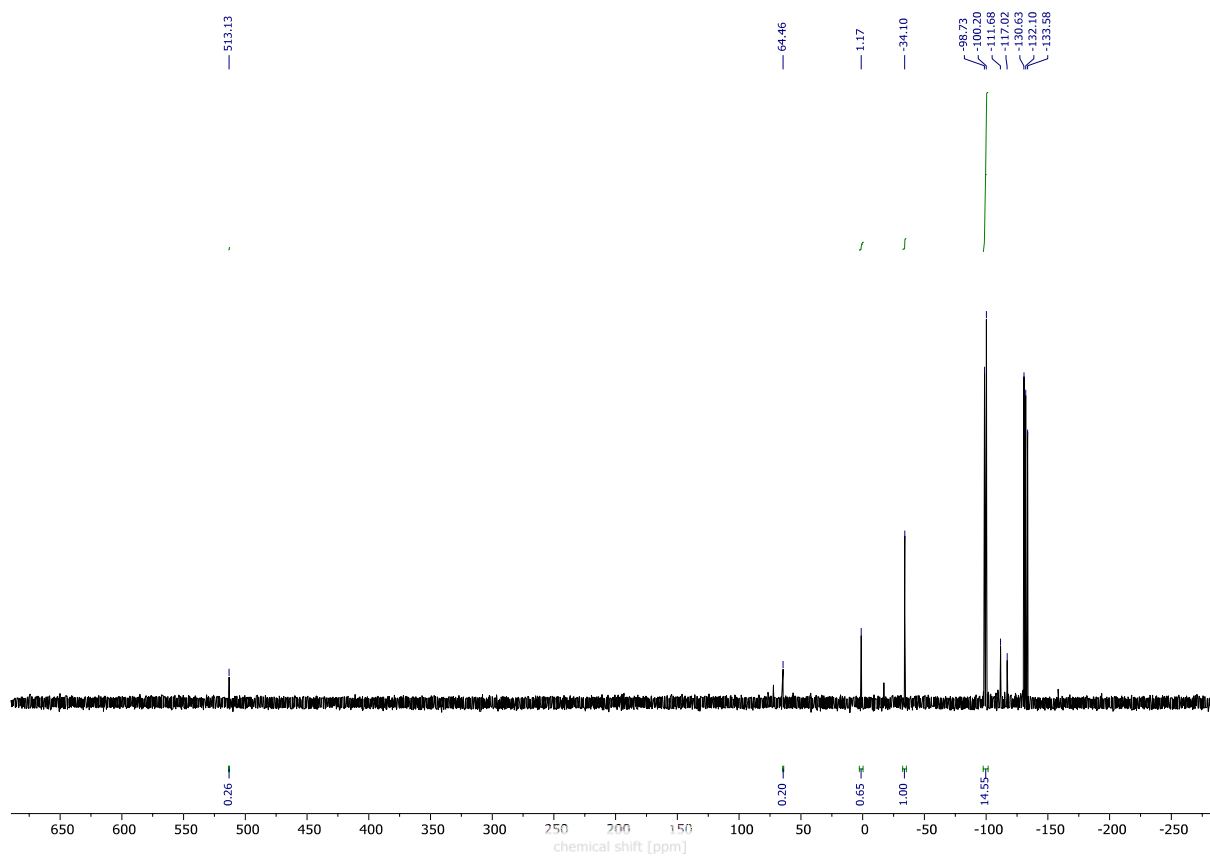

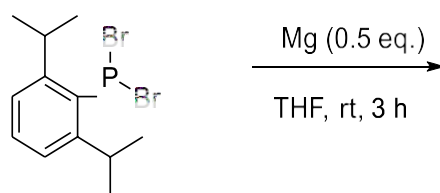

**Figure S31:**  $^{31}\text{P}$ -NMR spectrum of the reaction of DipPBr<sub>2</sub> and Mg (0.5 eq.) after 3 h.

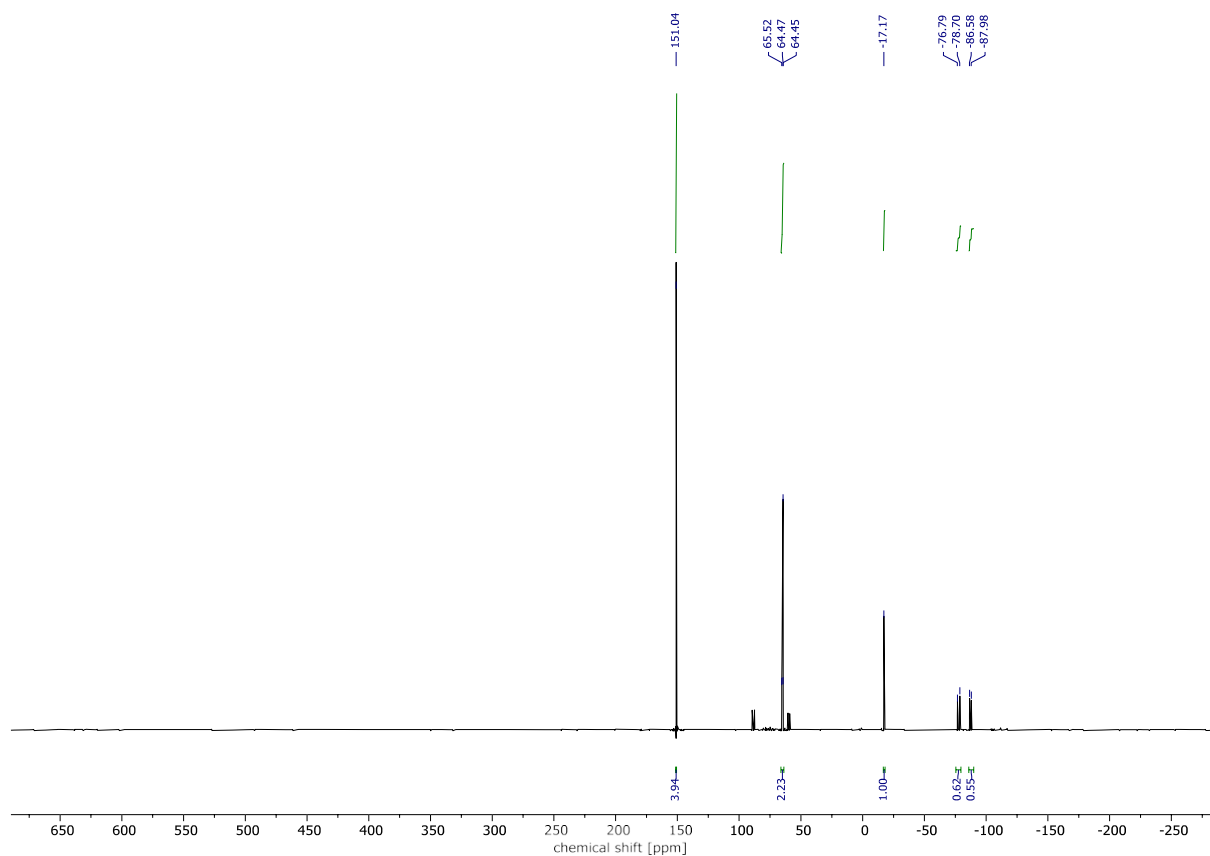

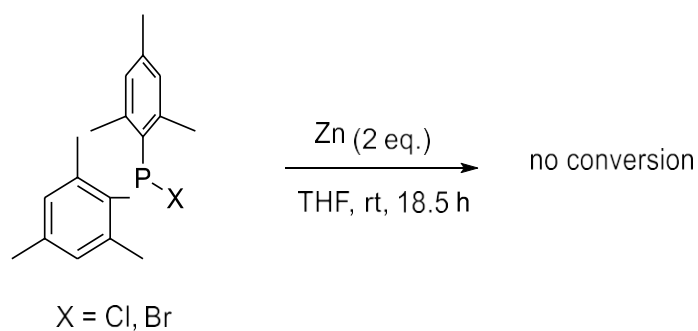

**Figure S32:**  $^{31}\text{P}$ -NMR spectrum of the reaction of  $\text{Mes}_2\text{PX}$  and Zn (2 eq.) after 18.5 h.

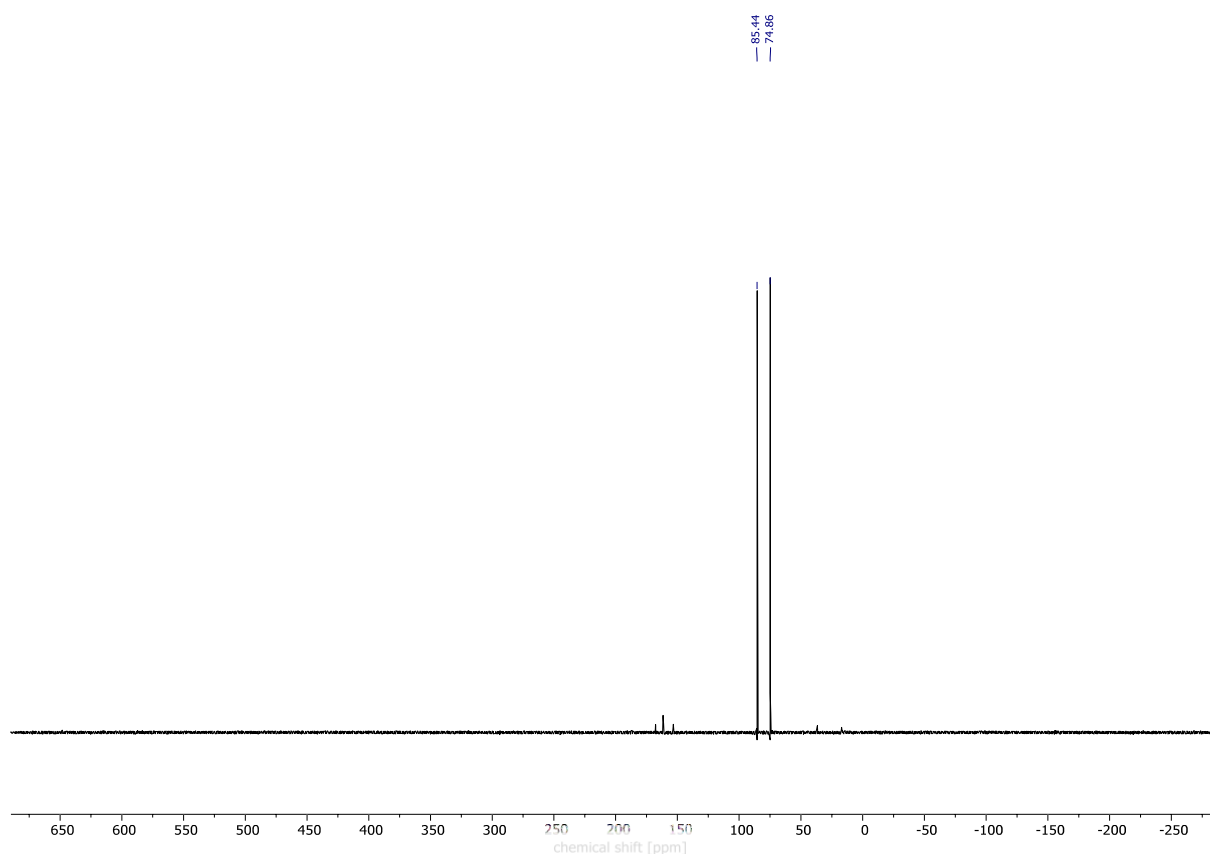

### 3.7 Conclusion

**Table S3.** Main products of the catalytic reactions with the respective trialkylphosphanes or trialkyl phosphane precursors.

|                   | $\text{PEt}_3$ (10 mol%)                  | $\text{Br}_2\text{PEt}_3$ (10 mol%)  | $\text{PMe}_3$ (10 mol%)             | $\text{Cl}_2\text{PMe}_3$ (10 mol%)  |
|-------------------|-------------------------------------------|--------------------------------------|--------------------------------------|--------------------------------------|
| $\text{DipPBr}_2$ | $\text{P}_2\text{Dip}_2$                  | $(\text{DipPBr})_2$                  | $(\text{DipPBr})_2$                  | $\text{DipPBr}_2, (\text{DipPBr})_2$ |
| $\text{TipPBr}_2$ | $(\text{TipPBr})_2$                       | $\text{TipPBr}_2, (\text{TipPBr})_2$ | $\text{TipPBr}_2, (\text{TipPBr})_2$ | $(\text{TipPBr})_2$                  |
| $\text{DipPCl}_2$ | $\text{DipPCl}_2, (\text{DipPCl})_2$      | $\text{DipPCl}_2$                    | $\text{DipPCl}_2$                    | $\text{DipPCl}_2$                    |
| $\text{TipPCl}_2$ | $\text{TipPCl}_2, \text{Tip}_4\text{P}_4$ | $\text{TipPCl}_2$                    | $\text{TipPCl}_2$                    | $\text{TipPCl}_2$                    |



## 4 Syntheses of compounds

### 4.1 Synthesis of (TipPBr)<sub>2</sub> (**1**)

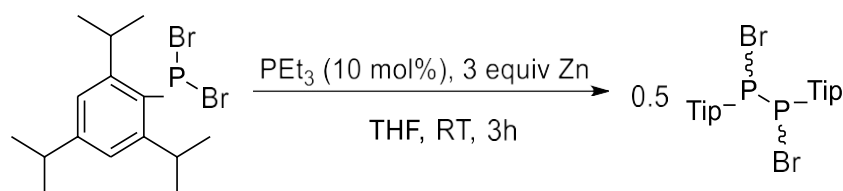

A  $\text{PEt}_3$  solution (0.5 mL, 0.1 M in THF, 0.05 mmol) was added dropwise to a stirred solution of  $\text{TipPBr}_2$  (197 mg, 0.5 mmol) and zinc (100 mg, 1.575 mmol) in THF (2 mL) at ambient temperature. The mixture was stirred under the exclusion of light for 3 h. After removing the solvent *in vacuo*, extraction with toluene (10 mL) yielded a yellow solution. The filtrate was concentrated to incipient crystallization and was stored at  $-78^\circ\text{C}$  for 48 h, yielding  $(\text{TipPBr})_2$  as yellow crystalline solid (53 mg, 0.084 mmol, 34 %).

X-Ray quality crystals of *R,S*-**1** and *S,S*-**1** were grown from saturated *n*-hexane solutions at  $5^\circ\text{C}$ .

**CHN** calc. (found) in %: C 57.34 (57.47), H 7.38 (7.60). **<sup>31</sup>P NMR** (122 MHz,  $\text{C}_6\text{D}_6$ )  $\delta$  = 65.38, 64.43. **IR** (ATR, 32 scans,  $\text{cm}^{-1}$ ):  $\nu$ = 2954.9 (s), 2925.4 (m), 2865.5 (m), 1597.8 (s), 1544.4 (w), 1459.8 (m), 1418.7 (m), 1380.3 (m), 1361.2 (m), 131.8 (w), 1263.3 (w), 1191.3 (w), 1131.1 (w), 1103.2 (m), 1068.8 (w), 1051.2 (w), 1033.2 (w), 934.8 (m), 880.6 (s), 841.0 (w), 752.5 (w), 727.5 (w), 652.2 (m), 567.3 (m), 516.0 (w), 478.5 (m)  $\text{cm}^{-1}$ . **MS** (EI) expected 626.14360, observed 626.14351.

**Figure S33:**  $^1\text{H}$  NMR spectrum of  $(\text{TipPBr})_2$  in  $\text{C}_6\text{D}_6$  at r.t.

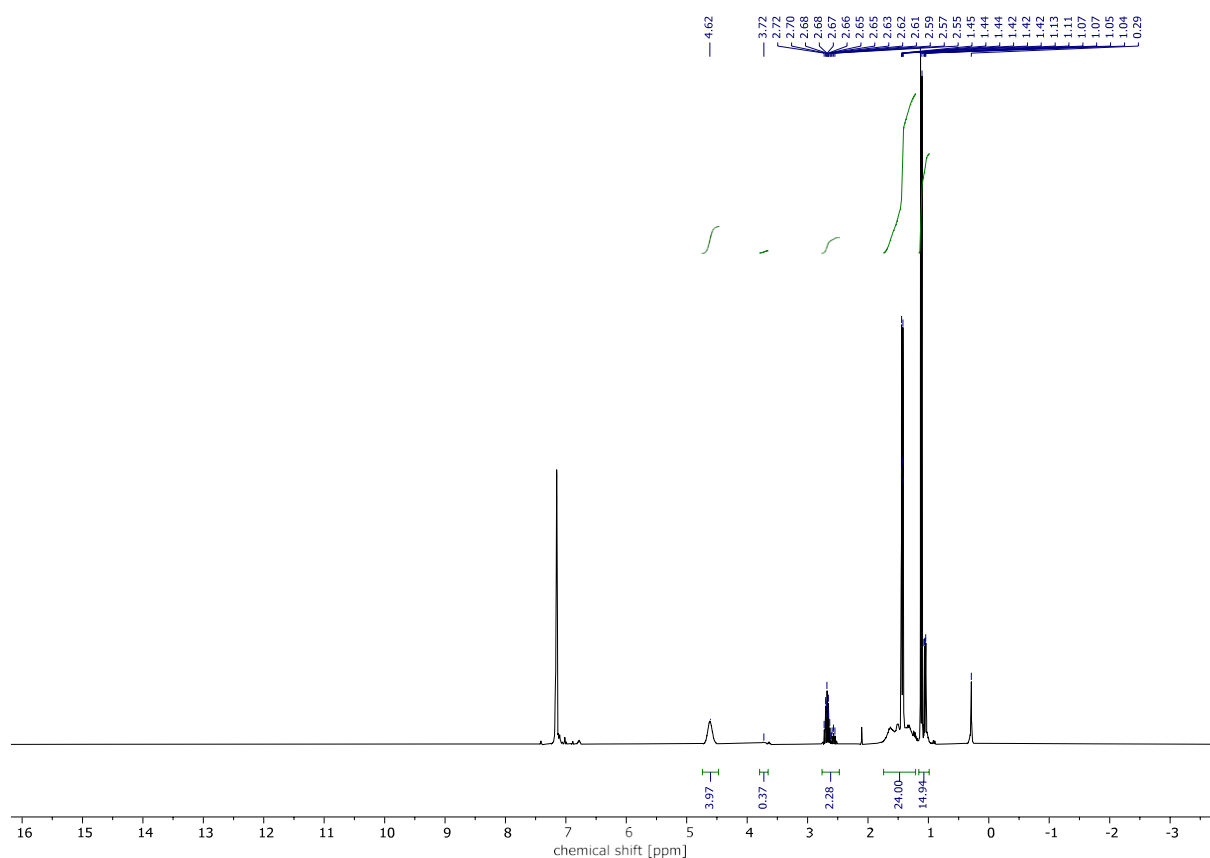

**Figure S34:**  $^{31}\text{P}\{^1\text{H}\}$  NMR spectrum of  $(\text{TipPBr})_2$  in  $\text{C}_6\text{D}_6$  at r.t.

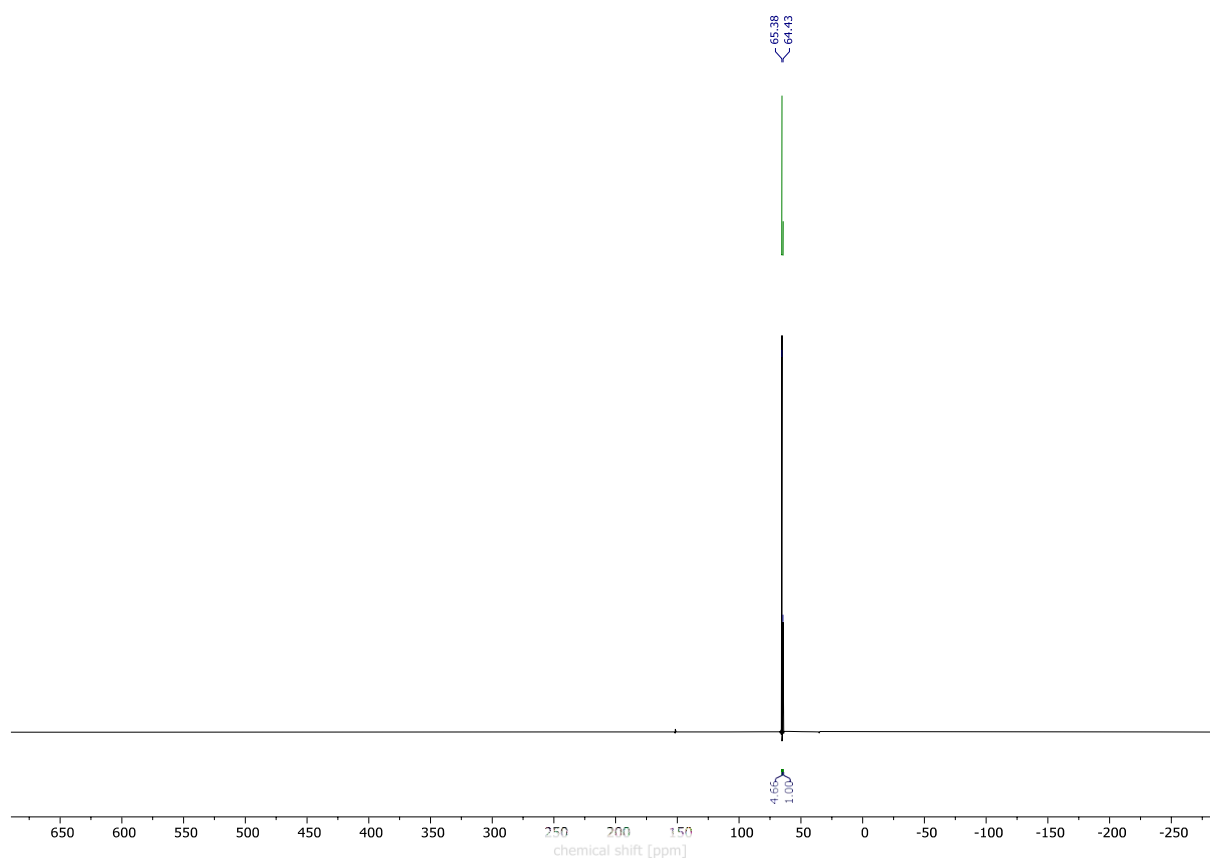

**Figure S35:** IR spectrum of crystalline (TipPBr)<sub>2</sub>.

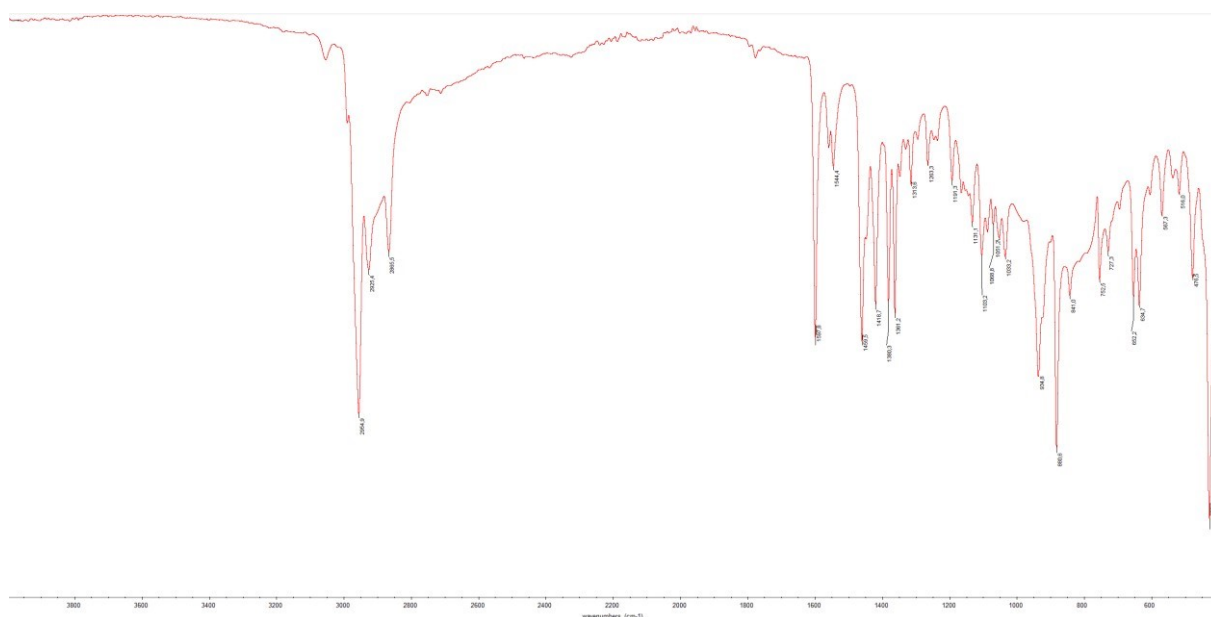

#### 4.1.1 Thermal stability of (TipPBr)<sub>2</sub>

(TipPBr)<sub>2</sub> (21 mg, 0.03 mmol) was dissolved in C<sub>6</sub>D<sub>6</sub> and monitored via <sup>31</sup>P-NMR in a Y-Jung NMR tube. The conversion was determined via <sup>31</sup>P NMR integrals.

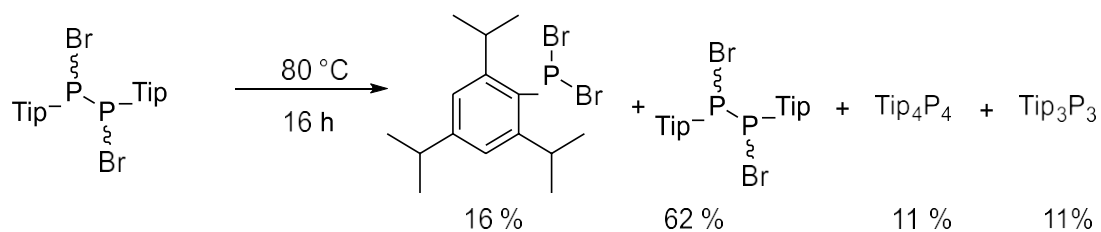

**Figure S36:**  $^{31}\text{P}\{^1\text{H}\}$  NMR spectrum of  $(\text{TipPBr})_2$  in  $\text{C}_6\text{D}_6$  at r.t. (bottom), after 80 °C for 16 h (middle), after 80 °C for 33 h (top).

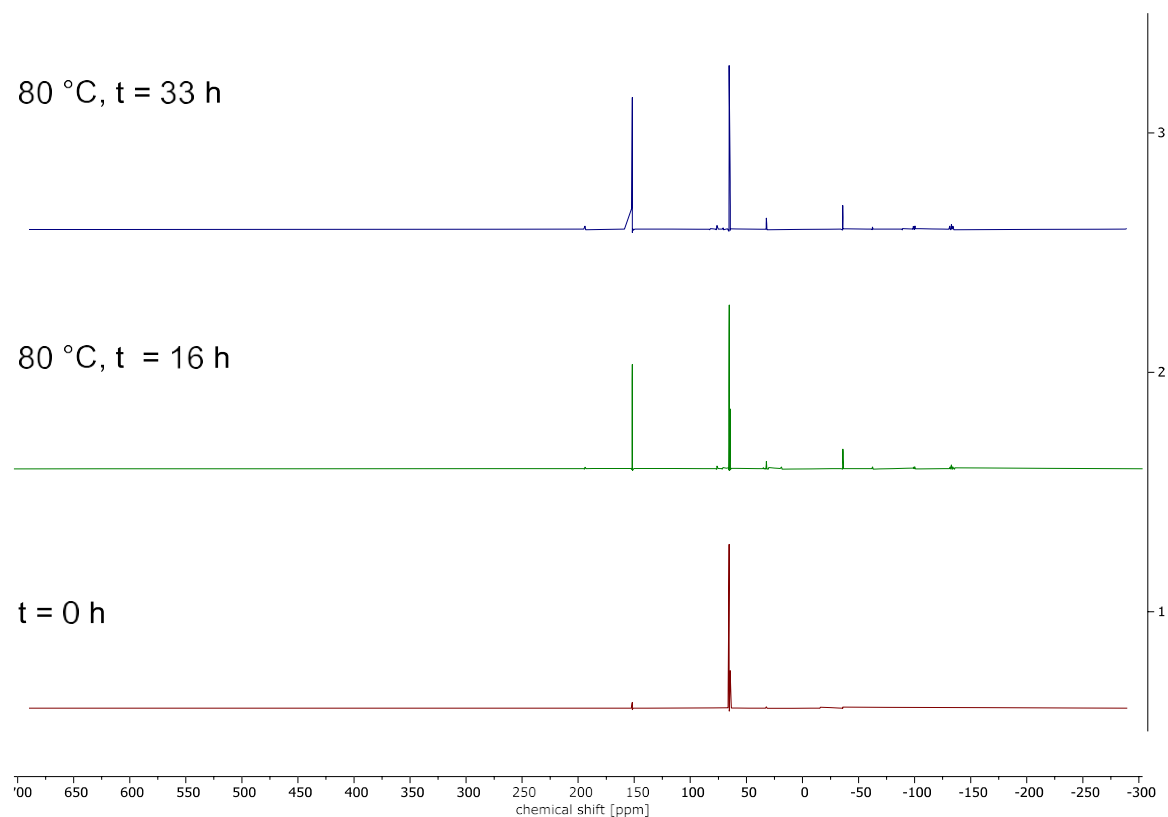

$\text{TipPBr}_2$  (10 mg, 0.016 mmol) and  $(\text{TipPBr})_2$  (6.3 mg, 0.016 mmol) were dissolved in  $\text{C}_6\text{D}_6$  and monitored via  $^{31}\text{P}$ -NMR in a Y-Jung NMR tube.

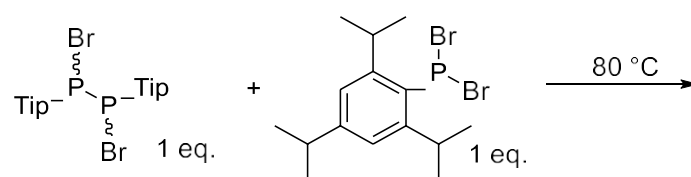

**Figure S37:**  $^{31}\text{P}\{^1\text{H}\}$  NMR spectrum of  $(\text{TipPBr})_2$  and  $\text{TipPBr}_2$  in  $\text{C}_6\text{D}_6$  at r.t. (bottom), after 80 °C for 24.5 h (top).

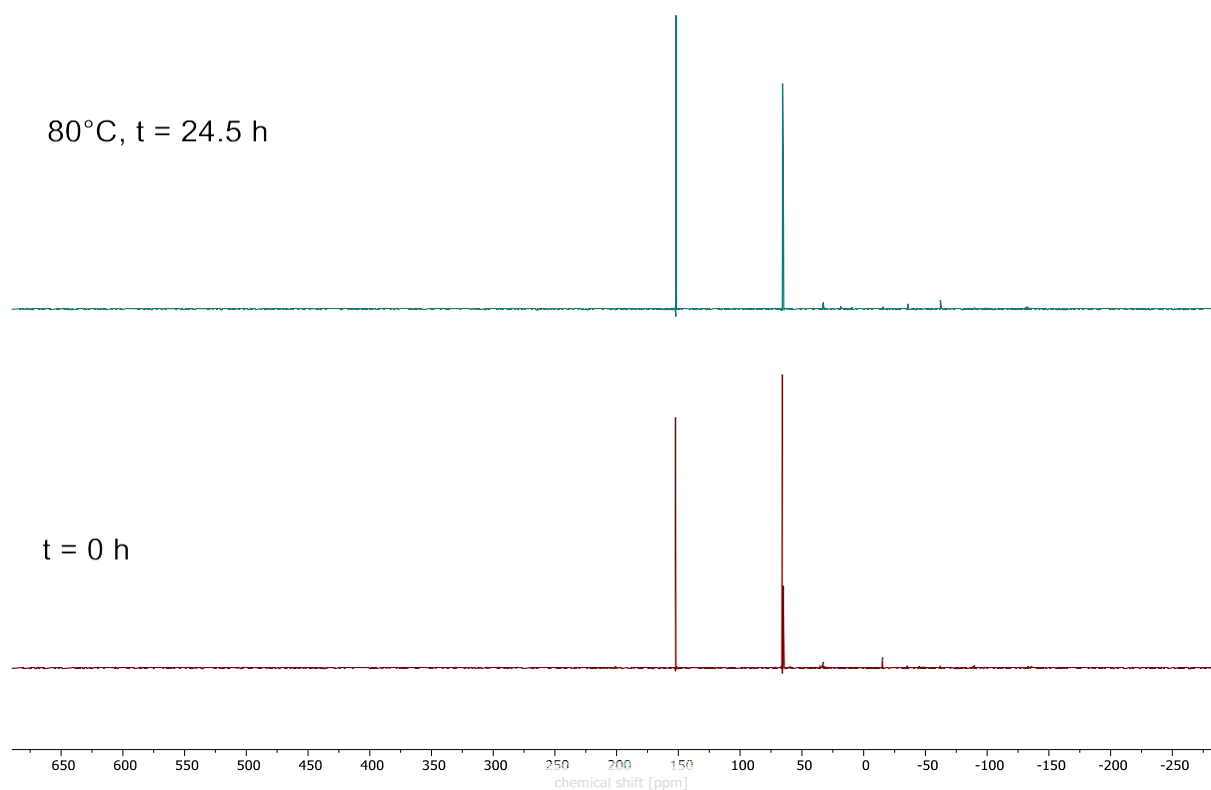

## 4.2 Synthesis of (PDip)(2)

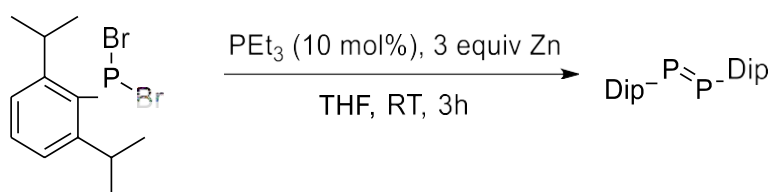

To  $\text{DipPBr}_2$  (0.672 g, 1.9 mmol) and zinc (0.189 g, 3 eq.) THF (10 mL) was added.  $\text{PEt}_3$  (1.9 mL, 0.1 M in THF, 0.19 mmol) was added dropwise to the stirring mixture. The solution turned bright yellow immediately and was stirred under the exclusion of light for 3 h. The solvent was removed *in vacuo* and the resulting yellow/green residue was thoroughly dried (3 freeze-pump-thaw cycles). The residue was then extracted with *n*-hexane (3 x 10 mL) and filtered over an G4 frit. The filtrate was then concentrated to incipient crystallization (under the exclusion of light) and was stored at  $-30\text{ }^\circ\text{C}$  for 24 h.  $(\text{PDip})_2$  was afforded as yellow crystalline solid (0.135 g, 0.35 mmol, 37 %).

X-Ray quality crystal were grown from saturated a *n*-hexane solution at  $5\text{ }^\circ\text{C}$ .

**CHN** calc. (found) in %: C 74.97 (74.67), H 8.91 (9.03).  **$^1\text{H}$  NMR** ( $\text{C}_6\text{D}_6$ , 300 MHz):  $\delta$  = 7.35-7.22 (m, 2H,  $p\text{-C}_{\text{Ar}}\text{H}$ ), 7.14 (m, 4H,  $m\text{-C}_{\text{Ar}}\text{H}$ ), 3.45 – 3.30 (hept,  $^3J_{\text{HH}}$  = 6.7 Hz, 4H,  $\text{CH}(\text{CH}_3)_2$ ), 1.26 (d,  $^3J_{\text{HH}}$  = 6.7 Hz, 24H,  $\text{CH}(\text{CH}_3)_2$ ) ppm.  **$^{13}\text{C}\{^1\text{H}\}$  NMR** ( $\text{C}_6\text{D}_6$ , 75.5 MHz):  $\delta$  = 150.6, 141.1, 130.2, 123.7, 33.8, 23.5 ppm.  **$^{31}\text{P}\{^1\text{H}\}$  NMR** ( $\text{C}_6\text{D}_6$ , 121.5 MHz):  $\delta$  = 513.0 ppm. **IR** (ATR, 32 scans,  $\text{cm}^{-1}$ ):  $\nu$ = 3050.2 (w), 2952.5 (s), 2928.0 (m), 2861.3 (m), 1583.3 (w), 1569.7 (w), 1457.4 (s), 1380.0 (m), 1357.5 (m), 1340.2 (w), 1301.3 (w), 1233.6 (m), 1177.2 (w), 1158.4 (w), 1101.4 (w), 1051.2 (w), 1034.2 (m), 930.4 (m), 795.0 (s), 732.4 (s), 505.9 (w)  $\text{cm}^{-1}$ . **MS** (ESI-TOF): expected 385.2214, observed 385.2211.

**Figure S38:**  $^1\text{H}$  NMR spectrum of (PDip) $_2$  (**2**) in  $\text{C}_6\text{D}_6$  at r.t.

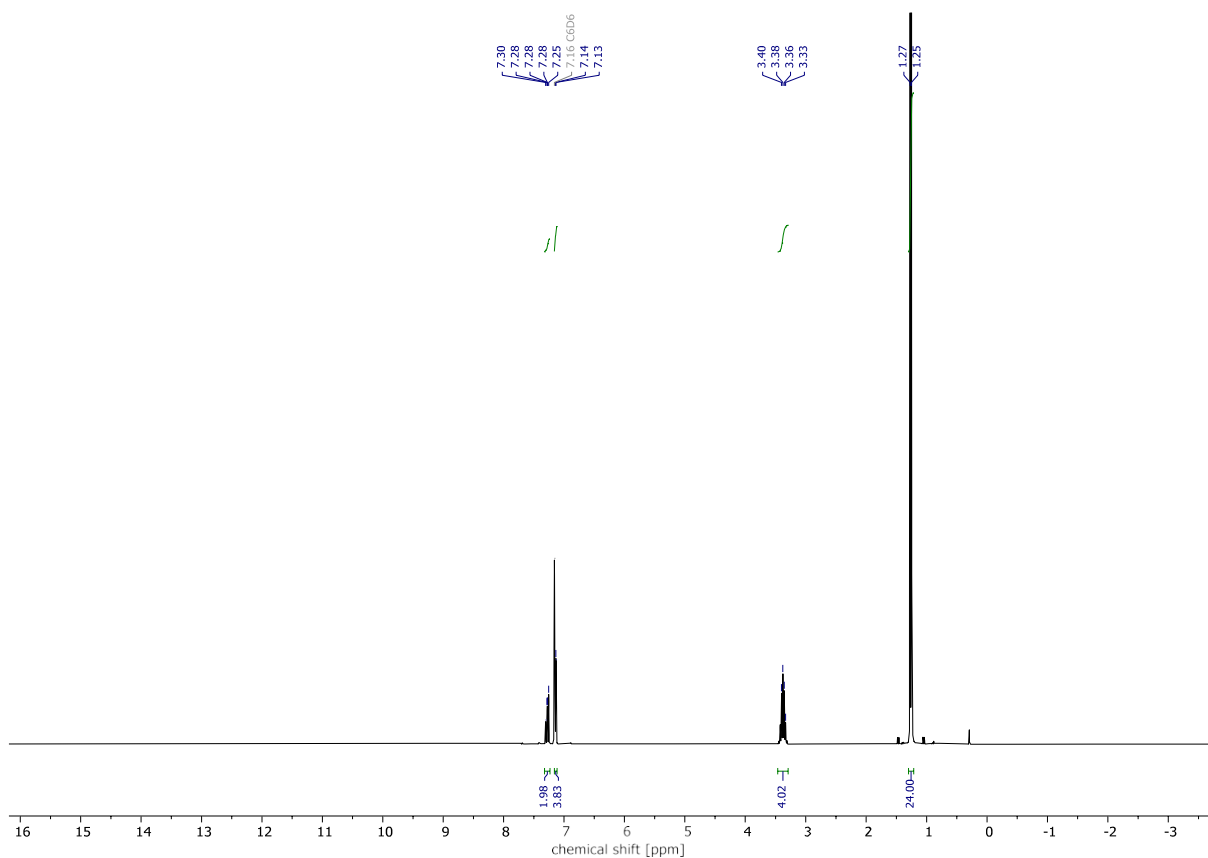

**Figure S39:**  $^{13}\text{C}$  NMR spectrum of (PDip) $_2$  (**2**) in  $\text{C}_6\text{D}_6$  at r.t.

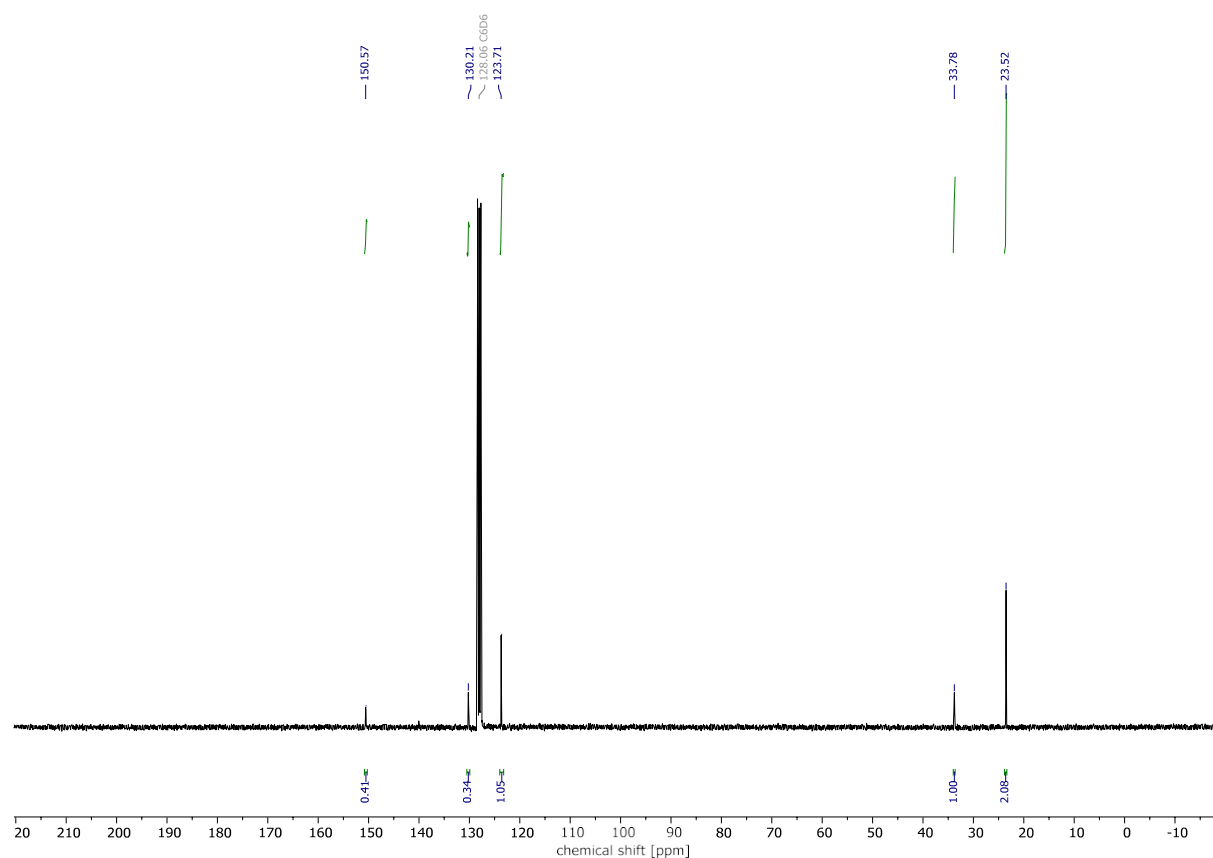

**Figure S40:**  $^{31}\text{P}\{^1\text{H}\}$  NMR spectrum of (PDip) $_2$  in  $\text{C}_6\text{D}_6$  at r.t.

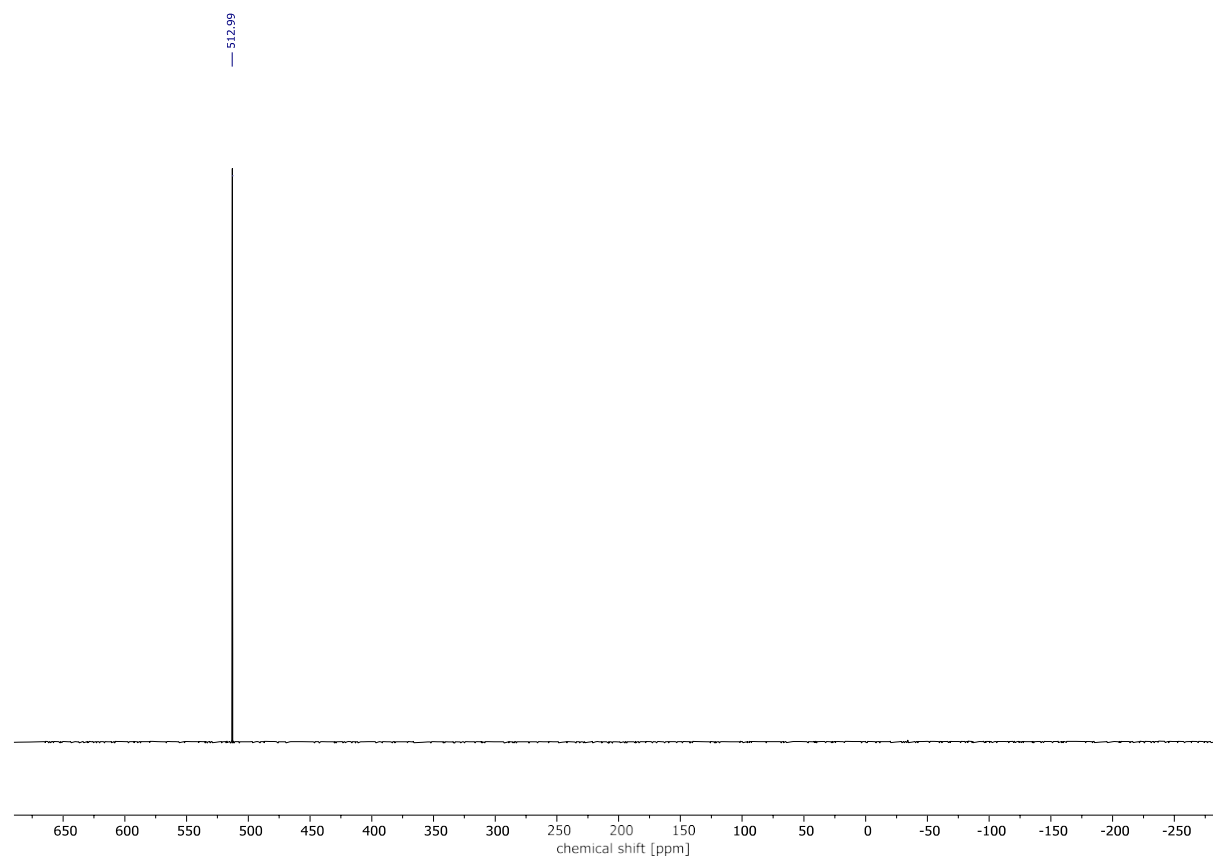

**Figure S41:** IR spectrum of crystalline (PDip)<sub>2</sub>.

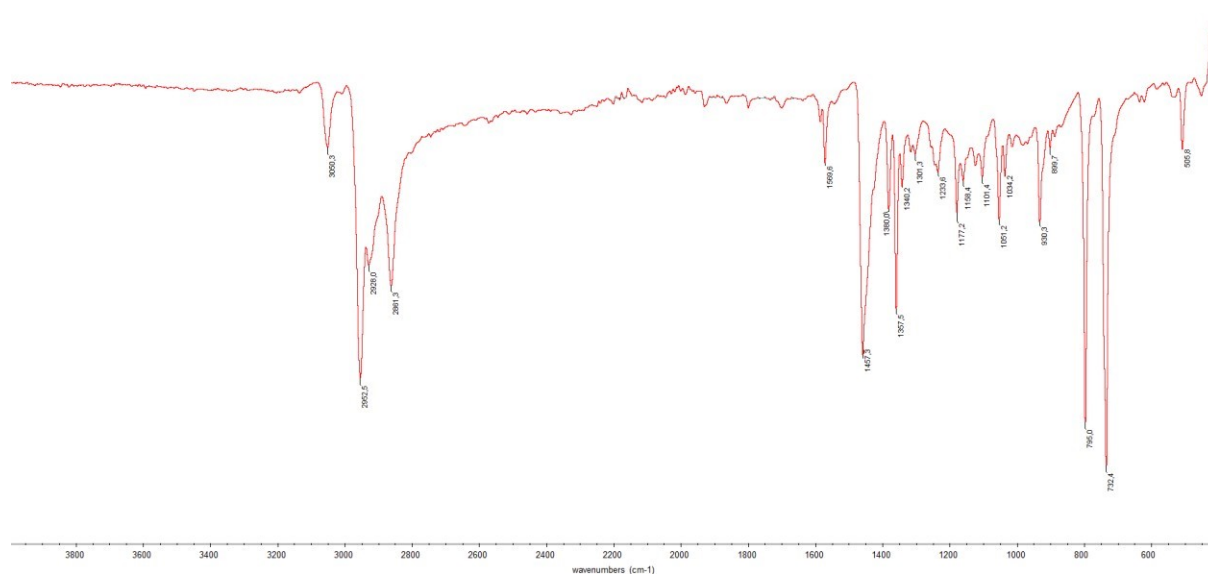

#### 4.2.1 Cyclic Voltammetry Studies of **2**

**Figure S42:** Cyclic voltammogram of (PDip)<sub>2</sub> (**2**) in THF, 0.1 M [N<sup>n</sup>Bu<sub>4</sub>]PF<sub>6</sub>, obtained at 23 °C at a scan rate of 100 mV s<sup>-1</sup>. E<sub>1/2red</sub> = -2.10 V (vs. FeCp<sub>2</sub>/[FeCp<sub>2</sub>]<sup>+</sup> redox couple)

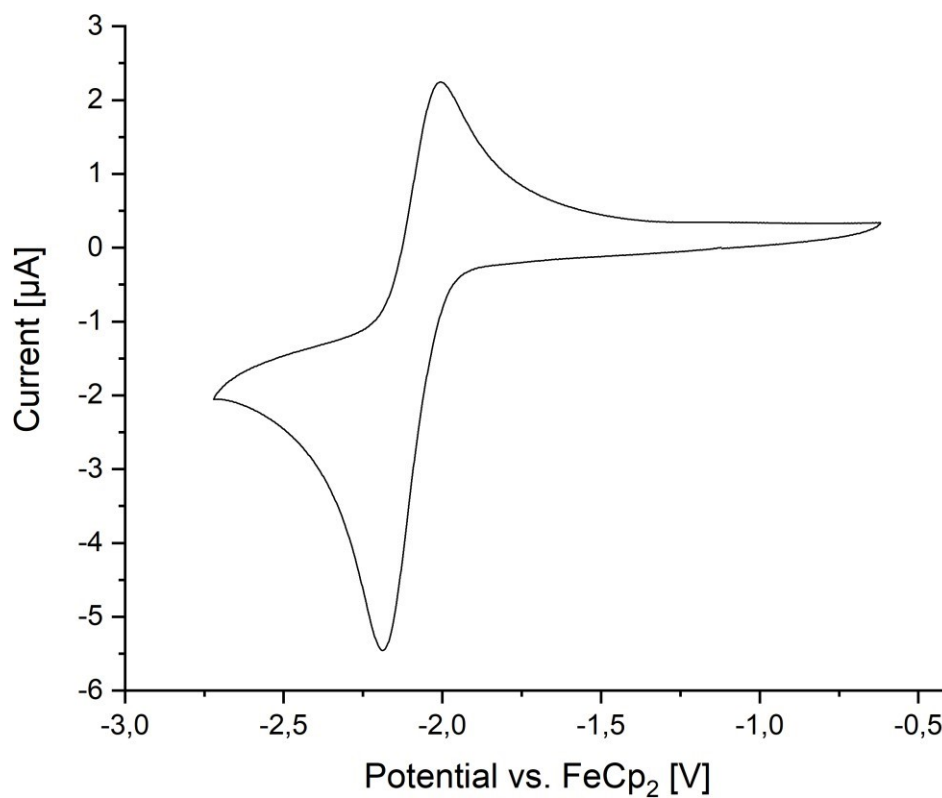

### 4.2.2 Thermal stability of **2**

A sample of (PDip)<sub>2</sub> (20 mg) was dissolved in C<sub>6</sub>D<sub>6</sub> in a J-Young NMR tube and was kept in the dark at room temperature. The sample was monitored via <sup>31</sup>P NMR spectroscopy over a period of 71 days. The conversion was determined via <sup>31</sup>P NMR integrals.

**Figure S43:** <sup>31</sup>P NMR spectra of Dip<sub>2</sub>P<sub>2</sub> in C<sub>6</sub>D<sub>6</sub> over a period of 71 days.

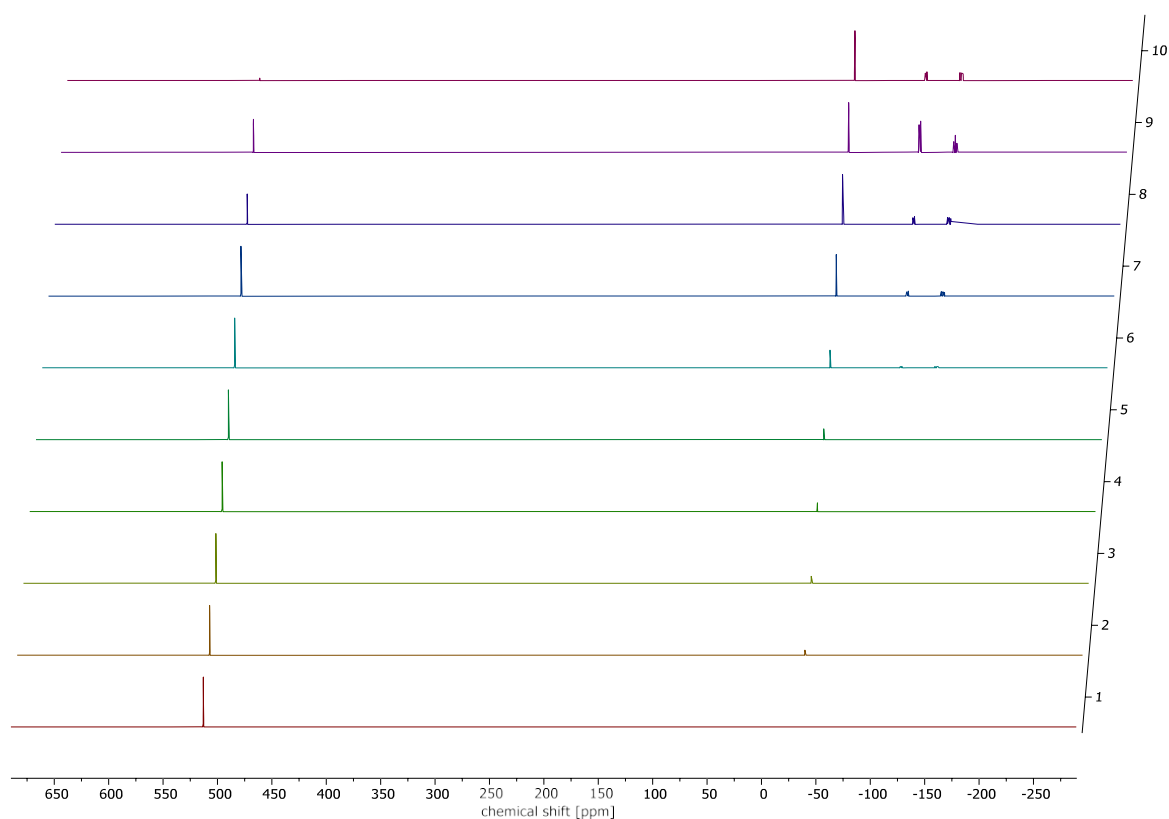

**Table S4.** Decay of (PDip)<sub>2</sub> monitored in a J-Young NMR tube. Ratios determined via <sup>31</sup>P NMR spectroscopy.

| Time [d] | Integrals determined via <sup>31</sup> P NMR spectra |                           |                                       | Conversion                          |                                     |                                     |
|----------|------------------------------------------------------|---------------------------|---------------------------------------|-------------------------------------|-------------------------------------|-------------------------------------|
|          | (PDip) <sub>2</sub> (int)                            | (PDip) <sub>3</sub> (int) | P <sub>4</sub> Dip <sub>4</sub> (int) | P <sub>2</sub> Dip <sub>2</sub> [%] | P <sub>3</sub> Dip <sub>3</sub> [%] | P <sub>4</sub> Dip <sub>4</sub> [%] |
| 0        | 1                                                    | 0                         | 0                                     | 100                                 | 0                                   | 0                                   |
| 0.80     | 1                                                    | 0                         | 0.01                                  | 99.5                                | 0.0                                 | 0.5                                 |
| 1.03     | 1                                                    | 0                         | 0.03                                  | 98.5                                | 0.0                                 | 1.5                                 |
| 1.67     | 1                                                    | 0                         | 0.04                                  | 98.0                                | 0.0                                 | 2.0                                 |
| 2.82     | 1                                                    | 0                         | 0.05                                  | 97.6                                | 0.0                                 | 2.4                                 |
| 3.83     | 1                                                    | 0                         | 0.06                                  | 97.1                                | 0.0                                 | 2.9                                 |
| 6.78     | 1                                                    | 0.01                      | 0.08                                  | 95.2                                | 1.0                                 | 3.8                                 |
| 8.74     | 1                                                    | 0.02                      | 0.11                                  | 93.0                                | 1.9                                 | 5.1                                 |
| 10.80    | 1                                                    | 0.05                      | 0.14                                  | 89.3                                | 4.5                                 | 6.3                                 |
| 16.01    | 1                                                    | 0.12                      | 0.2                                   | 82.0                                | 9.8                                 | 8.2                                 |

|       |   |       |       |      |      |      |
|-------|---|-------|-------|------|------|------|
| 23.20 | 1 | 0.46  | 0.48  | 58.8 | 27.1 | 14.1 |
| 32.11 | 1 | 1.21  | 1     | 36.9 | 44.6 | 18.5 |
| 46.14 | 1 | 3.67  | 2.39  | 17.1 | 62.6 | 20.4 |
| 71.02 | 1 | 16.66 | 11.62 | 4.3  | 71.0 | 24.8 |

**Figure S44:** Decay of (PDip)<sub>2</sub> in C<sub>6</sub>D<sub>6</sub> to Dip<sub>3</sub>P<sub>3</sub> and Dip<sub>4</sub>P<sub>4</sub>, giving a half-life time of ca. 28 days for **2**.

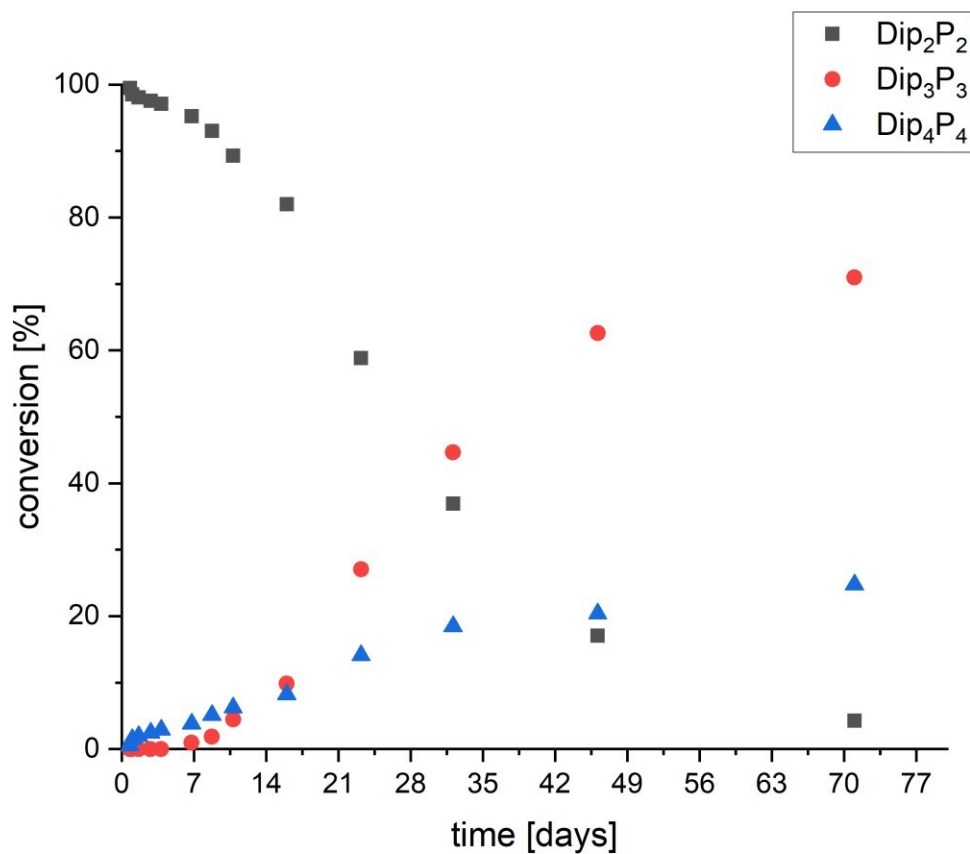

Based on this monitoring we can estimate a half life time of (PDip)<sub>2</sub>, which is ca. 27 days.

#### 4.2.3 Thermal stability of (PDip)<sub>2</sub> (**2**).

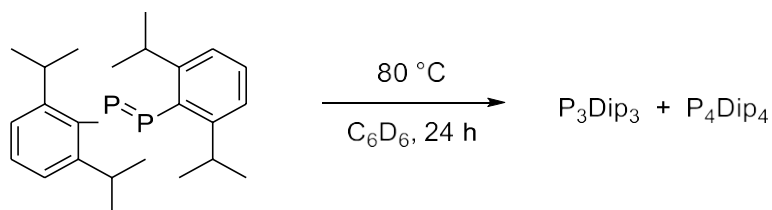

**Figure S45:** Decay of (PDip)<sub>2</sub> (**2**) in C<sub>6</sub>D<sub>6</sub> at 80 °C to Dip<sub>3</sub>P<sub>3</sub> and Dip<sub>4</sub>P<sub>4</sub>.

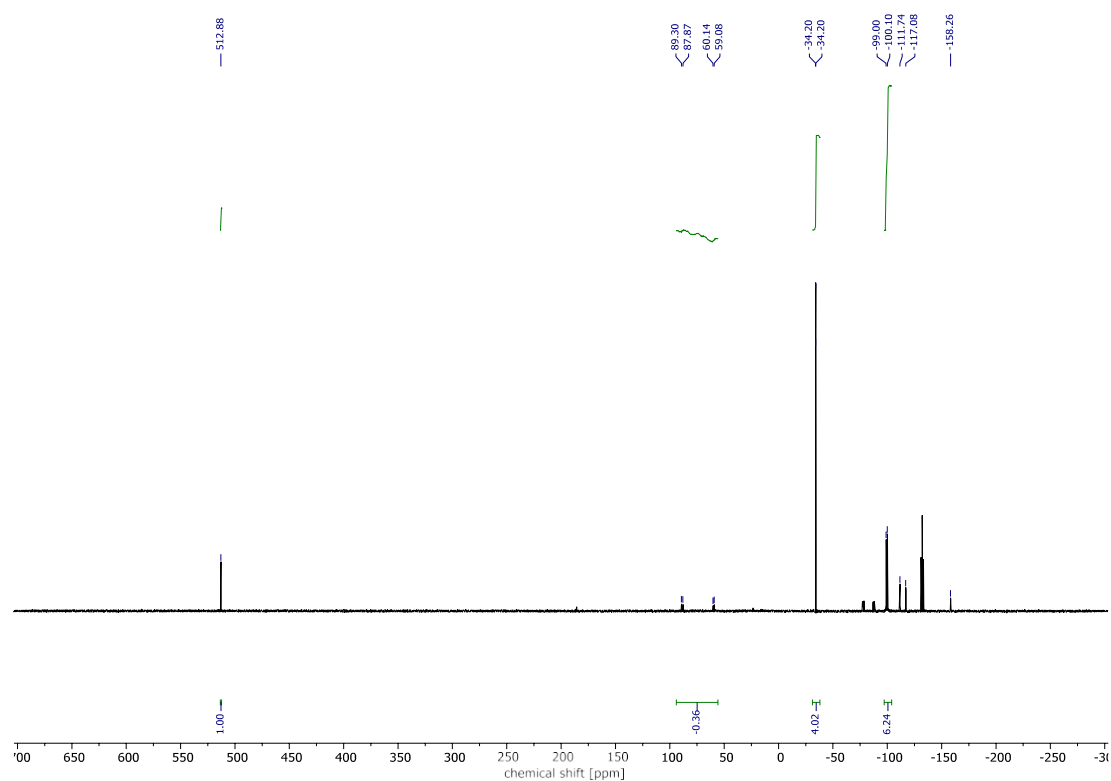

#### 4.2.4 Photochemical decay of (PDip)<sub>2</sub> (**2**) and UV-Vis data

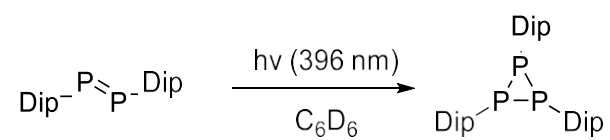

**Figure S46:** UV-Vis spectrum of Dip<sub>2</sub>P<sub>2</sub> in MeCN.

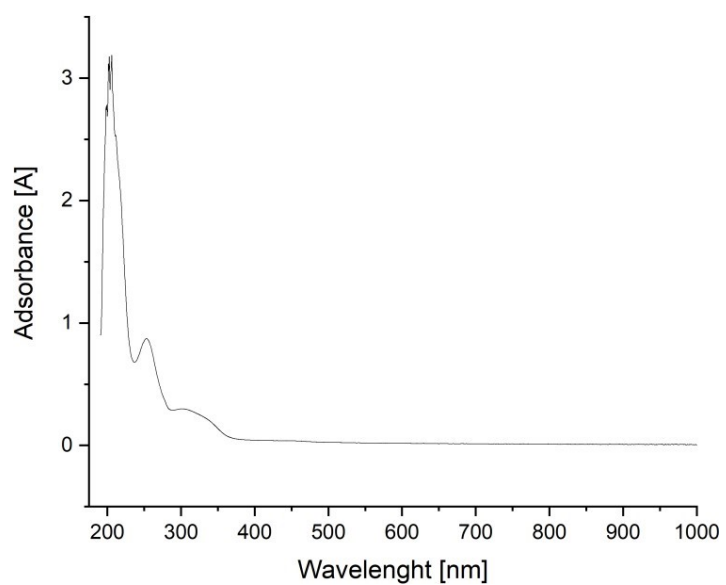

**Figure S47:** After irradiation with 396 nm light, the solution turned clear. The respective UV-Vis spectra show a shift in absorption maxima of  $\text{Dip}_2\text{P}_2$ . Spectra were recorded in MeCN.

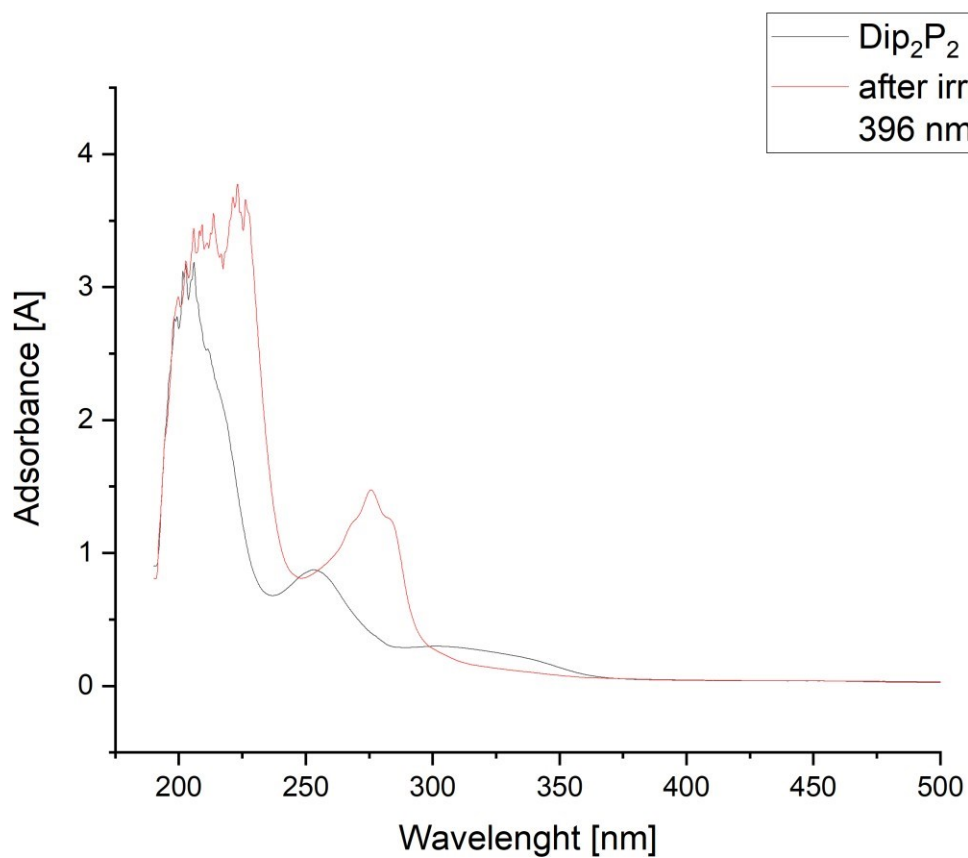

**Figure S48:** Light induced reaction monitored by  $^{31}\text{P}$  NMR. Bottom  $\text{Dip}_2\text{P}_2$ , top after irradiation  $\text{Dip}_3\text{P}_3$  the main product.

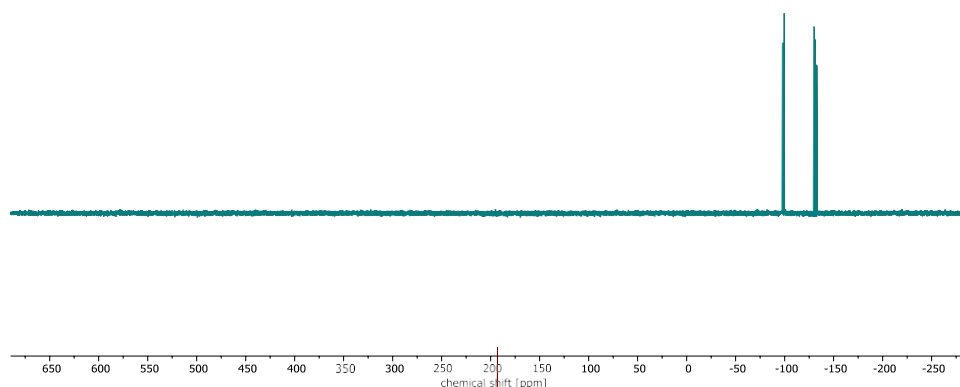

#### 4.2.5 Reaction of (PDip)<sub>2</sub> with Pd(II) salts

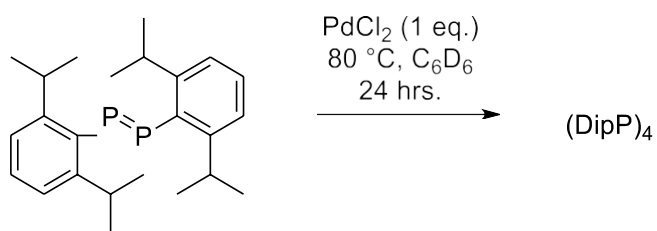

**Figure S49:** <sup>31</sup>P NMR of the reaction of Dip<sub>2</sub>P<sub>2</sub> with PdCl<sub>2</sub> (1 equiv) after 24 h.

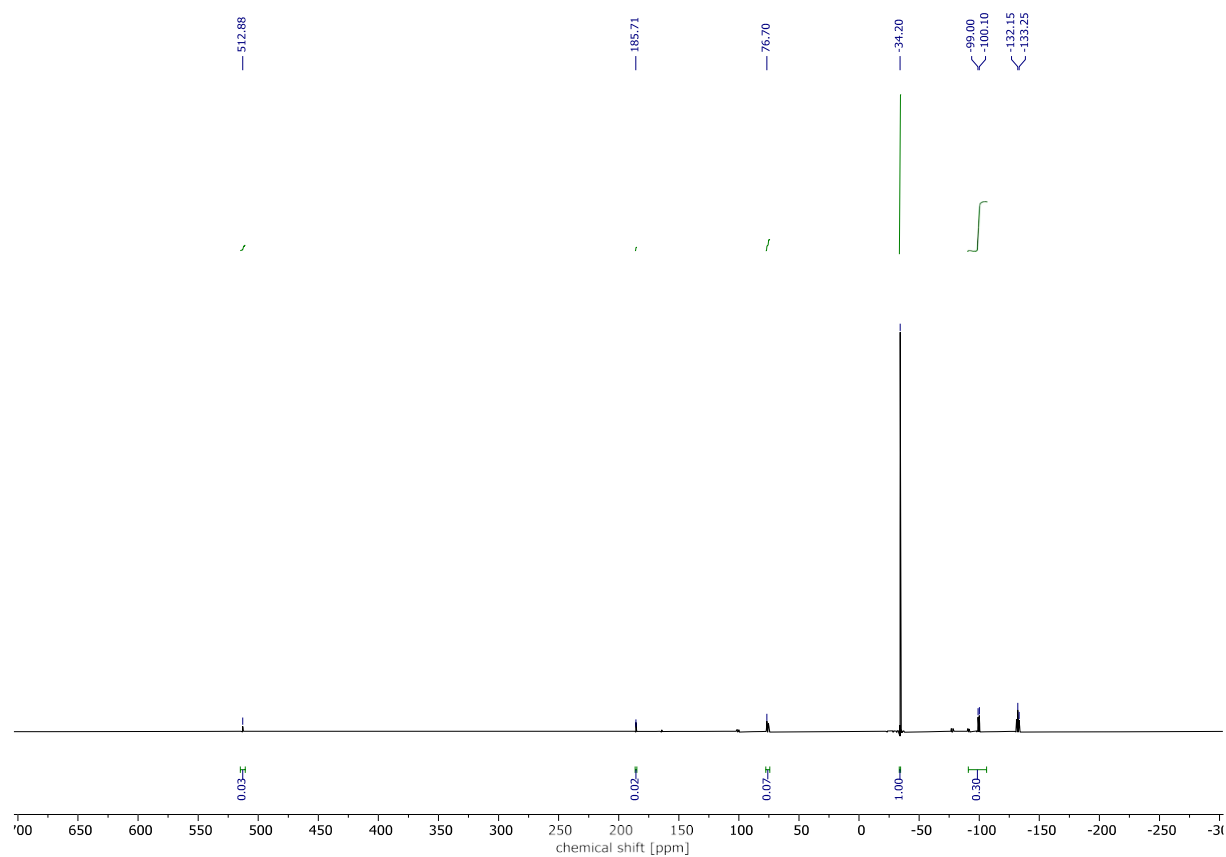

**Figure S50:**  $^1\text{H}$  NMR of the reaction of  $(\text{PDip})_2$  (**2**) with  $\text{PdCl}_2$  (1 equiv) after 24 hrs.

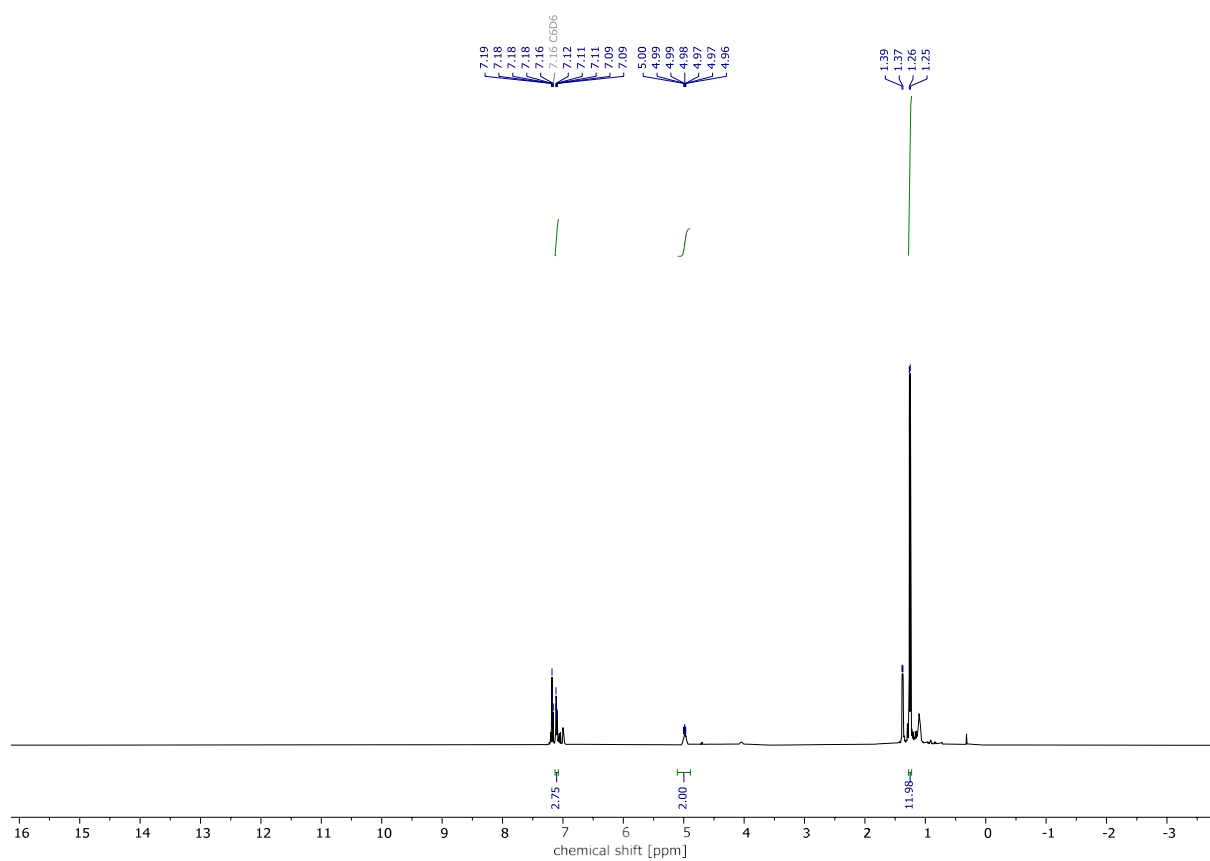

### 4.3 Synthesis of DipP=IMe<sub>4</sub> (5).

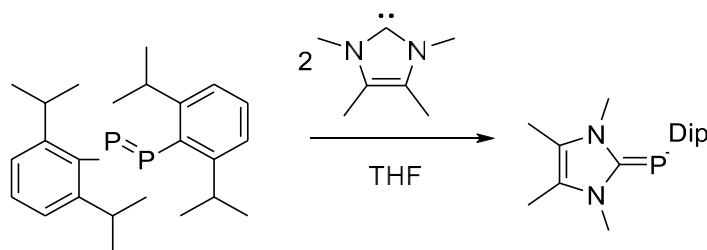

IMe<sub>4</sub> (11.6 mg, 0.0938 mmol) was dissolved in THF (5 mL) and cooled to  $-78\text{ }^{\circ}\text{C}$ . P<sub>2</sub>Dip<sub>2</sub> (18 mg, 0.0469 mmol) was dissolved in THF (2 mL) and was added dropwise to the stirred solution of IMe<sub>4</sub>. The solution was allowed to warm to room temperature over a period of two days. Afterwards the solvent was removed *in vacuo*. The resulting yellow oil was extracted with *n*-hexane and was concentrated to incipient crystallization. Standing at  $-30\text{ }^{\circ}\text{C}$  afforded DipP=IMe<sub>4</sub> (**5**) as yellow crystalline solid (14.7 mg, 0.046 mmol, 50 %).

X-ray quality crystals of **5** were grown from a saturated *n*-hexane solution at  $-30\text{ }^{\circ}\text{C}$ .

**<sup>1</sup>H NMR** (300 MHz, C<sub>6</sub>D<sub>6</sub>)  $\delta$  = 7.38 – 7.21 (m, 3H), 4.75 (hd,  $^3J_{\text{HH}}$  = 6.9 Hz,  $J_{\text{PH}}$  = 5.0 Hz, 2H, CH(CH<sub>3</sub>)<sub>2</sub>), 2.79 (d,  $J_{\text{PH}}$  = 1.2 Hz, 6H, NCH<sub>3</sub>), 1.36 (d,  $^3J_{\text{HH}}$  = 6.9 Hz, 12H), 1.26 (s, 6H) ppm. **<sup>31</sup>P NMR** (122 MHz, C<sub>6</sub>D<sub>6</sub>)  $\delta$  = -86.34 ppm. **<sup>13</sup>C NMR** (101 MHz, C<sub>6</sub>D<sub>6</sub>)  $\delta$  = 169.20 (d,  $^1J_{\text{PC}}$  = 103.0 Hz), 154.42 (d,  $J_{\text{PC}}$  = 8.4 Hz), 140.79 (d,  $J_{\text{PC}}$  = 48.4 Hz), 127.12, 122.76, 120.70 (d,  $J_{\text{PC}}$  = 3.6 Hz), 33.92 (d,  $J_{\text{PC}}$  = 11.8 Hz), 32.17 (d,  $J_{\text{PC}}$  = 12.8 Hz), 24.38, 8.40. **IR** (ATR, 32 scans, cm<sup>-1</sup>):  $\nu$ = 2948.8 (s), 2915.5 (m), 2857.6 (m), 1670.6 (w), 1459.8 (s), 1435.8 (m), 1413.4 (w), 1369.0 (s), 1351.2 (s), 1336.2 (s), 1303.9 (s), 1245.6 (w), 1222.0 (w), 1162.8 (m), 1125.6 (w), 1094.3 (s), 1051.7 (m), 1026.6 (m), 925.5 (w), 851.8 (m), 801.1 (s), 749.6 (s), 643.4 (w), 585.7 (w), 562.1 (w), 520.4 (w), 499.6 (w), 431.5 (w) cm<sup>-1</sup>. **EA** calc. C 72.12% H 9.24% N 8.85%, obs. C 72.34%, H 9.47%, N 8.51%.

**Figure S51:**  $^1\text{H}$  NMR spectrum of DipP=IME<sub>4</sub> (5) in C<sub>6</sub>D<sub>6</sub> at r.t.

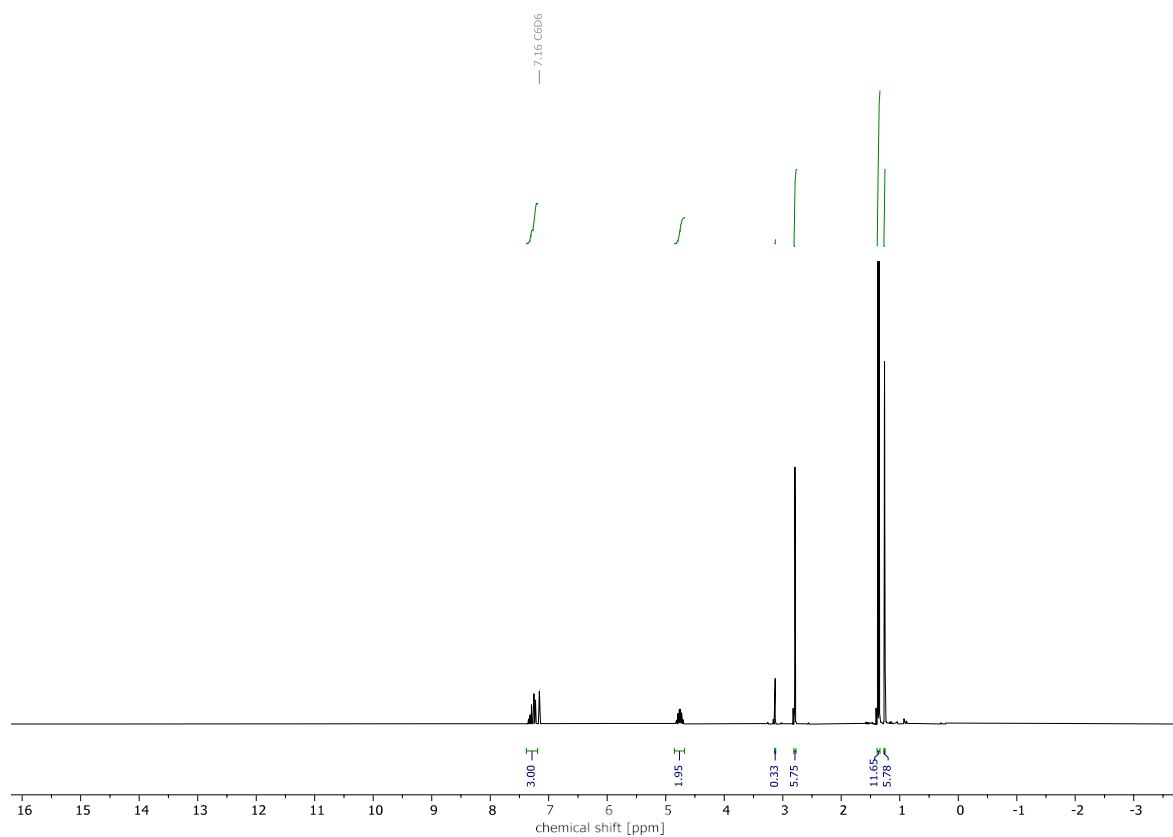

**Figure S52:**  $^{13}\text{C}$  NMR spectrum of DipP=IME<sub>4</sub> (5) in C<sub>6</sub>D<sub>6</sub> at r.t.

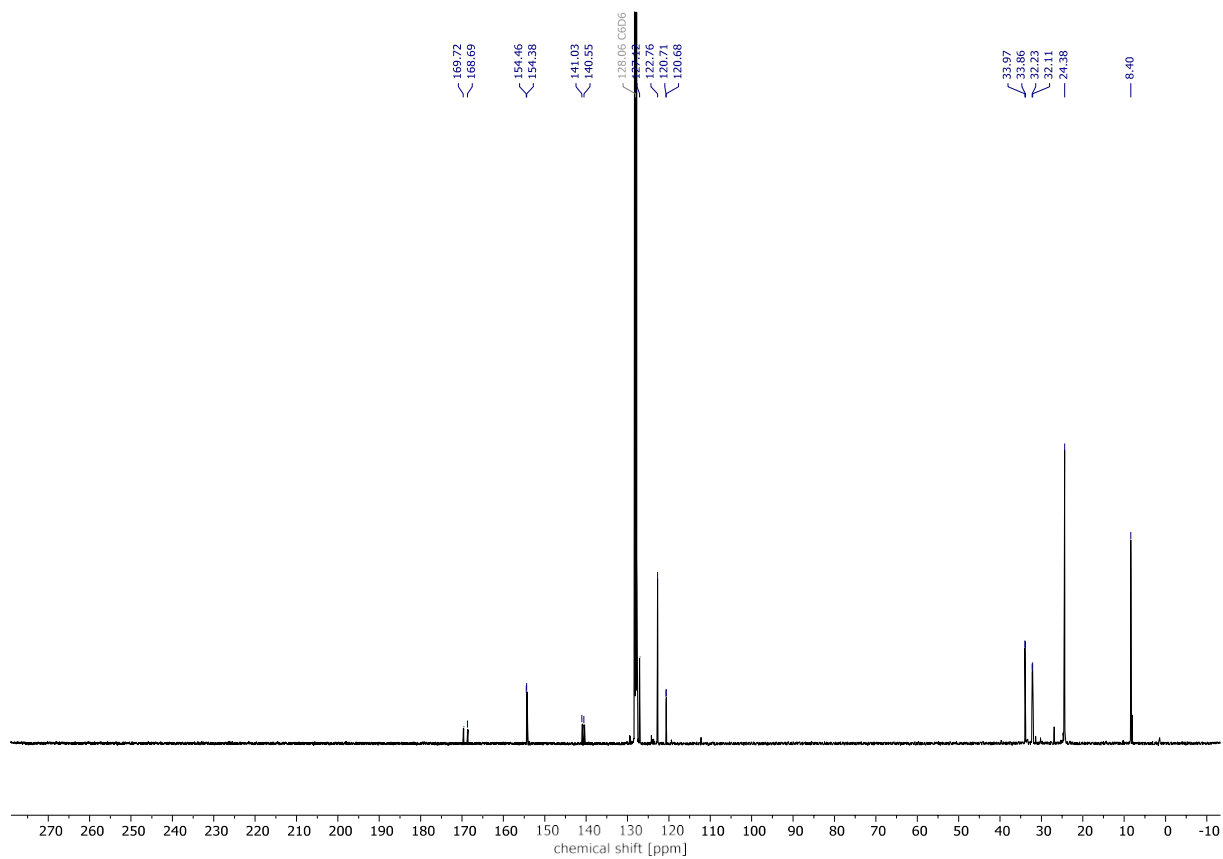

**Figure S53:**  $^{31}\text{P}\{^1\text{H}\}$  NMR spectrum of DipP=IMe<sub>4</sub> (**5**) in C<sub>6</sub>D<sub>6</sub> at r.t.

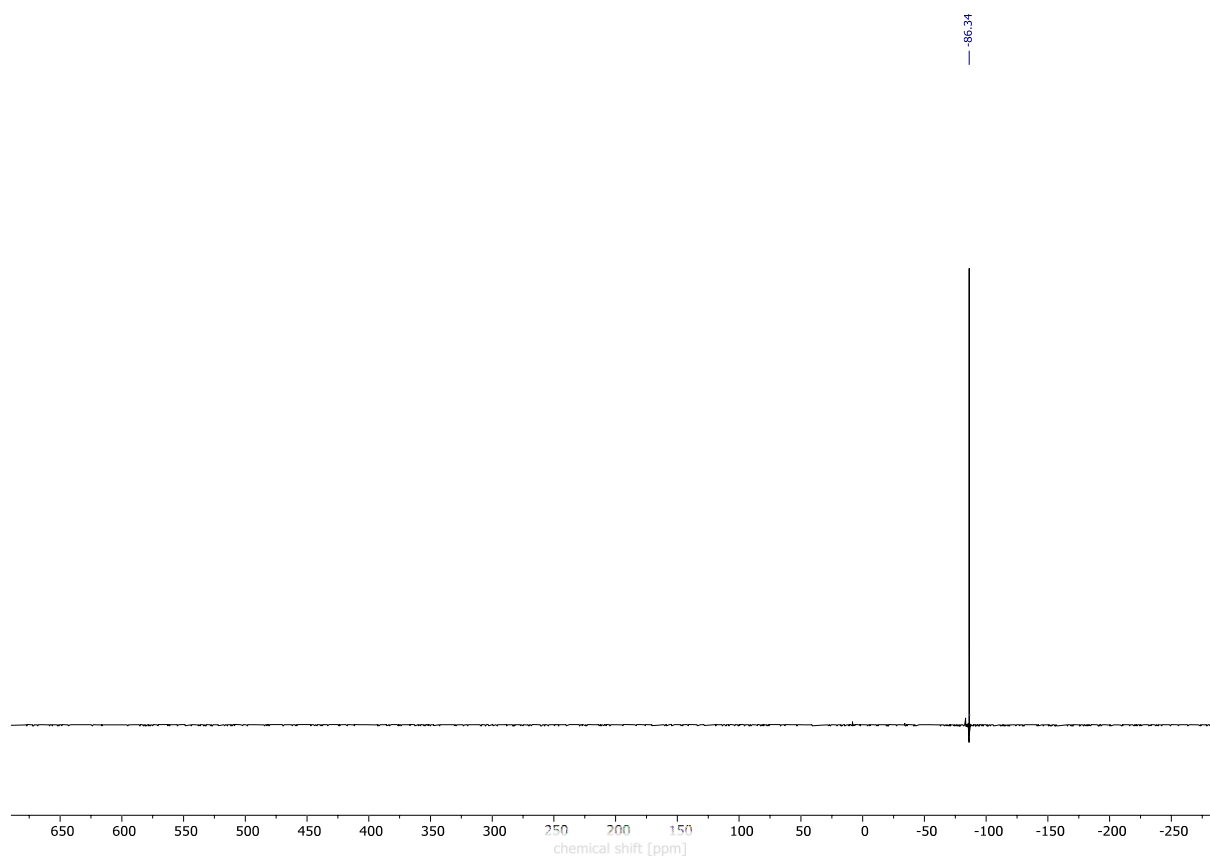

**Figure S54:** IR spectrum of crystalline DipP=IMe<sub>4</sub>.

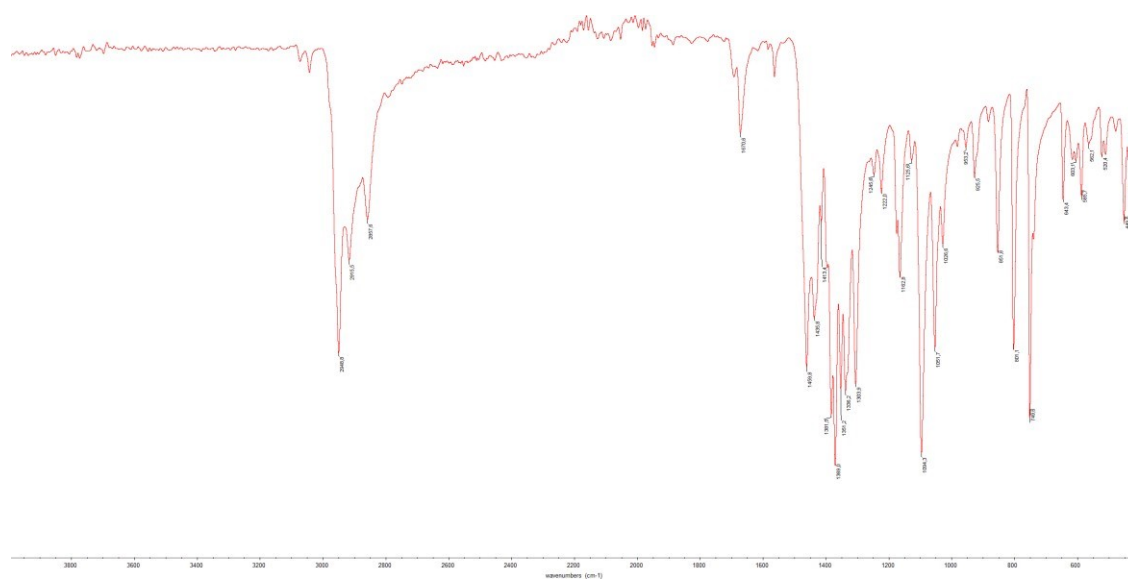

## 4.4 Synthesis of (Mes<sub>2</sub>P)<sub>2</sub> (6).

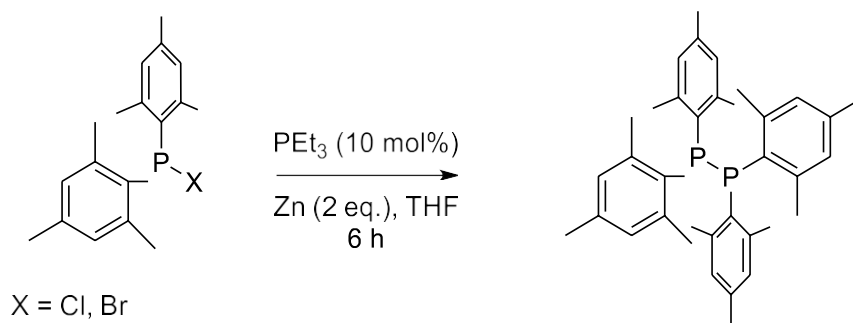

To Mes<sub>2</sub>PX (0.475 g, 1.46 mmol) and zinc (0.186 g, 2 eq.) THF (20 mL) was added. PEt<sub>3</sub> (1.46 mL, 0.1 M in THF, 0.2 mmol) was added dropwise to the stirring mixture. After 6 h all volatiles were removed in vacuo and the white residue was extracted with benzene (20 mL). The solvent was removed in vacuo and the white crystalline solid was washed with pentane (2x 2 mL) yielding (Mes<sub>2</sub>P)<sub>2</sub> (**6**) (0.338 g, 0.63 mmol, 86 %).

**<sup>1</sup>H NMR** (300 MHz, C<sub>6</sub>D<sub>6</sub>) δ = 6.61 (s, 2H), 2.81 – 2.17 (m, 6H), 2.02 (s, 3H) ppm.

**<sup>31</sup>P NMR** (300 MHz, C<sub>6</sub>D<sub>6</sub>) δ = –30.4 ppm.

**Figure S55:** <sup>1</sup>H NMR spectrum of (Mes<sub>2</sub>P)<sub>2</sub> in C<sub>6</sub>D<sub>6</sub> at r.t.

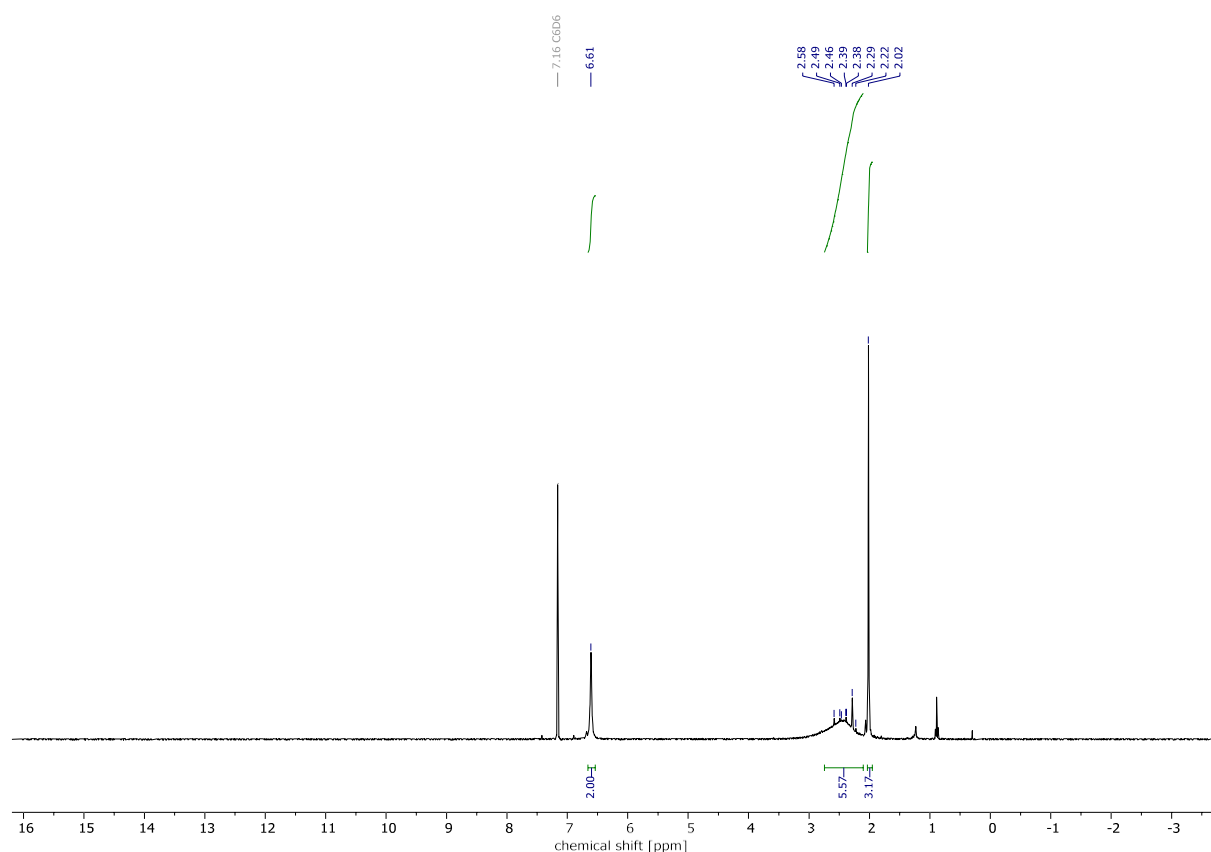

**Figure S56:**  $^{31}\text{P}$  NMR spectrum of  $(\text{Mes}_2\text{P})_2$  in  $\text{C}_6\text{D}_6$  at r.t.

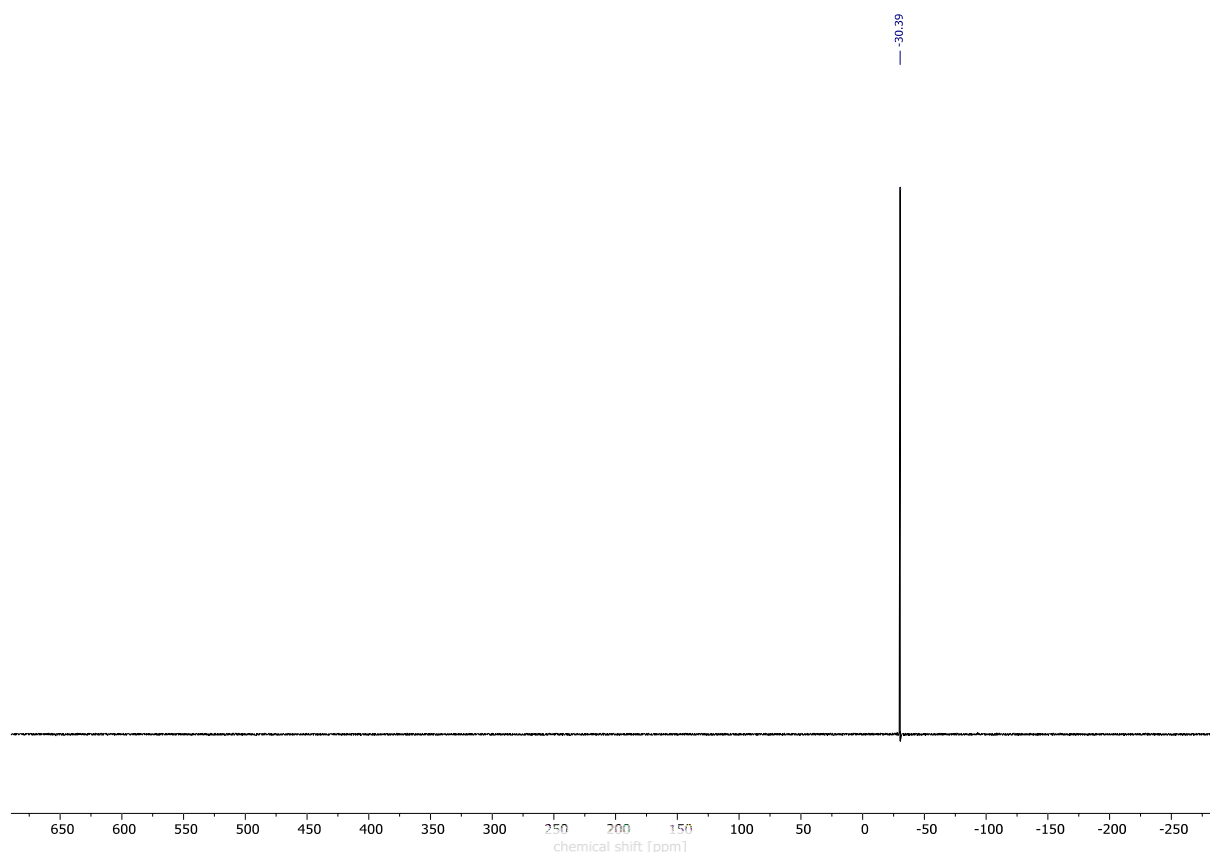

#### 4.5 Synthesis of $(\text{Ph}_2\text{P})_2$ (7).

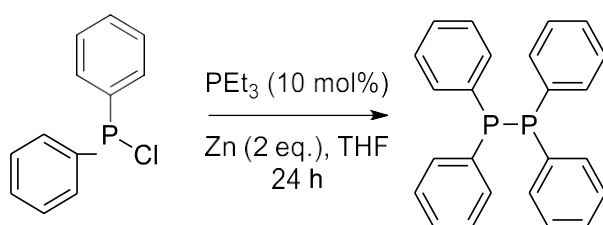

To  $\text{Ph}_2\text{P-Cl}$  (0.244 g, 1.1 mmol) and zinc (0.140 g, 2.2 eq.) THF (10 mL) was added.  $\text{PEt}_3$  (1.1 mL, 0.1 M in THF, 0.11 mmol) was added dropwise to the stirring mixture. After 24 h all volatiles were removed in vacuo and the white residue was extracted with benzene (20 mL). The solvent was removed in vacuo and the white crystalline solid was washed with *n*-pentane (2x 2 mL) at  $-30^\circ\text{C}$  yielding  $(\text{Ph}_2\text{P})_2$  (**6**) (0.117 g, 0.32 mmol, 58 %).

**$^1\text{H}$  NMR** (300 MHz,  $\text{C}_6\text{D}_6$ )  $\delta$  7.64 – 7.55 (m, 2H), 7.02 – 6.93 (m, 3H) ppm.  **$^{31}\text{P}$  NMR** (122 MHz,  $\text{C}_6\text{D}_6$ )  $\delta$  -14.30 ppm.<sup>[6]</sup>

**$^1\text{H}$  NMR** (300 MHz,  $\text{THF-d}_8$ )  $\delta$  7.41 – 7.31 (m, 2H), 7.27 – 7.06 (m, 3H).  **$^{31}\text{P}$  NMR** (122 MHz,  $\text{THF-d}_8$ )  $\delta$  -15.62.

## 5 Structure elucidation

**X-ray Structure Determination:** X-ray quality crystals of all compounds were selected in Fomblin YR-1800 perfluoroether (Alfa Aesar) at ambient temperature or in Fomblin® Y perfluoroether (Sigma Aldrich) at  $-30\text{ }^{\circ}\text{C}$  under a constant stream of nitrogen. The samples were cooled to 150(2) K during measurement. The data were collected on a Bruker Kappa Apex II diffractometer using Mo  $K_{\alpha}$  radiation ( $\lambda = 0.71073\text{ \AA}$ ) or Cu  $K_{\alpha}$  radiation ( $\lambda = 1.54178\text{ \AA}$ ), or on a STOE-IPDS II diffractometer using Mo  $K_{\alpha}$  radiation ( $\lambda = 0.71073\text{ \AA}$ ) at 150(2) K. The structures were solved by iterative methods (SHELXT)<sup>[7]</sup> and refined by full matrix least squares procedures (SHELXL).<sup>[8]</sup> Semi-empirical absorption corrections were applied (SADABS<sup>[9]</sup> or LANA). All non-hydrogen atoms were refined anisotropically, hydrogen atoms were included in the refinement at calculated positions using a riding model.

In *S,S*-**1** the second Tip-group was found to be disordered and was split into two parts. The occupancy of each part was allowed to refine freely.

**Table S5:** Crystallographic details of *R,S*-**1**, *S,S*-**1** and **2**.

| Compound                                                                                 | <i>R,S</i> - <b>1</b>                                          | <i>S,S</i> - <b>1</b>                                          | <b>2</b>                                       |
|------------------------------------------------------------------------------------------|----------------------------------------------------------------|----------------------------------------------------------------|------------------------------------------------|
| Chem. Formula                                                                            | C <sub>30</sub> H <sub>46</sub> P <sub>2</sub> Br <sub>2</sub> | C <sub>30</sub> H <sub>46</sub> P <sub>2</sub> Br <sub>2</sub> | C <sub>24</sub> H <sub>34</sub> P <sub>2</sub> |
| Formula weight [g/mol]                                                                   | 628.43                                                         | 628.43                                                         | 384.45                                         |
| Colour                                                                                   | yellow                                                         | yellow                                                         | yellow                                         |
| Crystal system                                                                           | orthorhombic                                                   | triclinic                                                      | monoclinic                                     |
| Space group                                                                              | <i>Pbca</i>                                                    | <i>P1</i>                                                      | <i>P2<sub>1</sub>/n</i>                        |
| <i>a</i> [Å]                                                                             | 9.0324(4)                                                      | 9.7477(16)                                                     | 6.1450(12)                                     |
| <i>b</i> [Å]                                                                             | 16.1088(8)                                                     | 12.232(2)                                                      | 8.4640(17)                                     |
| <i>c</i> [Å]                                                                             | 21.3757(11)                                                    | 13.591(2)                                                      | 21.620(4)                                      |
| $\alpha$ [°]                                                                             | 90                                                             | 90.634(4)                                                      | 90                                             |
| $\beta$ [°]                                                                              | 90                                                             | 102.776(3)                                                     | 92.81(3)                                       |
| $\gamma$ [°]                                                                             | 90                                                             | 96.594(3)                                                      | 90                                             |
| <i>V</i> [Å <sup>3</sup> ]                                                               | 3110.2(3)                                                      | 1568.8(4)                                                      | 1123.1(4)                                      |
| <i>Z</i>                                                                                 | 4                                                              | 2                                                              | 2                                              |
| $\rho_{\text{calcd.}}$ [g/cm <sup>3</sup> ]                                              | 1.342                                                          | 1.330                                                          | 1.137                                          |
| $\mu$ [mm <sup>-1</sup> ]                                                                | 2.726                                                          | 2.702                                                          | 0.199                                          |
| <i>T</i> [K]                                                                             | 150(2)                                                         | 150(2)                                                         | 150(2)                                         |
| Measured reflections                                                                     | 39293                                                          | 76651                                                          | 21095                                          |
| Independent reflections                                                                  | 4538                                                           | 9672                                                           | 3038                                           |
| Reflections with $I > 2\sigma(I)$                                                        | 3482                                                           | 8242                                                           | 2480                                           |
| <i>R</i> <sub>int</sub>                                                                  | 0.0404                                                         | 0.0276                                                         | 0.0276                                         |
| <i>F</i> (000)                                                                           | 1304                                                           | 652                                                            | 416                                            |
| <i>R</i> <sub>1</sub> [ <i>R</i> [ <i>F</i> <sup>2</sup> > 2σ( <i>F</i> <sup>2</sup> )]] | 0.0293                                                         | 0.0261                                                         | 0.0305                                         |
| <i>wR</i> <sub>2</sub> ( <i>F</i> <sup>2</sup> )                                         | 0.0757                                                         | 0.0713                                                         | 0.0865                                         |
| GooF                                                                                     | 1.020                                                          | 1.026                                                          | 1.028                                          |
| No. of Parameters                                                                        | 160                                                            | 443                                                            | 122                                            |
| CCDC #                                                                                   | 2098825                                                        | 2098826                                                        | 2098827                                        |

**Table S6:** Crystallographic details of **4** and **5**.

| Compound                                                                                          | <b>4</b>                                         | <b>5</b>                                                                       |
|---------------------------------------------------------------------------------------------------|--------------------------------------------------|--------------------------------------------------------------------------------|
| Chem. Formula                                                                                     | C <sub>19</sub> H <sub>29</sub> N <sub>2</sub> P | C <sub>48</sub> H <sub>68</sub> P <sub>4</sub> 2 C <sub>6</sub> H <sub>6</sub> |
| Formula weight [g/mol]                                                                            | 316.41                                           | 925.12                                                                         |
| Colour                                                                                            | yellow                                           | colourless                                                                     |
| Crystal system                                                                                    | Monoclinic                                       | Tetragonal                                                                     |
| Space group                                                                                       | <i>P</i> 2 <sub>1</sub> / <i>n</i>               | <i>P</i> 4 <sub>1</sub> 2                                                      |
| <i>a</i> [Å]                                                                                      | 14.2549(15)                                      | 11.9767(2)                                                                     |
| <i>b</i> [Å]                                                                                      | 9.7910(10)                                       | 11.9767(2)                                                                     |
| <i>c</i> [Å]                                                                                      | 14.6252(15)                                      | 19.3408(4)                                                                     |
| $\alpha$ [°]                                                                                      | 90                                               | 90                                                                             |
| $\beta$ [°]                                                                                       | 115.911(2)                                       | 90                                                                             |
| $\gamma$ [°]                                                                                      | 90                                               | 90                                                                             |
| <i>V</i> [Å <sup>3</sup> ]                                                                        | 1836.0(3)                                        | 2774.27(11)                                                                    |
| <i>Z</i>                                                                                          | 4                                                | 2                                                                              |
| $\rho_{\text{calcd.}}$ [g/cm <sup>3</sup> ]                                                       | 1.145                                            | 1.147                                                                          |
| $\mu$ [mm <sup>-1</sup> ]                                                                         | 0.149                                            | 0.242                                                                          |
| <i>T</i> [K]                                                                                      | 150(2)                                           | 150(2)                                                                         |
| Measured reflections                                                                              | 21175                                            | 24887                                                                          |
| Independent reflections                                                                           | 4961                                             | 4057                                                                           |
| Reflections with <i>I</i> > 2 $\sigma$ ( <i>I</i> )                                               | 4003                                             | 3689                                                                           |
| <i>R</i> <sub>int</sub>                                                                           | 0.0296                                           | 0.0316                                                                         |
| <i>F</i> (000)                                                                                    | 688                                              | 1000                                                                           |
| <i>R</i> <sub>1</sub> [ <i>R</i> [ <i>F</i> <sup>2</sup> > 2 $\sigma$ ( <i>F</i> <sup>2</sup> )]] | 0.0407                                           | 0.0357                                                                         |
| <i>wR</i> <sub>2</sub> ( <i>F</i> <sup>2</sup> )                                                  | 0.1118                                           | 0.0951                                                                         |
| GooF                                                                                              | 1.014                                            | 1.048                                                                          |
| No. of Parameters                                                                                 | 207                                              | 151                                                                            |
| CCDC #                                                                                            | 2098828                                          | 2098829                                                                        |

**Figure S57:** Molecular structure of **4**. Hydrogen atoms have been omitted and *i*Pr-groups rendered as wireframe for clarity. Thermal ellipsoids are drawn at the 50% probability level. Selected bond lengths (Å) and angles (°): P1–C1 1.8562(18), P1–P' 2.2231(9), P1–P1'' 2.2563(9); C1–P1–P1' 104.45(6), C1–P1–P1'' 113.64(6); P1'–P1–P1'' 82.158(14); P1'''–P1'–P1–P1'' -40.181(19).

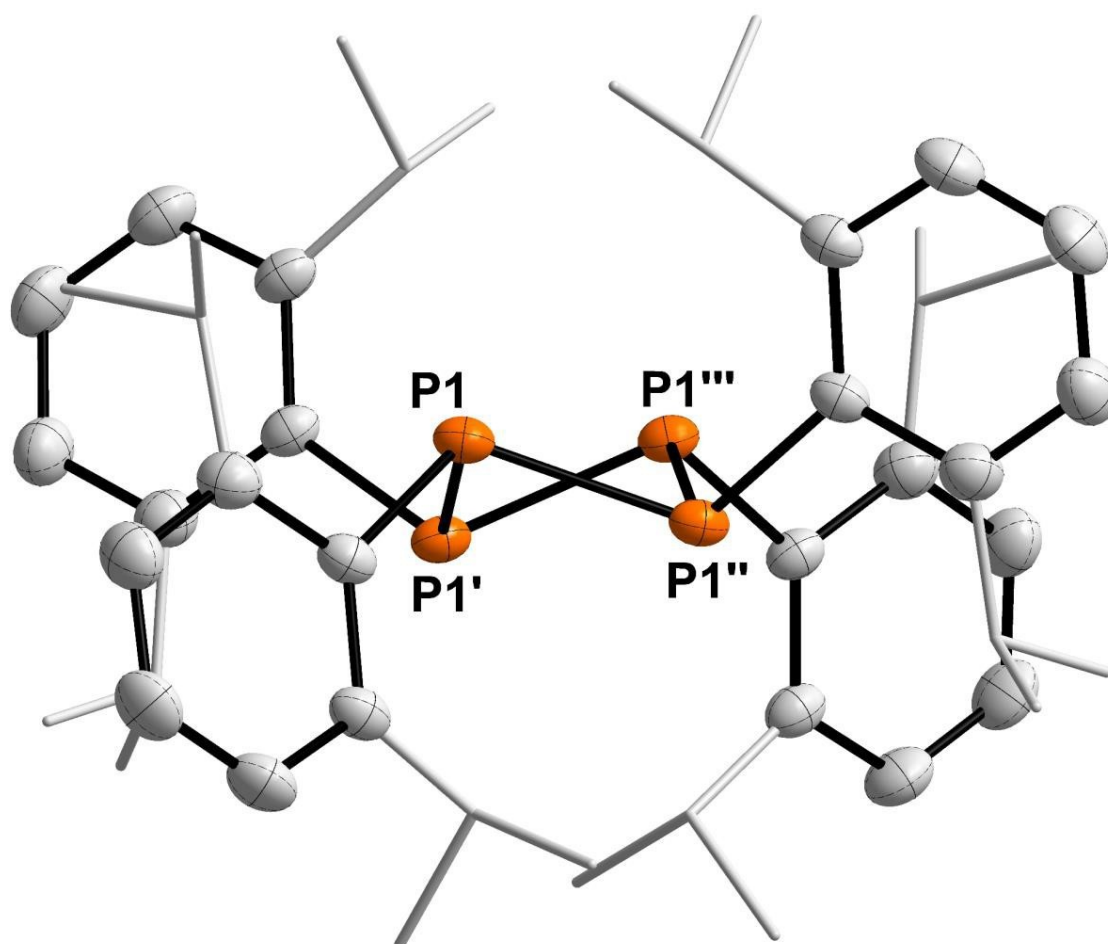

## 6 Computational details

### 6.1 General remarks

Computations were carried out using Gaussian09<sup>[10]</sup> and the standalone version of NBO 6.0.<sup>[11]</sup>

Structure optimizations employed the hybrid DFT functional PBE0<sup>[12]</sup> in conjunction with Grimme's dispersion correction D3(BJ)<sup>[13]</sup> and the def2-TZVP basis set<sup>[14]</sup> (notation PBE0-D3/def2-TZVP). All structures were fully optimized and confirmed as minima by frequency analyses. Partial charges were determined by Natural Population analysis using the NBO program. Chemical shifts were derived by the GIAO method at the PBE0-D3/def2-TZVP level of theory.<sup>[15]</sup> The calculated absolute shifts ( $\sigma_{\text{calc},X}$ ) were referenced to the experimental absolute shift of 85%  $\text{H}_3\text{PO}_4$  in the gas phase ( $\sigma_{\text{ref},1} = 328.35$  ppm),<sup>[16]</sup> using  $\text{PH}_3$  ( $\sigma_{\text{ref},2} = 594.45$  ppm) as a secondary standard:<sup>[17]</sup>

$$\begin{aligned}\delta_{\text{calc},X} &= (\sigma_{\text{ref},1} - \sigma_{\text{ref},2}) - (\sigma_{\text{calc},X} - \sigma_{\text{calc},\text{PH}_3}) \\ &= \sigma_{\text{calc},\text{PH}_3} - \sigma_{\text{calc},X} - 266.1 \text{ ppm}\end{aligned}$$

At the PBE0-D3/def2-TZVP level of theory,  $\sigma_{\text{calc},\text{PH}_3}$  amounts to +571.6 ppm.

Please note that all computations were carried out for single, isolated molecules in the gas phase (ideal gas approximation). There may well be significant differences between the gas phase structures and those in the condensed phase.

### 6.2 Thermodynamic observations

#### 6.2.1 Relative stability of $\text{Dip}_2\text{P}_2$ (**2**)

We observed the decomposition of  $\text{Dip}_2\text{P}_2$  (**2**) into  $\text{Dip}_3\text{P}_3$  (**3**) and  $\text{Dip}_4\text{P}_4$  (**4**) over several weeks at room temperature under the exclusion of light. Therefore, we calculated the relative stability of diphosphene **2** with respect to the 3- and 4-membered cyclo-oligophosphanes **3** and **4**. These results indicate that **2** is thermodynamically unstable with respect to **3** and **4**, with  $\text{Dip}_3\text{P}_3$  (**3**) being thermodynamically more stable than  $\text{Dip}_4\text{P}_4$  (**4**). This is in line with **3** being the predominant product after 71 d.

**Figure S58:** Calculated enthalpy and Gibbs free energy at the PBE0-D3/DEF2-TZVP level of theory.

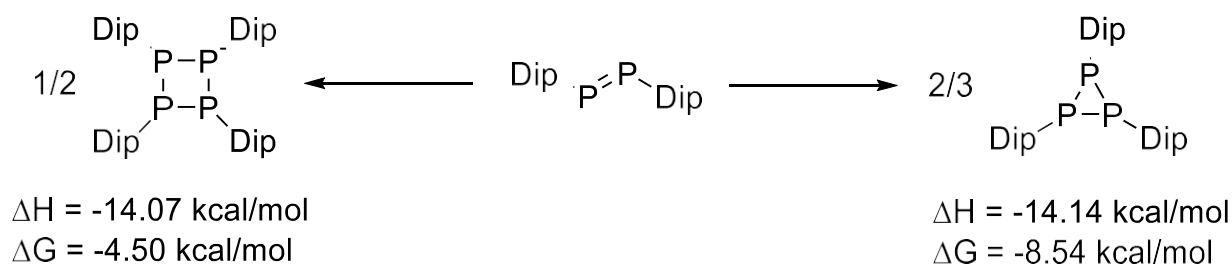

## 6.2.2 Relative stability of (TipPBr)<sub>2</sub> (**1**)

Compound **1** forms as a mixture of both *meso*-**1** and *rac*-**1** and the relative stability of both forms was determined based on the molecular structures of both forms obtained by single crystal X-Ray crystallography. This shows that *meso*-**1** in which both bromine atoms are in *trans* position is more stable than *rac*-**1**.

**Figure S59:** Calculated enthalpy and total Gibbs free energy at the PBE0-D3/DEF2-TZVP level of theory.

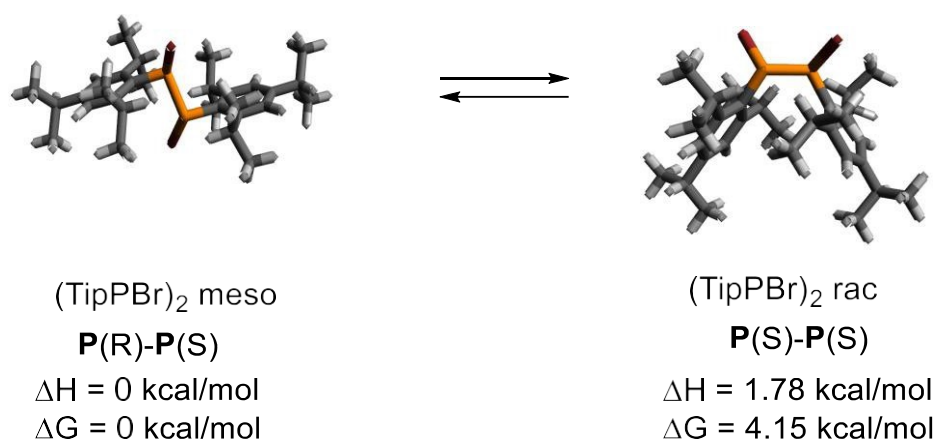

## 6.2.3 Disproportionation of (TipPBr)<sub>2</sub> (**1**)

**Figure S60:** Calculated enthalpy and total Gibbs free energy at the PBE0-D3/DEF2-TZVP level of theory for the disproportionation of (TipPBr)<sub>2</sub>.

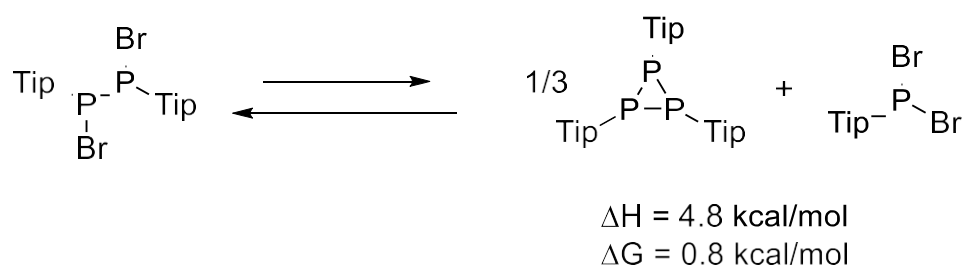

## 6.2.4 Calculated UV-Vis spectra

**Table S7.** Calculated electronic excitations of (PDip)<sub>2</sub> (**2**) (PBE0-D3/def2-TZVP).

| State | Symmetry                    | $\lambda$ [nm] | Oscillator strength | Main excitation            |
|-------|-----------------------------|----------------|---------------------|----------------------------|
| S1    | <sup>1</sup> B <sub>G</sub> | 459            | 0.0000              | HOMO→LUMO                  |
| S2    | <sup>1</sup> B <sub>G</sub> | 343            | 0.0067              | HOMO-3→LUMO<br>HOMO-1→LUMO |
| S3    | <sup>1</sup> A <sub>G</sub> | 341            | 0.0000              | HOMO-2→LUMO+2              |

**Figure S61.** Relevant Kohn-Sham orbitals of (PDip)<sub>2</sub> (**2**) (PBE0-D3/def2-TZVP).

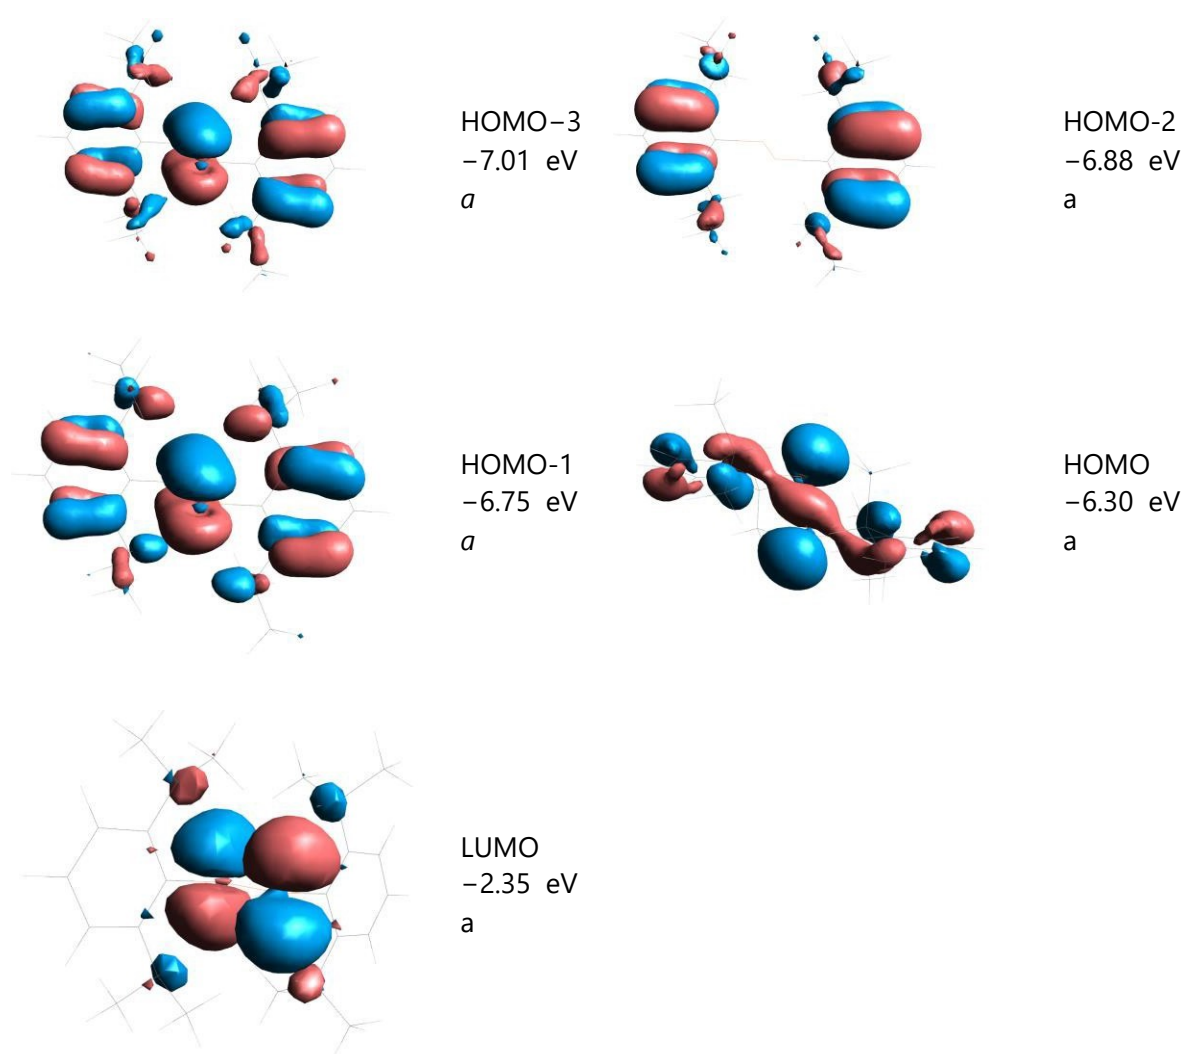

### 6.3 Bonding analysis of (PDip)<sub>2</sub> (**2**)

The HOMO of P<sub>2</sub>Dip<sub>2</sub> shows the  $\sigma$ -type lone pairs located at the P-atoms. The HOMO-1 resembles the P  $\pi$ -bond. The LUMO exhibits  $\pi^*$  antibonding character. Furthermore, the NBO analysis confirms the double bonded character and the respective P–P  $\sigma$  and  $\pi$  bonds are depicted in Figure S45 (NLMOs) along with the s-type LP on phosphorus. The Wiberg bond index (WBI) of the P=P bond is 1.83 in line with a double bond.

**Figure S62:** Relevant Kohn-Sham orbitals of Dip<sub>2</sub>P<sub>2</sub> (point group C<sub>2h</sub>, PBE0-D3/def2-TZVP).

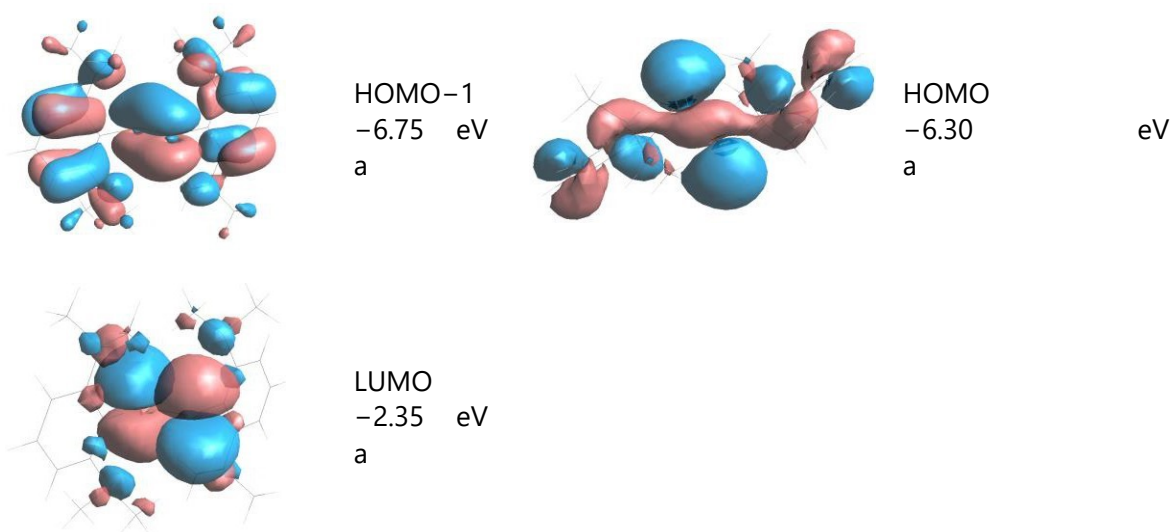

**Figure S63:** Selected NLMOs of Dip<sub>2</sub>P<sub>2</sub> (point group C<sub>2h</sub>, PBE0-D3/def2-TZVP).

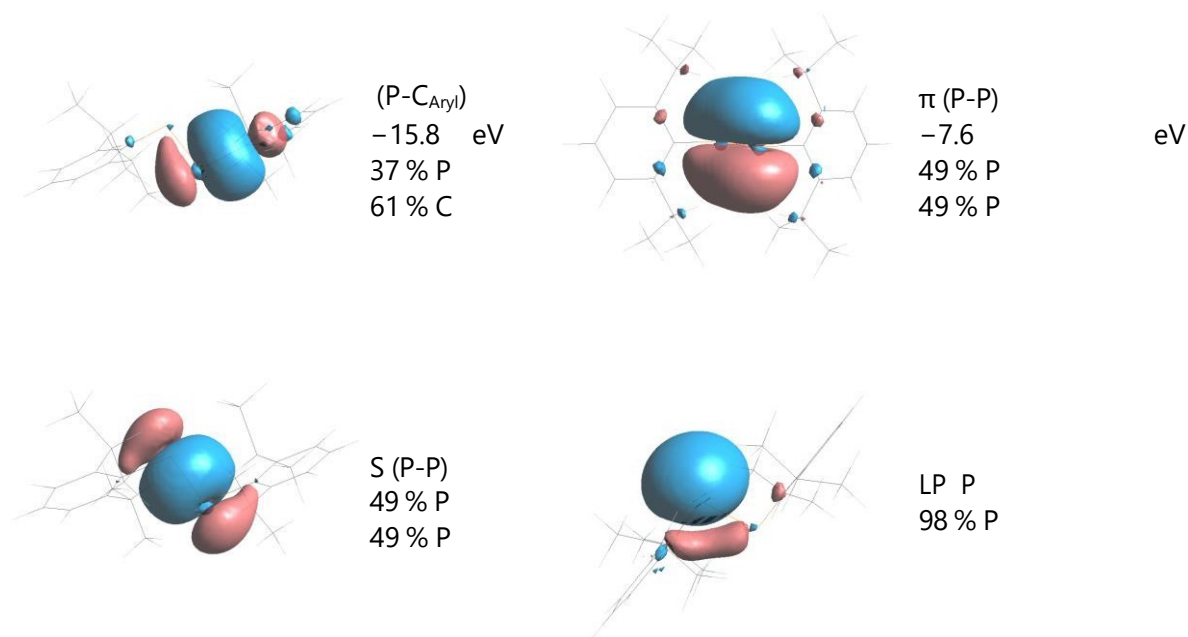

## 6.4 Calculated $^{31}\text{P}$ -NMR shifts

**Table S8.** Calculated  $^{31}\text{P}$ -NMR shifts at PBE0-D3/def2-TZVP using  $\text{PH}_3$  as internal standard.

| Structure                | $\delta$ exp. [ppm] | $\delta$ calc [ppm] |
|--------------------------|---------------------|---------------------|
| $\text{P}_2\text{Dip}_2$ | 512.99              | 587.11              |
| $\text{P}_3\text{Dip}_3$ | -99.51, -132.13     | -85.50, -122.01     |
| $\text{P}_4\text{Dip}_4$ | -34.14              | -8.57               |
| $\text{TipPBr}_2$        | 151.95              | 202.41              |
| $\text{TipPCl}_2$        | 164.84              | 189.40              |
| $(\text{TipPBr})_2$ meso | 64.62               | 81.46               |
| $(\text{TipPBr})_2$ rac  | 65.47               | 124.69              |
| $(\text{TipPCl})_2$ meso | 74.93               | 87.49               |
| $(\text{TipPCl})_2$ rac  | 77.19               | 131.35              |

## 6.5 Summary of calculated data

**Table S9.** Summary of calculated data, including electronic energies. Total SCF energy in a.u.

| Structure                | PG       | NIMAG | $E_{\text{tot}}$ | $U_{298}$    | $H_{298}$   | $G^{\circ}_{298}$ |
|--------------------------|----------|-------|------------------|--------------|-------------|-------------------|
| $\text{TipPBr}_2$        | C1       | 0     | -6073.62168      | -6073.59954  | -6073.5986  | -6073.67463       |
| $(\text{TipPBr})_2$ rac  | C1       | 0     | -6999.53693      | -6999.49462  | -6999.49367 | -6999.61580       |
| $(\text{TipPBr})_2$ meso | C1       | 0     | -6999.53331      | -6999.49178  | -6999.49084 | -6999.60919       |
| $\text{Tip}_3\text{P}_3$ | C1       | 0     | -2777.71665      | -2777.65873  | -2777.65779 | -2777.80997       |
| $\text{TipPCl}_2$        | C1       | 0     | -1846.03016      | -1846.00854  | -1846.00759 | -1846.08124       |
| $(\text{TipPCl})_2$ rac  | C1       | 0     | -2771.94018      | -2771.89850  | -2771.89755 | -2772.01622       |
| $(\text{TipPCl})_2$ meso | C1       | 0     | -2771.93732      | -2771.896350 | -2771.89541 | -2772.01045       |
| $\text{Dip}_2\text{P}_2$ | $C_{2h}$ | 0     | -1616.22384      | -1616.19441  | -1616.19346 | -1616.28326       |
| $\text{Dip}_3\text{P}_3$ | C1       | 0     | -2424.36918      | -2424.32493  | -2424.32399 | -2424.44531       |
| $\text{Dip}_4\text{P}_4$ | S4       | 0     | -3232.49184      | -3232.43271  | -3232.43176 | -3232.58087       |

## 6.6 Optimized structures (.xyz-files)

### 6.6.1 PH<sub>3</sub>

```
4
PH3 @ PBE0-D3/def2-TZVP
P 0.000000000 0.0000000556 0.1248839635
H -0.0000074925 1.1905919728 -0.6488470574
H -1.0310790996 -0.5953023918 -0.6488470574
H 1.0310865921 -0.5952894143 -0.6488470574
```

### 6.6.2 TipPBr<sub>2</sub>

```
41
TipPBr2 @ PBE0-D3/def2-TZVP
C -0.8808398902 0.4991743295 0.0403738047
C -2.2508325189 0.1246810811 0.1781138993
C -3.2364413253 1.0661874662 -0.0929642063
C -2.9458207288 2.3597669568 -0.4870262107
C -1.6115007203 2.7072064095 -0.5812573112
C -0.5572238653 1.832055237 -0.323632817
H -4.2734577564 0.7644594353 0.0104621637
H -1.367998925 3.7264800089 -0.8663865312
C -2.8048689513 -1.2352447667 0.6137968657
H -3.8852588819 -1.0647339578 0.6412368351
C -2.4358734184 -1.6479194138 2.0389665413
H -3.0583236621 -2.4929648079 2.3458016169
H -1.3940741669 -1.9591412295 2.1285970863
H -2.6086553701 -0.8279323165 2.7395718627
C -2.6116657452 -2.3651317758 -0.3986764087
H -3.2413365097 -3.2146845401 -0.1201112007
H -2.8995068166 -2.0439284969 -1.4021434803
H -1.5812033866 -2.7214555302 -0.4410396887
C 0.7959647414 2.5376383663 -0.3843763811
H 0.5824471779 3.4349373302 -0.9737880309
C 1.180303473 3.0520277788 1.0062214398
H 1.3712489222 2.2378222078 1.7030175448
H 2.0856953774 3.661346397 0.94014955
H 0.3820617783 3.6715710728 1.4217901358
C 1.9634614635 1.8848583742 -1.1088810726
H 1.6780577134 1.5660415948 -2.1117166761
H 2.7609244008 2.6267988699 -1.2068085957
H 2.3830848978 1.0301047873 -0.5857850771
P 0.1699495121 -0.9779081204 0.2939083237
Br 1.0874224789 -1.3127539056 -1.7290332095
Br 1.9008713185 -0.4156822674 1.6063841482
C -4.035320075 3.3570095563 -0.789813477
C -4.8888137888 3.6410522066 0.4437314815
C -4.8994979636 2.8989468005 -1.9619542452
H -3.5431493487 4.2919466358 -1.0802168927
H -4.2768044559 3.9903406165 1.2780015751
```

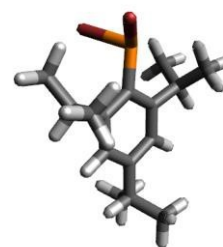

|   |               |              |               |
|---|---------------|--------------|---------------|
| H | -5.6377023282 | 4.4059909756 | 0.2236607813  |
| H | -5.4178152441 | 2.7418213341 | 0.770435394   |
| H | -4.2949444791 | 2.7155612065 | -2.8526265184 |
| H | -5.4290822067 | 1.9734331659 | -1.7208502617 |
| H | -5.6482323959 | 3.6570191476 | -2.2050574268 |

### 6.6.3 (TipPBr)<sub>2</sub> rac

80

(TipPBr)<sub>2</sub> rac @ PBE0-D3/def2-TZVP

|    |               |               |               |
|----|---------------|---------------|---------------|
| P  | -0.5155761463 | 0.9327520523  | -0.7126074483 |
| P  | 0.4491721887  | -0.0410882481 | 1.061319249   |
| Br | 0.0530155224  | 1.6754180453  | 2.474832075   |
| Br | 0.2902919506  | -0.3928454651 | -2.3527247169 |
| C  | -2.2467539236 | 0.3968965371  | -0.4566631261 |
| C  | -3.1889575129 | 1.4497565083  | -0.4921149057 |
| C  | -2.6872837711 | -0.9208968157 | -0.1836061313 |
| C  | -4.5237814056 | 1.1702036693  | -0.2167493498 |
| C  | -4.0331806158 | -1.1340380054 | 0.0683056316  |
| C  | -4.968668029  | -0.107365316  | 0.0681318081  |
| H  | -5.2442055089 | 1.9818177549  | -0.2272739167 |
| H  | -4.3666016618 | -2.1460280461 | 0.2719323912  |
| C  | 2.2233610603  | 0.0250464197  | 0.62483464    |
| C  | 2.8707531013  | -1.2299378703 | 0.7000463964  |
| C  | 2.9523448086  | 1.158505324   | 0.1981839613  |
| C  | 4.2116756806  | -1.3182519539 | 0.340440712   |
| C  | 4.2912099429  | 1.0071810825  | -0.1249611784 |
| C  | 4.9420028422  | -0.2183257394 | -0.070900211  |
| H  | 4.7051712349  | -2.2841244788 | 0.3811463543  |
| H  | 4.8456809505  | 1.8821270643  | -0.4474133164 |
| C  | -1.7941134744 | -2.1441226025 | -0.1902710535 |
| H  | -0.7631701204 | -1.8215325168 | -0.3267318805 |
| C  | -1.8468583489 | -2.9068563349 | 1.1298987961  |
| H  | -2.8407227889 | -3.3176514068 | 1.3240808055  |
| H  | -1.1445847275 | -3.7445006909 | 1.1046646823  |
| H  | -1.5769700054 | -2.2596707073 | 1.9667925591  |
| C  | -2.1327181676 | -3.0540237198 | -1.3691620012 |
| H  | -2.0544456173 | -2.5145691481 | -2.314633299  |
| H  | -1.4439790612 | -3.9024830225 | -1.4019280639 |
| H  | -3.1491232997 | -3.4477933081 | -1.2849448846 |
| C  | -2.8353205254 | 2.8934329915  | -0.7981992256 |

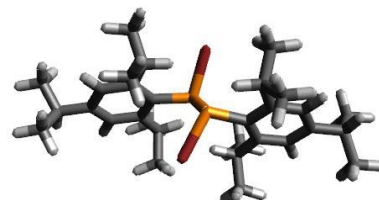

|   |               |               |               |
|---|---------------|---------------|---------------|
| H | -2.68115947   | 4.794972328   | 0.2263761351  |
| C | -3.6605531254 | 3.4487182238  | -1.9557448271 |
| H | -3.3213856173 | 4.4569229007  | -2.2066963766 |
| H | -3.5623557198 | 2.824204976   | -2.8464083778 |
| H | -4.7226874506 | 3.5128093314  | -1.7063828654 |
| C | -6.4221963307 | -0.3761535349 | 0.3679649859  |
| H | -6.9522145197 | 0.5779535935  | 0.2696761579  |

|   |               |               |               |
|---|---------------|---------------|---------------|
| C | -6.6077029844 | -0.8691725485 | 1.80105294    |
| H | -6.1046362027 | -1.8279972489 | 1.9532576513  |
| H | -6.1949258565 | -0.1588962325 | 2.5205204867  |
| H | -7.6682318113 | -1.0095344744 | 2.0254177236  |
| C | -7.0317574455 | -1.3545521747 | -0.6324940921 |
| H | -8.0982295808 | -1.4899904856 | -0.4353976955 |
| H | -6.9142851416 | -0.9973705519 | -1.6577540329 |
| H | -6.5546861637 | -2.3358884229 | -0.5638188326 |
| C | 2.3693704106  | 2.5487386605  | 0.063073253   |

#### 6.6.4 (TipPBr)<sub>2</sub> meso

80  
(TipPBr)<sub>2</sub> meso @ PBE0-D3/def2-TZVP

|    |               |               |               |
|----|---------------|---------------|---------------|
| P  | 0.9945191482  | -1.7186797789 | 0.5272317607  |
| P  | -0.9955817509 | -1.7181590792 | -0.5269624577 |
| Br | -1.9681042615 | -3.1269542931 | 0.9528680845  |
| Br | 1.9661683065  | -3.1283468107 | -0.9523488595 |
| C  | 1.8976485659  | -0.1531002313 | 0.2150979164  |
| C  | 2.706432766   | 0.2717533589  | 1.2989577771  |
| C  | 1.8776817125  | 0.6042685889  | -0.9727312124 |
| C  | 3.4281192329  | 1.4515174825  | 1.1727176893  |
| C  | 2.6234860449  | 1.7735666057  | -1.0374015756 |

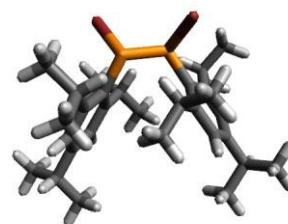

|   |               |               |               |
|---|---------------|---------------|---------------|
| C | 3.3964702676  | 2.2222354147  | 0.0212589467  |
| H | 4.0403978178  | 1.7883545852  | 2.0007078723  |
| H | 2.6030997271  | 2.3501396948  | -1.9555155095 |
| C | -1.8979448592 | -0.1520920087 | -0.2150440935 |
| C | -2.7066240026 | 0.2729089133  | -1.2989191121 |
| C | -1.8778327779 | 0.6052850576  | 0.9727734589  |
| C | -3.4281734234 | 1.4527541164  | -1.172657942  |
| C | -2.6235574871 | 1.7746286647  | 1.0374889214  |
| C | -3.3965230728 | 2.2233922306  | -0.0211451312 |
| H | -4.0403833377 | 1.7896827176  | -2.0006616216 |
| H | -2.6030878482 | 2.3511735906  | 1.955618939   |
| C | 1.1413745838  | 0.1961070312  | -2.2270226483 |
| H | 0.511488965   | -0.6711592642 | -1.99676269   |
| C | 0.2369252721  | 1.3026981727  | -2.758456284  |
| H | 0.8196877259  | 2.1581289734  | -3.108712328  |
| H | -0.3386183912 | 0.9345779003  | -3.6103737863 |
| H | -0.460786121  | 1.6545781412  | -1.9974195863 |
| C | 2.1288408909  | -0.2505665987 | -3.3050360401 |
| H | 2.7681638715  | -1.0572260039 | -2.9461139297 |
| H | 1.5907484959  | -0.6055127412 | -4.1877305761 |
| H | 2.7672668165  | 0.5832623326  | -3.6103175759 |
| C | 2.8677504557  | -0.542560583  | 2.5712570141  |
| H | 1.9063441277  | -1.0166068628 | 2.7889584648  |
| C | 3.2561106108  | 0.278141479   | 3.7952209045  |
| H | 4.2909317976  | 0.6269077888  | 3.7416274099  |

|   |               |               |               |
|---|---------------|---------------|---------------|
| H | 4.80286579    | 3.2868301949  | -2.1501531809 |
| C | -1.1412681744 | 0.1972366466  | 2.226959058   |
| H | -0.5117258501 | -0.6702900153 | 1.9967329149  |
| C | -2.8680506713 | -0.5413337551 | -2.571255487  |
| H | -1.9068204318 | -1.0158141775 | -2.7887734412 |
| C | -4.1889590401 | 3.5030811505  | 0.0767943626  |
| H | -4.69820546   | 3.6398720136  | -0.8837775348 |
| C | -3.2784833591 | 4.707843795   | 0.2995892567  |
| H | -2.5271796418 | 4.7876060436  | -0.4890485664 |
| H | -3.8609637824 | 5.6325562542  | 0.3142227009  |
| H | -2.7522266769 | 4.6307358312  | 1.2547809496  |
| C | -5.2571515203 | 3.4135644325  | 1.1639766918  |
| H | -5.8584694318 | 4.3259833117  | 1.1881945658  |

|   |               |               |               |
|---|---------------|---------------|---------------|
| H | -5.9249825413 | 2.5663116063  | 0.9945681449  |
| H | -4.8026850271 | 3.2880300214  | 2.1504007214  |
| C | -2.1284321295 | -0.2488345442 | 3.3054869778  |
| H | -2.7664522291 | 0.5852631863  | 3.6108844515  |
| H | -2.7681763338 | -1.0553570291 | 2.9470053352  |
| H | -1.5900934361 | -0.6037779769 | 4.1880317224  |
| C | -0.2363039621 | 1.3037639414  | 2.757655865   |
| H | 0.4612727235  | 1.6551128433  | 1.9962575624  |
| H | -0.818711451  | 2.1595156375  | 3.1077226615  |
| H | 0.3394129018  | 0.9358323198  | 3.609540925   |
| C | -3.8898558493 | -1.6581294696 | -2.3494313276 |
| H | -3.6028487754 | -2.3175341321 | -1.5280759852 |
| H | -4.8682038561 | -1.2319392318 | -2.1096891435 |
| H | -3.9930602518 | -2.2664289807 | -3.2517348899 |
| C | -3.2557967017 | 0.2795771925  | -3.7952794729 |
| H | -4.2905051533 | 0.6287154159  | -3.741936401  |
| H | -2.6110795667 | 1.1508283794  | -3.9258927939 |
| H | -3.1751468068 | -0.3417120233 | -4.6900367151 |

### 6.6.5 TipPCl<sub>2</sub>

41

TipPCl<sub>2</sub> @ PBE0-D3/def2-TZVP

|   |               |               |               |
|---|---------------|---------------|---------------|
| C | -0.8839618759 | 0.4922501601  | 0.053752693   |
| C | -2.2539190096 | 0.1127800043  | 0.1611495754  |
| C | -3.2379018964 | 1.0583862391  | -0.0999874439 |
| C | -2.9438712682 | 2.3624278332  | -0.4565418261 |
| C | -1.6092359951 | 2.7056059418  | -0.5540584648 |
| C | -0.556649099  | 1.8223655342  | -0.3142474483 |
| H | -4.2759326003 | 0.7536734183  | -0.0174515215 |
| H | -1.3628282001 | 3.7264711455  | -0.8316386404 |
| C | -2.8089615249 | -1.2608088704 | 0.548021814   |
| H | -3.8914865316 | -1.120547564  | 0.4726296368  |
| C | -2.562152912  | -1.6544597563 | 2.0050675147  |
| H | -3.1770448198 | -2.5226527632 | 2.2580249006  |
| H | -1.5213703789 | -1.9212882759 | 2.1932896232  |
| H | -2.8338886732 | -0.8392284039 | 2.67944639    |
| C | -2.4924241063 | -2.3932544913 | -0.4298318404 |
| H | -3.1541813792 | -3.2404821342 | -0.2293662146 |
| H | -2.6511365287 | -2.0762003077 | -1.4628392186 |
| H | -1.467087833  | -2.7553145871 | -0.340481906  |
| C | 0.8004584526  | 2.5157428916  | -0.4314128895 |
| H | 0.5790915067  | 3.3770369408  | -1.0699750696 |
| C | 1.2183212585  | 3.1124189211  | 0.9156815542  |
| H | 1.4281883026  | 2.341733303   | 1.6550106459  |
| H | 2.1207038987  | 3.7168556351  | 0.7896836543  |
| H | 0.4304897797  | 3.756399104   | 1.3135049615  |
| C | 1.9513711737  | 1.8147660209  | -1.1387622612 |
| H | 1.635193052   | 1.399543145   | -2.0961160678 |
| H | 2.7309935576  | 2.5559665083  | -1.335562136  |
| H | 2.4049397285  | 1.0185445886  | -0.5554504235 |
| P | 0.1892699504  | -0.9434666324 | 0.4224482995  |

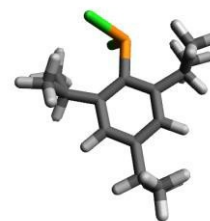

|    |               |               |               |
|----|---------------|---------------|---------------|
| Cl | 1.1094401396  | -1.3232843792 | -1.3938658806 |
| Cl | 1.7416675845  | -0.2344596994 | 1.5866299765  |
| C  | -4.0313918465 | 3.3704561424  | -0.7299581715 |
| C  | -4.8849570243 | 3.6172452176  | 0.5115517192  |
| C  | -4.8957895327 | 2.9506474749  | -1.9162100217 |
| H  | -3.5372074735 | 4.3129630347  | -0.9910756028 |
| H  | -4.2725223025 | 3.9401736766  | 1.3560549235  |
| H  | -5.6333776222 | 4.3890152954  | 0.3149376202  |
| H  | -5.4141807044 | 2.7085276277  | 0.8105104198  |
| H  | -4.2911211087 | 2.7946776511  | -2.8120625887 |
| H  | -5.4267657029 | 2.0186883773  | -1.7047025088 |
| H  | -5.6435321052 | 3.7168842525  | -2.135722446  |

### 6.6.6 (TipPCl)<sub>2</sub> rac

|                                              |               |               |               |
|----------------------------------------------|---------------|---------------|---------------|
| 80                                           |               |               |               |
| (TipPCl) <sub>2</sub> rac @ PBE-D3/def2-TZVP |               |               |               |
| P                                            | -0.5691041791 | -0.7802030392 | 0.8020033357  |
| P                                            | 0.4126379575  | 0.0834694499  | -1.0281479953 |
| C                                            | -2.2919227262 | -0.2412236698 | 0.5022143501  |
| C                                            | -3.2471437465 | -1.2815972022 | 0.5373243687  |
| C                                            | -2.7092014444 | 1.07666668    | 0.199080514   |
| C                                            | -4.5726351277 | -0.9897790271 | 0.2310188788  |
| C                                            | -4.0487977037 | 1.3057006125  | -0.071960218  |
| C                                            | -4.9965419801 | 0.2903642281  | -0.0758133453 |
| H                                            | -5.3035800009 | -1.7915907953 | 0.2369297465  |
| H                                            | -4.3657878664 | 2.3197509011  | -0.2910731618 |
| C                                            | 2.1755977322  | 0.0992067772  | -0.5391769736 |
| C                                            | 2.7891314844  | 1.3679696914  | -0.6407953902 |
| C                                            | 2.9368410009  | -1.0068361648 | -0.098610599  |
| C                                            | 4.1395994096  | 1.4914097292  | -0.3318505487 |
| C                                            | 4.2837666029  | -0.8227608512 | 0.1725025421  |
| C                                            | 4.909365921   | 0.4121394486  | 0.0627173367  |
| H                                            | 4.6087705446  | 2.46788852    | -0.4001347848 |
| H                                            | 4.8660855264  | -1.6789786371 | 0.4963708416  |
| C                                            | -1.7922059422 | 2.282857048   | 0.188579181   |
| H                                            | -0.7663864778 | 1.94045753    | 0.3171501453  |
| C                                            | -1.843247977  | 3.0375225257  | -1.1358708001 |
| H                                            | -2.8319006696 | 3.4613735977  | -1.3269750962 |
| H                                            | -1.129732972  | 3.8658644503  | -1.119651296  |
| H                                            | -1.5875492772 | 2.3808657342  | -1.9699436404 |
| C                                            | -2.1013976196 | 3.2063601778  | 1.3649435578  |
| H                                            | -2.0185920585 | 2.6728538699  | 2.313321953   |
| H                                            | -1.4007919459 | 4.0453278851  | 1.3813681899  |
| H                                            | -3.1135983657 | 3.6130657369  | 1.2908735902  |
| C                                            | -2.9066116053 | -2.7241717365 | 0.8624811156  |
| H                                            | -1.9012781695 | -2.7438012914 | 1.2910293147  |
| C                                            | -2.8740350195 | -3.5693805976 | -0.4082758472 |
| H                                            | -3.8494390578 | -3.5648046982 | -0.9030669078 |
| H                                            | -2.136862888  | -3.186868717  | -1.1175990351 |
| H                                            | -2.6182884873 | -4.6060345665 | -0.1732855799 |
| C                                            | -3.844662349  | -3.325808659  | 1.9048205714  |

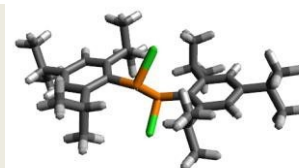

|    |               |               |               |
|----|---------------|---------------|---------------|
| H  | -3.4856622575 | -4.3151284234 | 2.1991986972  |
| H  | -3.8965569213 | -2.7017356684 | 2.799605189   |
| H  | -4.86051258   | -3.4509623896 | 1.5217899592  |
| C  | -6.4428261144 | 0.5739261973  | -0.3975450949 |
| H  | -6.9774381208 | -0.3808832231 | -0.3396711196 |
| C  | -6.6018346575 | 1.1144138428  | -1.8163267598 |
| H  | -6.0963152548 | 2.0772841086  | -1.9279536597 |
| H  | -6.1764335935 | 0.4279385214  | -2.5513471466 |
| H  | -7.6580319385 | 1.2631973846  | -2.0549926062 |
| C  | -7.0663826511 | 1.5211460108  | 0.6244199778  |
| H  | -8.1270804109 | 1.6744548601  | 0.4096502447  |
| H  | -6.9747264682 | 1.1255988084  | 1.6381856478  |
| H  | -6.5779494259 | 2.4989947872  | 0.6023556177  |
| C  | 2.3780457367  | -2.3969455435 | 0.1226617423  |
| H  | 1.3083791319  | -2.3810850975 | -0.0739078725 |
| C  | 2.0470960452  | 2.6353432762  | -1.0218955573 |
| H  | 1.0364156379  | 2.3582137711  | -1.3323808095 |
| C  | 6.3751125824  | 0.5753073462  | 0.379293578   |
| H  | 6.6258689516  | 1.6280626446  | 0.2064407375  |
| C  | 7.2443696396  | -0.2702313866 | -0.5477612195 |
| H  | 7.0533810064  | -0.0319017727 | -1.5962307945 |
| H  | 8.3043039553  | -0.0985039047 | -0.3433101249 |
| H  | 7.0470590998  | -1.3362310579 | -0.4066425671 |
| C  | 6.6664465317  | 0.2594989419  | 1.8442881998  |
| H  | 7.7215481161  | 0.4309737901  | 2.0725848799  |
| H  | 6.0648997526  | 0.8813637558  | 2.5105906787  |
| H  | 6.4419047759  | -0.7860266315 | 2.0716529755  |
| C  | 2.5445795745  | -2.8335887356 | 1.5765786326  |
| H  | 3.5971563489  | -2.9398841648 | 1.8516112315  |
| H  | 2.0896041862  | -2.1111976266 | 2.2576725492  |
| H  | 2.0607306968  | -3.8011826029 | 1.7332522718  |
| C  | 2.9989873374  | -3.4072417375 | -0.8378244306 |
| H  | 2.8342802855  | -3.1120183381 | -1.8757007783 |
| H  | 4.0768006609  | -3.498718611  | -0.6781778695 |
| H  | 2.5538709469  | -4.3944426019 | -0.6890172307 |
| C  | 1.9104184093  | 3.5615079914  | 0.1844683328  |
| H  | 1.4123367151  | 3.0566830444  | 1.0153980187  |
| H  | 2.8892885386  | 3.8966733475  | 0.5378675408  |
| H  | 1.3276865237  | 4.4483037863  | -0.0797958195 |
| C  | 2.6885614741  | 3.3517046411  | -2.2058705155 |
| H  | 3.6924386332  | 3.7127726115  | -1.9686290697 |
| H  | 2.7656341182  | 2.6906020684  | -3.0718020941 |
| H  | 2.0866222739  | 4.2184309891  | -2.4908806632 |
| Cl | 0.15865276    | 0.5322090078  | 2.2460871155  |
| Cl | 0.1735793355  | -1.6137409475 | -2.2127384279 |

## 6.6.7 (TipPCI)<sub>2</sub> meso

80

(TipPCI)<sub>2</sub> meso @ PBE-D3/def2-TZVP

|   |               |               |               |
|---|---------------|---------------|---------------|
| P | -1.0518447312 | -1.7679635946 | -0.4014608403 |
| P | 1.0534608527  | -1.7677914184 | 0.3994761005  |

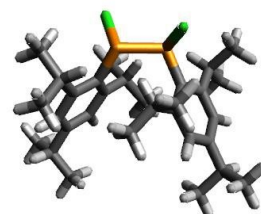

|   |               |               |               |
|---|---------------|---------------|---------------|
| C | -1.8935806793 | -0.1731507467 | -0.072649464  |
| C | -2.7881982992 | 0.240327285   | -1.0896788856 |
| C | -1.7488770158 | 0.6116563887  | 1.0876230619  |
| C | -3.4686232491 | 1.4412941398  | -0.9334452956 |
| C | -2.4568467875 | 1.8021626087  | 1.1850314759  |
| C | -3.3087918838 | 2.2436491802  | 0.1854861611  |
| H | -4.1451011017 | 1.7741303419  | -1.711621994  |
| H | -2.3403657658 | 2.4043332876  | 2.0791659832  |
| C | 1.8944978722  | -0.1723670126 | 0.0718321556  |
| C | 2.7889941587  | 0.2406772515  | 1.0891386514  |
| C | 1.749352898   | 0.6133371646  | -1.0877812582 |
| C | 3.468845444   | 1.4420953969  | 0.9338582426  |
| C | 2.4567737889  | 1.8042436865  | -1.184257859  |
| C | 3.3085739539  | 2.2453009879  | -0.1844004821 |
| H | 4.1452327146  | 1.7745985688  | 1.7122530438  |
| H | 2.339928735   | 2.4071125057  | -2.0778767417 |
| C | -0.9141490001 | 0.211535834   | 2.2815427308  |
| H | -0.305205553  | -0.6581478139 | 2.0075850459  |
| C | 0.0290860516  | 1.3207621329  | 2.7332512834  |
| H | -0.5230017569 | 2.1685376368  | 3.1458216361  |
| H | 0.685261301   | 0.9501012338  | 3.5234373704  |
| H | 0.6489081259  | 1.6834101211  | 1.9126826514  |
| C | -1.8140313407 | -0.2257817959 | 3.4376694379  |
| H | -2.4792030092 | -1.0356018276 | 3.1380579685  |
| H | -1.2083300565 | -0.5708593432 | 4.2795109664  |
| H | -2.4269366815 | 0.6118438194  | 3.7826238062  |
| C | -3.0755589203 | -0.6063329893 | -2.317670528  |
| H | -2.1399652346 | -1.0887002702 | -2.6162465752 |
| C | -3.5822562042 | 0.1813565741  | -3.5198423348 |
| H | -4.6039933896 | 0.5406492994  | -3.370648805  |
| H | -2.9506699726 | 1.0429573117  | -3.74514622   |
| H | -3.5980347717 | -0.4673731842 | -4.3985384023 |
| C | -4.0712371611 | -1.7132817785 | -1.9672277496 |
| H | -4.2643457435 | -2.3439435379 | -2.83887397   |
| H | -3.7029875748 | -2.3519112565 | -1.1619392006 |
| H | -5.0203825488 | -1.2781342969 | -1.6417730402 |
| C | -4.0349039388 | 3.5605991128  | 0.304068506   |
| H | -4.6700054894 | 3.6592565014  | -0.5834618475 |
| C | -3.0503590841 | 4.7281022452  | 0.3073460446  |
| H | -2.3953864843 | 4.6825598087  | 1.18162005    |
| H | -2.4179958364 | 4.7144261849  | -0.5830619075 |
| H | -3.5827962155 | 5.6822453652  | 0.3370194045  |

|   |              |               |               |
|---|--------------|---------------|---------------|
| C | 3.0768212408 | -0.6069071669 | 2.3163918796  |
| H | 2.1415242294 | -1.0901785459 | 2.6144420284  |
| C | 4.0340685239 | 3.5626856042  | -0.3019377499 |
| H | 4.6691842658 | 3.660896226   | 0.5856321786  |
| C | 3.0489797284 | 4.7297337347  | -0.3041749181 |

|    |               |               |               |
|----|---------------|---------------|---------------|
| H  | 2.4166779133  | 4.7150163361  | 0.5862599312  |
| H  | 3.5809676964  | 5.684151145   | -0.3330817474 |
| H  | 2.3939740193  | 4.6846168889  | -1.178445844  |
| C  | 4.9387087433  | 3.6053371026  | -1.5302744461 |
| H  | 5.4965041222  | 4.5446615163  | -1.5629640105 |
| H  | 5.6548025679  | 2.7809224711  | -1.5236584717 |
| H  | 4.355917528   | 3.5342723443  | -2.4524753516 |
| C  | 1.8145419114  | -0.2223529012 | -3.4384301438 |
| H  | 2.4272565893  | 0.6156537466  | -3.782798586  |
| H  | 2.4798963236  | -1.0322561977 | -3.1394515119 |
| H  | 1.2088680878  | -0.5669362286 | -4.2804938908 |
| C  | -0.0288075654 | 1.3233214646  | -2.7327757601 |
| H  | -0.6486584019 | 1.6852534375  | -1.9119142164 |
| H  | 0.5231257937  | 2.1714996735  | -3.1447288373 |
| H  | -0.6849477759 | 0.9531420049  | -3.5232159384 |
| C  | 4.0732868288  | -1.7128648456 | 1.9650522091  |
| H  | 3.7055566333  | -2.3510232581 | 1.1591562694  |
| H  | 5.0221674051  | -1.2767783651 | 1.6400828215  |
| H  | 4.266738078   | -2.3441783222 | 2.8361504864  |
| C  | 3.5828624486  | 0.1800090267  | 3.5193430904  |
| H  | 4.6043718818  | 0.5401269422  | 3.3705844908  |
| H  | 2.9506695442  | 1.0409722795  | 3.7453830029  |
| H  | 3.5989899438  | -0.4695242468 | 4.3974391115  |
| Cl | 1.8244632847  | -2.9642378371 | -1.129804212  |
| Cl | -1.8222936441 | -2.9657744178 | 1.1270263142  |

## 6.6.8 Tip<sub>3</sub>P<sub>3</sub>

117

Tip3P3 @ PBE-D3/def2-TZVP

|   |          |          |          |
|---|----------|----------|----------|
| C | -3.26876 | -3.53531 | -1.67966 |
| C | 3.62679  | -3.04758 | -0.62531 |
| C | -0.27791 | -4.43905 | 1.20729  |
| C | 2.79382  | -3.48947 | 0.39213  |
| C | 1.52207  | -4.10233 | 2.91597  |
| C | -2.96808 | -1.60097 | -3.25157 |
| C | 3.2133   | -1.95591 | -1.36723 |
| C | 0.72961  | -3.45045 | 1.7898   |
| C | 1.58894  | -2.86905 | 0.68046  |
| C | -2.86741 | -2.0722  | -1.80042 |
| C | 0.87588  | -0.70107 | -3.2559  |
| C | 2.01374  | -1.29241 | -1.12618 |
| C | 1.18297  | -1.7448  | -0.08494 |
| C | -4.97263 | -1.43525 | -0.61483 |
| C | -3.64944 | -1.13369 | -0.90651 |
| C | 1.63656  | -0.1614  | -2.04915 |
| C | 2.81671  | 0.69424  | -2.48754 |
| C | -5.7922  | -0.57321 | 0.09832  |
| C | 3.55361  | -0.56795 | 2.49996  |
| C | -3.10472 | 0.08135  | -0.43464 |
| C | -5.2593  | 0.64226  | 0.49256  |
| C | 2.27823  | 0.25748  | 2.42504  |

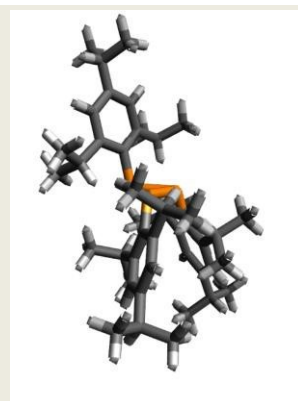

|   |          |          |          |
|---|----------|----------|----------|
| C | -3.94138 | 0.99671  | 0.22845  |
| C | 2.31198  | 1.34571  | 1.3745   |
| C | 1.94285  | 0.86905  | 3.78539  |
| C | 1.14583  | 1.79054  | 0.7173   |
| C | 3.51447  | 1.99804  | 1.12867  |
| C | -3.50826 | 2.39277  | 0.61428  |
| C | 0.08544  | 3.62173  | -2.24858 |
| C | 3.60784  | 3.09393  | 0.28603  |
| C | -4.22356 | 3.43226  | -0.24473 |
| C | 1.21197  | 2.93943  | -0.09655 |
| C | 2.44046  | 3.55323  | -0.3017  |
| C | 0.00213  | 3.59308  | -0.727   |
| C | -3.68742 | 2.67391  | 2.10078  |
| C | -0.22753 | 4.98758  | -0.15203 |
| H | 0.24254  | -5.26971 | 0.72268  |
| H | -2.55887 | -4.15833 | -2.22864 |
| H | 1.98864  | -5.03968 | 2.60244  |
| H | 3.10005  | -4.33876 | 0.9905   |
| H | -4.25794 | -3.72675 | -2.10338 |
| H | -3.27491 | -3.86354 | -0.63813 |
| H | -2.37295 | -2.24133 | -3.90814 |
| H | -0.91901 | -4.84627 | 1.99347  |
| H | -0.91601 | -3.9584  | 0.46349  |
| H | 0.85052  | -4.34144 | 3.74358  |
| H | -4.00691 | -1.63245 | -3.59129 |
| H | 3.85547  | -1.6038  | -2.16665 |
| H | 2.30615  | -3.44381 | 3.29445  |
| H | 1.51777  | -1.35692 | -3.85108 |
| H | -5.38923 | -2.37526 | -0.95869 |
| H | -1.81481 | -2.01178 | -1.51169 |
| H | -0.00125 | -1.27302 | -2.94904 |
| H | -2.60902 | -0.57529 | -3.36181 |
| H | 0.16023  | -2.6307  | 2.23956  |
| H | 0.53678  | 0.11903  | -3.89463 |
| H | 3.46863  | 0.17048  | -3.19122 |
| H | 3.82758  | -0.96364 | 1.5208   |
| H | 3.40611  | -1.41265 | 3.17599  |
| H | 0.9662   | 0.49895  | -1.49994 |
| H | 3.41004  | 1.0113   | -1.62922 |
| H | 2.45346  | 1.59168  | -2.99252 |
| H | 4.39453  | 0.0095   | 2.89233  |
| H | 1.46908  | -0.42899 | 2.16825  |
| H | 1.87139  | 0.09008  | 4.54914  |
| H | -5.8903  | 1.35164  | 1.01849  |
| H | 0.18053  | 2.61157  | -2.65118 |
| H | 4.41499  | 1.6467   | 1.61921  |
| H | -4.04996 | 3.24889  | -1.30762 |
| H | 2.71929  | 1.57646  | 4.08933  |
| H | 0.99118  | 1.40441  | 3.75601  |
| H | -5.30333 | 3.41181  | -0.07558 |
| H | -2.44453 | 2.48263  | 0.40311  |
| H | -0.87125 | 2.99532  | -0.47331 |
| H | 0.94046  | 4.20885  | -2.59391 |

|   |          |          |          |
|---|----------|----------|----------|
| H | -0.81842 | 4.06907  | -2.67002 |
| H | 2.47962  | 4.42862  | -0.94191 |
| H | -3.1357  | 1.94767  | 2.70035  |
| H | -3.86441 | 4.43697  | -0.00604 |
| H | -4.73909 | 2.63238  | 2.39517  |
| H | -3.31421 | 3.67179  | 2.3454   |
| H | -1.14567 | 5.41942  | -0.55914 |
| H | -0.31846 | 4.95254  | 0.93592  |
| H | 0.59661  | 5.66269  | -0.39619 |
| P | -0.46433 | -1.1124  | 0.44292  |
| P | -1.33483 | 0.44806  | -0.82822 |
| P | -0.45873 | 0.98414  | 1.14445  |
| C | -7.21909 | -0.94579 | 0.41399  |
| C | -8.20977 | 0.03015  | -0.2131  |
| C | -7.44081 | -1.05999 | 1.91918  |
| H | -7.39613 | -1.93306 | -0.02742 |
| H | -8.06875 | 0.09606  | -1.29392 |
| H | -9.23819 | -0.28507 | -0.0186  |
| H | -8.08627 | 1.03438  | 0.20093  |
| H | -6.75153 | -1.77947 | 2.36584  |
| H | -7.28047 | -0.09664 | 2.41071  |
| H | -8.46288 | -1.38072 | 2.13699  |
| C | 4.93262  | 3.76878  | 0.03433  |
| C | 4.92459  | 5.2168   | 0.5147   |
| C | 5.33204  | 3.68222  | -1.43574 |
| H | 5.68356  | 3.22549  | 0.61883  |
| H | 4.6596   | 5.28067  | 1.57213  |
| H | 5.90733  | 5.67547  | 0.37814  |
| H | 4.19932  | 5.81157  | -0.04696 |
| H | 5.37224  | 2.64522  | -1.7752  |
| H | 4.61298  | 4.21028  | -2.06772 |
| H | 6.31387  | 4.13476  | -1.5972  |
| C | 4.95532  | -3.70779 | -0.89282 |
| C | 4.80649  | -5.19501 | -1.19447 |
| C | 5.91961  | -3.47651 | 0.26779  |
| H | 5.37855  | -3.22577 | -1.7812  |
| H | 4.12599  | -5.36253 | -2.03183 |
| H | 5.77506  | -5.6346  | -1.44549 |
| H | 4.41242  | -5.73579 | -0.33015 |
| H | 6.05429  | -2.41027 | 0.46171  |
| H | 5.54196  | -3.93614 | 1.1851   |
| H | 6.89807  | -3.91331 | 0.05158  |

### 6.6.9 Dip<sub>2</sub>P<sub>2</sub>

60  
Dip2P2 @ PBE-D3/def2-TZVP

|   |              |              |               |
|---|--------------|--------------|---------------|
| P | 3.3167993861 | 4.673508082  | 11.2731673116 |
| C | 3.0692915899 | 4.0225625421 | 12.9769962096 |
| C | 3.7161789801 | 2.8391211467 | 13.3673539172 |
| C | 3.5427518914 | 2.3813765398 | 14.6686617182 |

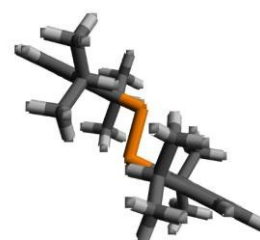

|   |              |              |               |
|---|--------------|--------------|---------------|
| H | 4.0246546649 | 1.4621158355 | 14.9826109881 |
| C | 2.7607062416 | 3.0821259802 | 15.5703572441 |
| H | 2.6321130586 | 2.7095894931 | 16.5805682964 |
| C | 2.1513200719 | 4.2638253094 | 15.1857336928 |
| H | 1.5492305958 | 4.8111278243 | 15.902519234  |
| C | 2.2993215348 | 4.7559576189 | 13.8938715469 |
| C | 4.5618386479 | 2.0486902528 | 12.3931642638 |
| H | 4.772362743  | 2.704131015  | 11.5373739895 |
| C | 3.7896866056 | 0.8462528309 | 11.8598759624 |
| H | 3.5292541852 | 0.1655811704 | 12.6751640313 |
| H | 4.3880800939 | 0.2925609547 | 11.1309747379 |
| H | 2.8592484238 | 1.1587647462 | 11.3797137945 |
| C | 5.9076385432 | 1.6301193627 | 12.9738006292 |
| H | 6.4530660748 | 2.4888987933 | 13.370602106  |
| H | 6.5215945369 | 1.1617726126 | 12.2003595344 |
| H | 5.7912107666 | 0.9026278106 | 13.7810403695 |
| C | 1.610785958  | 6.0411008598 | 13.4897894181 |
| H | 2.0627227022 | 6.3700920747 | 12.5443730909 |
| C | 0.1293367331 | 5.7982598488 | 13.2199440588 |

|   |              |              |              |
|---|--------------|--------------|--------------|
| H | 3.7705769317 | 1.5051991113 | 6.1495104826 |
| H | 3.6919042835 | 0.3644491773 | 7.4880463425 |
| H | 2.2115061488 | 1.1326878456 | 6.8933514329 |

#### 6.6.10 $\text{Dip}_3\text{P}_3$

90

Dip2P2 @ PBE-D3/def2-TZVP

|   |               |               |               |
|---|---------------|---------------|---------------|
| C | 2.3850000625  | -4.2381961757 | 1.1168250955  |
| C | -4.2149501688 | -2.2802313504 | 1.3160130658  |
| C | -1.1594444225 | -4.380374688  | -1.223436774  |
| C | -3.7116809348 | -2.842244113  | 0.1587756573  |
| C | -3.0748037481 | -3.5229925336 | -2.596655208  |
| C | 2.8019458234  | -2.3787045566 | 2.7531680729  |
| C | -3.4855079846 | -1.3113409762 | 1.9752255402  |
| C | -1.9769363153 | -3.1483009725 | -1.6075245701 |
| C | -2.4820783093 | -2.450701895  | -0.3551215562 |
| C | 2.3644953354  | -2.7298950862 | 1.3299327736  |
| C | -0.6811060633 | -0.5917123859 | 3.4166018579  |
| C | -2.2460893888 | -0.8836265566 | 1.5067318463  |
| C | -1.7305221402 | -1.4579702652 | 0.3265396077  |
| C | 4.3680892085  | -2.5168461315 | -0.1482961181 |
| C | 3.1966535917  | -1.9476593452 | 0.3339073488  |
| C | -1.4912134909 | 0.1240419339  | 2.339255051   |
| C | -2.375015289  | 1.204538071   | 2.9504061316  |
| C | 5.2314487624  | -1.8067522029 | -0.9640798052 |
| C | -4.1740357766 | 0.331544345   | -1.747950824  |
| C | 2.8719890432  | -0.6238658881 | -0.0491069763 |
| C | 4.9430117616  | -0.4955623522 | -1.2795219951 |
| C | -2.7649947263 | 0.8737625302  | -1.9456659174 |
| C | 3.7802311855  | 0.1212131436  | -0.823468987  |
| C | -2.3607921962 | 1.9122998645  | -0.9205014184 |
| C | -2.5926091222 | 1.4473966778  | -3.3529514145 |
| C | -1.0280609178 | 2.0587581815  | -0.4728490198 |
| C | -3.3197923643 | 2.819869756   | -0.4847883709 |
| C | 3.6061245322  | 1.5916603533  | -1.1344911675 |
| C | 0.9142142239  | 3.490933839   | 2.2614830191  |
| C | -2.9904327189 | 3.8732575558  | 0.3477630029  |
| C | 4.6278776813  | 2.4266112197  | -0.3651668696 |
| C | -0.6792608204 | 3.1629590597  | 0.3318581617  |
| C | -1.6777376847 | 4.0434992182  | 0.7374933943  |

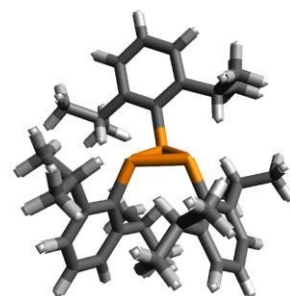

|   |              |               |              |
|---|--------------|---------------|--------------|
| H | -4.29053116  | -3.5970494677 | -0.358345896 |
| H | 3.3524804126 | -4.6770235357 | 1.374051521  |
| H | 2.1572020689 | -4.498997812  | 0.0810572303 |
| H | 2.1830334713 | -2.9014260935 | 3.48757298   |

|   |               |               |               |
|---|---------------|---------------|---------------|
| H | -0.7686545838 | -4.8788015074 | -2.1145246368 |
| H | -0.3145611311 | -4.1117819308 | -0.5857666774 |
| H | -2.6230631391 | -3.8677635086 | -3.5296663749 |
| H | 3.8437480284  | -2.6695177023 | 2.9137698785  |
| H | -3.8859832409 | -0.8743297813 | 2.8815829754  |
| H | -3.7200870463 | -2.6727652685 | -2.8258242017 |
| H | -1.3462535695 | -1.107466746  | 4.1153122608  |
| H | 4.6178730666  | -3.5346591221 | 0.1246387035  |
| H | 1.3230273476  | -2.4157281514 | 1.2234255303  |
| H | -0.0071271455 | -1.3321147499 | 2.9816253681  |
| H | 2.7191131171  | -1.3058287744 | 2.9418657369  |
| H | -1.3054310933 | -2.4611216937 | -2.1314613516 |
| H | -0.0770832191 | 0.1229951838  | 3.9823845207  |
| H | -3.005606675  | 0.8181360056  | 3.7551551556  |
| H | -4.3208514913 | -0.0319797816 | -0.7292388312 |
| H | -4.3478381357 | -0.5014495342 | -2.4322019579 |
| H | 6.1388167251  | -2.271847133  | -1.3331346923 |
| H | -0.7914005465 | 0.6389221978  | 1.6819287805  |
| H | -3.0148485139 | 1.6655371819  | 2.1963987922  |
| H | -1.7485260352 | 1.9883706318  | 3.3817363683  |
| H | -4.9374914583 | 1.0833557758  | -1.9638221453 |
| H | -2.0830476281 | 0.0259411763  | -1.8540239053 |
| H | -2.8378372858 | 0.6944120681  | -4.1068899736 |
| H | 5.6386799405  | 0.0724985478  | -1.8871591558 |
| H | 0.6475030297  | 2.5203337774  | 2.685026824   |
| H | -4.3455470983 | 2.7057573551  | -0.8119714169 |
| H | 4.5545559826  | 2.2446008763  | 0.709760868   |
| H | -3.2534205327 | 2.3063119505  | -3.499677722  |
| H | -1.5658125331 | 1.7786525683  | -3.5247699397 |
| H | 5.6489155633  | 2.1881838078  | -0.6745961168 |
| H | 2.6204834952  | 1.8941136729  | -0.7860313593 |
| H | -3.7546364166 | 4.5677071485  | 0.6785155931  |
| H | 1.3903692442  | 2.7108133327  | 0.3572814209  |

## 6.6.11 Dip<sub>4</sub>P<sub>4</sub>

120

Dip<sub>4</sub>P<sub>4</sub> @ PBE-D3/def2-TZVP

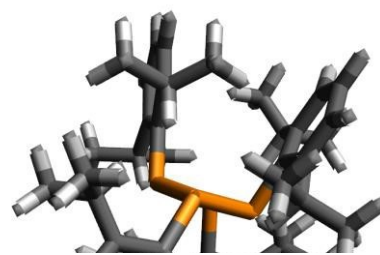

|   |               |               |               |
|---|---------------|---------------|---------------|
| P | -0.0011352224 | 1.581292459   | 0.0411386556  |
| P | -1.581292459  | -0.0011352224 | -0.0411386556 |
| P | 0.0011352224  | -1.581292459  | 0.0411386556  |
| P | 1.581292459   | 0.0011352224  | -0.0411386556 |
| C | 0.3595196891  | -2.1367641775 | 1.782700238   |
| C | 1.6303031269  | -2.7477761535 | 1.9320487318  |
| C | -0.5160692416 | -2.1065039671 | 2.886909985   |
| C | 2.026283395   | -3.2106541854 | 3.1788357588  |
| C | -0.0638730845 | -2.578518921  | 4.1188581502  |
| C | 1.1974430873  | -3.1100923499 | 4.2799361191  |
| H | 3.0019675913  | -3.6701985541 | 3.2860985466  |
| H | -0.7328502846 | -2.5322864913 | 4.9707206761  |
| H | 1.5255505889  | -3.4653446977 | 5.2501962263  |
| C | 2.1367641775  | 0.3595196891  | -1.782700238  |
| C | 2.7477761535  | 1.6303031269  | -1.9320487318 |
| C | 2.1065039671  | -0.5160692416 | -2.886909985  |
| C | 3.2106541854  | 2.026283395   | -3.1788357588 |
| C | 2.578518921   | -0.0638730845 | -4.1188581502 |
| C | 3.1100923499  | 1.1974430873  | -4.2799361191 |
| H | 3.6701985541  | 3.0019675913  | -3.2860985466 |
| H | 2.5322864913  | -0.7328502846 | -4.9707206761 |
| H | 3.4653446977  | 1.5255505889  | -5.2501962263 |
| C | -2.1367641775 | -0.3595196891 | -1.782700238  |
| C | -2.1065039671 | 0.5160692416  | -2.886909985  |
| C | -2.7477761535 | -1.6303031269 | -1.9320487318 |
| C | -2.578518921  | 0.0638730845  | -4.1188581502 |
| C | -3.2106541854 | -2.026283395  | -3.1788357588 |
| C | -3.1100923499 | -1.1974430873 | -4.2799361191 |
| H | -2.5322864913 | 0.7328502846  | -4.9707206761 |
| H | -3.6701985541 | -3.0019675913 | -3.2860985466 |
| H | -3.4653446977 | -1.5255505889 | -5.2501962263 |
| C | -0.3595196891 | 2.1367641775  | 1.782700238   |
| C | -1.6303031269 | 2.7477761535  | 1.9320487318  |
| C | 0.5160692416  | 2.1065039671  | 2.886909985   |
| C | -2.026283395  | 3.2106541854  | 3.1788357588  |
| C | 0.0638730845  | 2.578518921   | 4.1188581502  |
| C | -1.1974430873 | 3.1100923499  | 4.2799361191  |
| H | -3.0019675913 | 3.6701985541  | 3.2860985466  |
| H | 0.7328502846  | 2.5322864913  | 4.9707206761  |
| H | -1.5255505889 | 3.4653446977  | 5.2501962263  |
| C | 3.0201867451  | 2.5659318718  | -0.7698206784 |
| C | 2.5778416717  | 4.0011318513  | -1.0315546397 |
| C | 4.4960484588  | 2.492144655   | -0.3819264391 |
| H | 2.4572386572  | 2.226127755   | 0.1029436755  |
| H | 1.527379143   | 4.0344453673  | -1.3266623898 |
| H | 2.7001890246  | 4.6008634363  | -0.1259904694 |
| H | 3.1710015086  | 4.4743505128  | -1.8176490887 |
| H | 4.7793975322  | 1.4690024881  | -0.1234982984 |
| H | 5.1311666789  | 2.8181592146  | -1.2096967491 |
| H | 4.6995632349  | 3.1338089272  | 0.4789854981  |
| C | 1.6637327917  | -1.9612659228 | -2.8352900958 |
| C | 2.8486103398  | -2.8949204145 | -3.0752462834 |
| C | 0.5170537401  | -2.2589808607 | -3.7940804563 |

|   |               |               |               |
|---|---------------|---------------|---------------|
| H | 1.2859950588  | -2.1729756485 | -1.8370780741 |
| H | 3.6583009336  | -2.6984635828 | -2.3679645571 |
| H | 2.5383503622  | -3.9368826594 | -2.960021054  |
| H | 3.253790222   | -2.7761358176 | -4.0836343028 |
| H | -0.3370645654 | -1.608368184  | -3.6030812412 |
| H | 0.8149550274  | -2.1255288812 | -4.8374636045 |
| H | 0.18509375    | -3.293602209  | -3.6743682316 |
| C | -1.6637327917 | 1.9612659228  | -2.8352900958 |
| C | -2.8486103398 | 2.8949204145  | -3.0752462834 |
| C | -0.5170537401 | 2.2589808607  | -3.7940804563 |

|   |               |               |               |
|---|---------------|---------------|---------------|
| C | -2.492144655  | 4.4960484588  | 0.3819264391  |
| C | -4.0011318513 | 2.5778416717  | 1.0315546397  |
| H | -2.226127755  | 2.4572386572  | -0.1029436755 |
| H | -1.4690024881 | 4.7793975322  | 0.1234982984  |
| H | -3.1338089272 | 4.6995632349  | -0.4789854981 |
| H | -2.8181592146 | 5.1311666789  | 1.2096967491  |
| H | -4.0344453673 | 1.527379143   | 1.3266623898  |
| H | -4.4743505128 | 3.1710015086  | 1.8176490887  |
| H | -4.6008634363 | 2.7001890246  | 0.1259904694  |
| C | -3.0201867451 | -2.5659318718 | -0.7698206784 |
| C | -2.5778416717 | -4.0011318513 | -1.0315546397 |
| C | -4.4960484588 | -2.492144655  | -0.3819264391 |
| H | -2.4572386572 | -2.226127755  | 0.1029436755  |
| H | -1.527379143  | -4.0344453673 | -1.3266623898 |
| H | -2.7001890246 | -4.6008634363 | -0.1259904694 |
| H | -3.1710015086 | -4.4743505128 | -1.8176490887 |
| H | -4.7793975322 | -1.4690024881 | -0.1234982984 |
| H | -5.1311666789 | -2.8181592146 | -1.2096967491 |
| H | -4.6995632349 | -3.1338089272 | 0.4789854981  |
| C | -1.9612659228 | -1.6637327917 | 2.8352900958  |
| C | -2.2589808607 | -0.5170537401 | 3.7940804563  |
| C | -2.8949204145 | -2.8486103398 | 3.0752462834  |
| H | -2.1729756485 | -1.2859950588 | 1.8370780741  |
| H | -1.608368184  | 0.3370645654  | 3.6030812412  |
| H | -3.293602209  | -0.18509375   | 3.6743682316  |
| H | -2.1255288812 | -0.8149550274 | 4.8374636045  |
| H | -2.6984635828 | -3.6583009336 | 2.3679645571  |
| H | -2.7761358176 | -3.253790222  | 4.0836343028  |
| H | -3.9368826594 | -2.5383503622 | 2.960021054   |
| C | 2.5659318718  | -3.0201867451 | 0.7698206784  |
| C | 2.492144655   | -4.4960484588 | 0.3819264391  |
| C | 4.0011318513  | -2.5778416717 | 1.0315546397  |
| H | 2.226127755   | -2.4572386572 | -0.1029436755 |
| H | 1.4690024881  | -4.7793975322 | 0.1234982984  |
| H | 3.1338089272  | -4.6995632349 | -0.4789854981 |

|   |              |               |              |
|---|--------------|---------------|--------------|
| H | 2.8181592146 | -5.1311666789 | 1.2096967491 |
| H | 4.0344453673 | -1.527379143  | 1.3266623898 |
| H | 4.4743505128 | -3.1710015086 | 1.8176490887 |
| H | 4.6008634363 | -2.7001890246 | 0.1259904694 |
| C | 1.9612659228 | 1.6637327917  | 2.8352900958 |
| C | 2.2589808607 | 0.5170537401  | 3.7940804563 |
| C | 2.8949204145 | 2.8486103398  | 3.0752462834 |
| H | 2.1729756485 | 1.2859950588  | 1.8370780741 |
| H | 1.608368184  | -0.3370645654 | 3.6030812412 |

## 7 References

- 
- [1] S. M. Godfrey, C. A. McAuliffe, I. Mushtaq, R. G. Pritchard, J. M. Sheffield, *J. Chem. Soc., Dalton Trans.* **1998**, 3815-3818.
- [2] R. Appel, H. Schöler, *Chern. Ber.* **1977**, 110, 2382.
- [3] G. R. Fulmer, A. J. M. Miller, N. H. Sherden, H. E. Gottlieb, A. Nudelman, B. M. Stoltz, J. E. Bercaw, K. I. Goldberg, *Organometallics* **2010**, 29, 2176.
- [4] M. W. Wallasch, D. Weismann, C. Riehn, S. Ambrus, G. Wolmershäuser, A. Lagutschenkov, G. Niedner-Schatteburg, H. Sitzmann, *Organometallics* **2010**, 29, 806-813.
- [5] R. T. Boéré, J. D. Masuda, *Can. J. Chem.* **2002**, 80, 1607-1617.
- [6] O. T. Beachley, D. J. MacRae, A. Y. Kovalevsky, *Organometallics* **2003**, 22, 1690-1695.
- [7] G. M. Sheldrick, *Acta Cryst. A* **2015**, 71, 3-8.
- [8] G. M. Sheldrick, *Acta Cryst. C* **2015**, 71, 3-8.
- [9] G. M. Sheldrick, *SADABS Version 2*, University of Göttingen, Germany, **2004**.
- [10] *Gaussian 09, Revision E.01*, M. J. Frisch, G. W. Trucks, H. B. Schlegel, G. E. Scuseria, M. A. Robb, J. R. Cheeseman, G. Scalmani, V. Barone, B. Mennucci, G. A. Petersson, H. Nakatsuji, M. Caricato, X. Li, H. P. Hratchian, A. F. Izmaylov, J. Bloino, G. Zheng, J. L. Sonnenberg, M. Hada, M. Ehara, K. Toyota, R. Fukuda, J. Hasegawa, M. Ishida, T. Nakajima, Y. Honda, O. Kitao, H. Nakai, T. Vreven, J. A. Montgomery Jr., J. E. Peralta, F. Ogliaro, M. Bearpark, J. J. Heyd, E. Brothers, K. N. Kudin, V. N. Staroverov, T. Keith, R. Kobayashi, J. Normand, K. Raghavachari, A. Rendell, J. C. Burant, S. S. Iyengar, J. Tomasi, M. Cossi, N. Rega, J. M. Millam, M. Klene, J. E. Knox, J. B. Cross, V. Bakken, C. Adamo, J. Jaramillo, R. Gomperts, R. E. Stratmann, O. Yazyev, A. J. Austin, R. Cammi, C. Pomelli, J. W. Ochterski, R. L. Martin, K. Morokuma, V. G. Zakrzewski, G. A. Voth, P. Salvador, J. J.

- 
- Dannenberg, S. Dapprich, A. D. Daniels, O. Farkas, J. B. Foresman, J. V. Ortiz, J. Cioslowski, D. J. Fox, Gaussian, Inc., Wallingford CT, **2013**.
- [11] a) E. D. Glendening, J. K. Badenhoop, A. E. Reed, J. E. Carpenter, J. A. Bohmann, C. M. Morales, C. R. Landis, F. Weinhold, *NBO 6.0*, Theoretical Chemistry Institute, University of Wisconsin, Madison, **2013**; b) J. E. Carpenter, F. Weinhold, *J. Mol. Struct.: THEOCHEM* **1988**, 169, 41–62; c) F. Weinhold, J. E. Carpenter, *The Structure of Small Molecules and Ions*, Plenum Press, **1988**; d) F. Weinhold, C. R. Landis, *Valency and Bonding. A Natural Bond Orbital Donor-Acceptor Perspective*, Cambridge University Press, **2005**.
- [12] a) J. P. Perdew, K. Burke, M. Ernzerhof, *Phys. Rev. Lett.* **1996**, 77, 3865–3868; b) J. P. Perdew, K. Burke, M. Ernzerhof, *Phys. Rev. Lett.* **1997**, 78, 1396–1396; c) C. Adamo, V. Barone, *J. Chem. Phys.* **1999**, 110, 6158–6170.
- [13] a) S. Grimme, J. Antony, S. Ehrlich, H. Krieg, *J. Chem. Phys.* **2010**, 132, 154104; b) S. Grimme, S. Ehrlich, L. Goerigk, *J. Comput. Chem.* **2011**, 32, 1456–1465.
- [14] a) F. Weigend, R. Ahlrichs, *Phys. Chem. Chem. Phys.* **2005**, 7, 3297–305; b) F. Weigend, *Phys. Chem. Chem. Phys.* **2006**, 8, 1057
- [15] a) F. London, *J. Phys. Radium* **1937**, 8, 397–409; b) R. McWeeny, *Phys. Rev.* **1962**, 126, 1028–1034; c) R. Ditchfield, *Mol. Phys.* **1974**, 27, 789–807; d) K. Wolinski, J. F. Hinton, P. Pulay, *J. Am. Chem. Soc.* **1990**, 112, 8251–8260; e) J. R. Cheeseman, G. W. Trucks, T. A. Keith, M. J. Frisch, *J. Chem. Phys.* **1996**, 104, 5497–5509.
- [16] C. J. Jameson, A. De Dios, A. Keith Jameson, *Chem. Phys. Lett.* **1990**, 167, 575–582.
- [17] C. van Wüllen, *Phys. Chem. Chem. Phys.* **2000**, 2, 2137–2144.
